# Supplementary material for: Ab Initio Calculations on the Ground and Excited Electronic States of Thorium–Ammonia, Thorium–Aza-Crown, and Thorium–Crown Ether Complexes
Source: MDPI journal article supplement (doi:10.3390/molecules28124712), 2023-06-12
Supplement: s1 [file s1]

# Supplementary Materials

## Ab Initio Calculations on the Ground and Excited Electronic States of Thorium–Ammonia, Thorium–Aza-Crown, and Thorium–Crown Ether Complexes

*Zhongyuan Lu, Benjamin A. Jackson, and Evangelos Miliordos\**

Department of Chemistry and Biochemistry, Auburn University, Auburn, AL 36849-5312, USA

**Corresponding Author**

\* E-mail: [emiliord@auburn.edu](mailto:emiliord@auburn.edu)

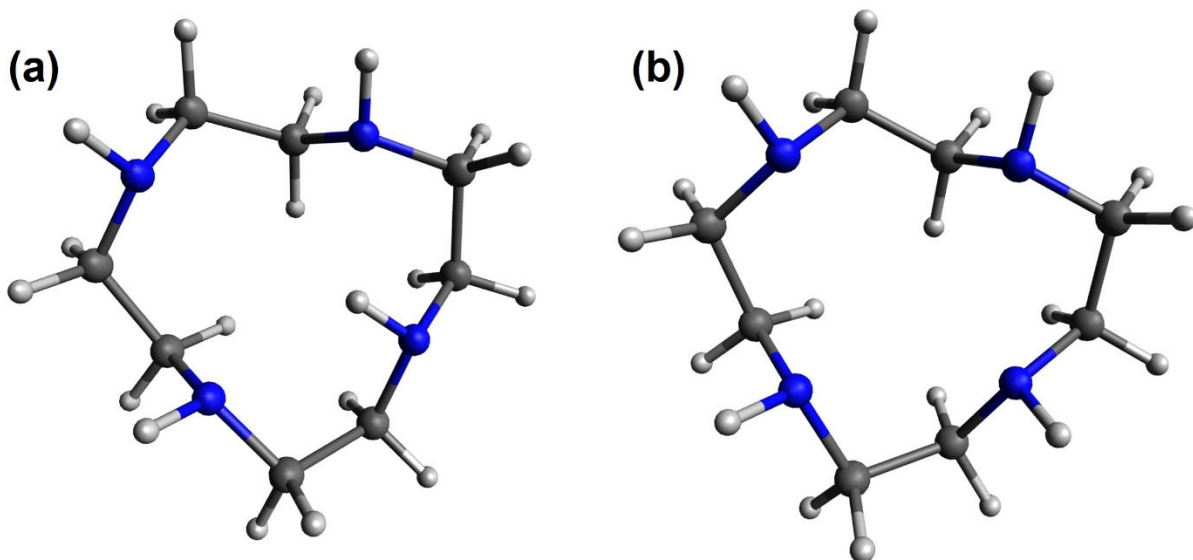

**Figure S1.** Structures of aza-crown ether 12C4N: (a) fully optimized, (b) fixed at the geometry in the  $\text{Th}(\text{12C4N})_2^{4+}$  complex.

**Table S1.** Energies (hartrees) for the  $\text{Th}(\text{NH}_3)_{n=0-10}^{4+,3+,0}$  species. The spin for the charged species is singlet (4+) and doublet (3+), while for the neutral species both the lowest singlet (S=0) and triplet (S=1) states are reported.

| $n$ | $\text{Th}(\text{NH}_3)_n^{4+} (\text{S}=0)$ | $\text{Th}(\text{NH}_3)_n^{3+} (\text{S}=1/2)$ | $\text{Th}(\text{NH}_3)_n^0 (\text{S}=0)$ | $\text{Th}(\text{NH}_3)_n^0 (\text{S}=1)$ |
|-----|----------------------------------------------|------------------------------------------------|-------------------------------------------|-------------------------------------------|
| 0   | -404.214983                                  | -405.278100                                    | -406.593310                               | -406.598549                               |
| 1   | -461.053438                                  | -461.978898                                    | -463.157366                               | -463.164141                               |
| 2   | -517.825621                                  | -518.654077                                    | -519.723392                               | -519.729842                               |
| 3   | -574.558086                                  | -575.312384                                    | -576.278371                               | -576.279880                               |
| 4   | -631.262347                                  | -631.956535                                    | -632.834821                               | -632.835097                               |
| 5   | -687.925485                                  | -688.574423                                    | -689.390959                               | -689.386922                               |
| 6   | -744.569805                                  | -745.180261                                    | -745.945630                               | -745.942632                               |
| 7   | -801.199465                                  | -801.773312                                    | -802.496153                               | -802.495036                               |
| 8   | -857.813602                                  | -858.362174                                    | -859.051770                               | -859.048942                               |
| 9   | -914.408325                                  | 914.921105                                     | -915.598359                               | -915.597735                               |
| 10  | -970.985977                                  | -971.475997                                    | -972.142435                               | -972.139865                               |

**Table S2.** Cartesian coordinates (Å) for the  $\text{Th}(\text{NH}_3)_{n=1-10}^{4+,3+,0}$  species. The spin for the charged species is singlet (4+) and doublet (3+), while for the neutral species both the lowest singlet (S=0) and triplet (S=1) states are reported.

| $n$ | $\text{Th}(\text{NH}_3)_n^{4+} (\text{S}=0)$                                                                                                                                                                                                                                                                                                                                                                                                                                                                        | $\text{Th}(\text{NH}_3)_n^{3+} (\text{S}=1/2)$                                                                                                                                                                                                                                                                                                                                                                                                                                                                    | $\text{Th}(\text{NH}_3)_n^0 (\text{S}=0)$                                                                                                                                                                                                                                                                                                                                                                                                                                                                          | $\text{Th}(\text{NH}_3)_n^0 (\text{S}=1)$                                                                                                                                                                                                                                                                                                                                                                                                                                                                           |
|-----|---------------------------------------------------------------------------------------------------------------------------------------------------------------------------------------------------------------------------------------------------------------------------------------------------------------------------------------------------------------------------------------------------------------------------------------------------------------------------------------------------------------------|-------------------------------------------------------------------------------------------------------------------------------------------------------------------------------------------------------------------------------------------------------------------------------------------------------------------------------------------------------------------------------------------------------------------------------------------------------------------------------------------------------------------|--------------------------------------------------------------------------------------------------------------------------------------------------------------------------------------------------------------------------------------------------------------------------------------------------------------------------------------------------------------------------------------------------------------------------------------------------------------------------------------------------------------------|---------------------------------------------------------------------------------------------------------------------------------------------------------------------------------------------------------------------------------------------------------------------------------------------------------------------------------------------------------------------------------------------------------------------------------------------------------------------------------------------------------------------|
| 1   | Th -0.246876 0.000000 0.000001<br>N 2.075202 -0.000000 0.000013<br>H 2.564039 -0.831207 -0.476032<br>H 2.564038 0.827812 -0.481914<br>H 2.564381 0.003396 0.957757                                                                                                                                                                                                                                                                                                                                                  | Th -0.263568 -0.000000 0.000001<br>N 2.234263 -0.000002 0.000008<br>H 2.693713 -0.807113 -0.477132<br>H 2.693681 0.816750 -0.460468<br>H 2.693886 -0.009613 0.937493                                                                                                                                                                                                                                                                                                                                              | Th -0.270210 -0.000102 -0.000002<br>N 2.316789 -0.001188 -0.000020<br>H 2.711028 -0.484307 0.815544<br>H 2.711161 -0.456442 -0.831385<br>H 2.679200 0.958214 0.016170                                                                                                                                                                                                                                                                                                                                              | Th -0.269575 0.000000 -0.000002<br>N 2.311247 0.000001 -0.000032<br>H 2.694129 0.799161 0.517534<br>H 2.694136 -0.847677 0.433519<br>H 2.694720 0.048502 -0.950670                                                                                                                                                                                                                                                                                                                                                  |
| 2   | Th -0.000258 -0.258676 -0.000001<br>N 1.976349 1.085714 -0.000003<br>H 2.119755 1.740301 0.820415<br>H 2.891363 0.550187 -0.000765<br>H 2.119109 1.741447 -0.819603<br>N -1.973644 1.088013 0.000001<br>H -2.634481 0.943557 0.816886<br>H -2.630859 0.949442 -0.820825<br>H -1.860609 2.139776 0.003971                                                                                                                                                                                                            | Th -0.000220 -0.290728 0.000000<br>N 2.033464 1.229136 -0.000001<br>H 2.142533 1.862525 0.817007<br>H 2.944615 0.727013 -0.013389<br>H 2.129078 1.881437 -0.803668<br>N -2.031416 1.230687 -0.000001<br>H -2.683498 1.096373 0.799392<br>H -2.664257 1.123763 -0.818739<br>H -1.862996 2.255631 0.019392                                                                                                                                                                                                          | Th 0.000011 0.016628 -0.000934<br>N 2.626899 -0.067883 0.005247<br>H 3.054150 0.510270 0.736241<br>H 2.950778 -1.030919 0.151641<br>H 3.019055 0.245221 -0.888737<br>N -2.626935 -0.069011 0.001981<br>H -2.978038 -0.271478 0.944374<br>H -2.986305 -0.803364 -0.618322<br>H -3.060345 0.812034 -0.291771                                                                                                                                                                                                         | Th 0.000000 0.000001 -0.000026<br>N -2.633334 0.000015 0.000115<br>H -3.016983 0.858923 -0.407924<br>H -3.016581 -0.782972 -0.539763<br>H -3.016810 -0.076204 0.948027<br>N 2.633331 -0.000029 0.000116<br>H 3.016829 0.076179 -0.947792<br>H 3.017000 -0.858911 0.408185<br>H 3.016549 0.782975 0.539987                                                                                                                                                                                                           |
| 3   | Th 0.000388 -0.000652 -0.216373<br>N -1.754317 -1.488519 0.605929<br>H -2.479080 -1.073075 1.241774<br>H -2.354221 -1.924724 -0.140335<br>H -1.450637 -2.332881 1.150997<br>N -0.417611 2.262281 0.604266<br>H -1.253762 2.402139 1.223457<br>H -0.586744 2.983146 -0.143368<br>H 0.343379 2.717617 1.166088<br>N 2.168841 -0.768349 0.606863<br>H 2.183454 -1.661271 1.158879<br>H 2.882140 -0.970982 -0.139608<br>H 2.702195 -0.119154 1.236314                                                                   | Th -0.000046 -0.000055 -0.145074<br>N 0.740449 2.348277 0.404796<br>H 1.213064 2.863917 -0.362487<br>H -0.010866 3.003473 0.691583<br>H 1.416784 2.422870 1.187928<br>N 1.663802 -1.814968 0.404870<br>H 2.609948 -1.491869 0.681389<br>H 1.866331 -2.488740 -0.358637<br>H 1.395038 -2.430994 1.195200<br>N -2.403864 -0.532897 0.405035<br>H -3.090464 -0.358132 -0.353891<br>H -2.600224 -1.516833 0.668484<br>H -2.798151 -0.001597 1.204175                                                                  | Th 0.143217 -0.021051 -0.006042<br>N -1.944694 1.657573 0.009342<br>H -1.739230 2.398313 -0.665153<br>H -2.898946 1.338882 -0.187803<br>H -1.959938 2.098650 0.935136<br>N 2.759969 0.051462 0.029188<br>H 3.145357 0.656643 -0.702492<br>H 3.060989 -0.908646 -0.186575<br>H 3.194113 0.328509 0.913512<br>N -2.060324 -1.514364 0.014991<br>H -2.999702 -1.139093 0.181763<br>H -2.087020 -2.033416 -0.870189<br>H -1.889836 -2.207918 0.750944                                                                  | Th 0.000260 -0.000010 -0.050023<br>N 2.612630 -0.022591 0.146594<br>H 3.008663 -0.847686 -0.320382<br>H 3.022858 0.795452 -0.320532<br>H 2.944048 -0.025369 1.116501<br>N -1.327005 -2.250171 0.146403<br>H -0.823355 -3.015565 -0.318571<br>H -2.238602 -2.180600 -0.322487<br>H -1.497268 -2.534212 1.116415<br>N -1.287795 2.272847 0.146395<br>H -0.771525 3.029122 -0.319662<br>H -2.200999 2.218737 -0.321399<br>H -1.452010 2.560427 1.116408                                                                |
| 4   | Th -0.000884 -0.000257 0.000055<br>N -0.031027 2.420062 -0.575221<br>H 0.270033 3.078913 0.177882<br>H 0.575971 2.715498 -1.372840<br>H -0.956216 2.819741 -0.851388<br>N 1.350047 -0.342651 2.061110<br>H 1.995345 0.434919 2.327395<br>H 1.994902 -1.164930 2.061318<br>H 0.815806 -0.489980 2.947015<br>N 1.016161 -1.283838 -1.872064<br>H 1.075105 -0.792695 -2.792568<br>H 2.002563 -1.600808 -1.735871<br>H 0.539674 -2.175597 -2.136010<br>N -2.327832 -0.791375 0.385741<br>H -2.473176 -1.423417 1.205172 | Th 0.000057 -0.000014 -0.000001<br>N 1.689186 1.497461 -1.217624<br>H 1.269577 2.203276 -1.847069<br>H 2.322605 2.059714 -0.622800<br>H 2.340315 0.996193 -1.846282<br>N -1.497109 1.688906 1.218290<br>H -0.995692 2.339757 1.847115<br>H -2.202944 1.269211 1.847657<br>H -2.059297 2.322604 0.623702<br>N 1.496968 -1.689720 1.217518<br>H 2.058729 -2.323518 0.622635<br>H 2.203167 -1.270375 1.846709<br>H 0.995516 -2.340484 1.846402<br>N -1.689525 -1.496541 -1.218165<br>H -2.322966 -2.058998 -0.623559 | Th 0.000017 -0.000050 0.000480<br>N 2.149776 -1.050478 -1.007585<br>H 2.739476 -0.352608 -1.490334<br>H 2.738891 -1.503048 -0.289186<br>H 1.928965 -1.772736 -1.699391<br>N 2.151692 1.049673 1.005631<br>H 2.743936 0.351434 1.484716<br>H 1.931170 1.769299 1.700282<br>H 2.738028 1.505661 0.287173<br>N -2.151957 -1.008407 1.046456<br>H -2.737731 -1.493942 0.347144<br>H -1.931522 -1.698561 1.770427<br>H -2.744774 -0.291218 1.495936<br>N -2.149644 1.009645 -1.048578<br>H -2.739039 1.491060 -0.349431 | Th -0.000000 -0.000021 -0.000031<br>N 2.188170 -1.584823 -0.000107<br>H 3.114565 -1.137537 0.000243<br>H 2.163503 -2.198493 0.819451<br>H 2.163977 -2.198210 -0.819887<br>N 2.188058 1.584953 0.000408<br>H 3.114473 1.137710 0.000199<br>H 2.163678 2.198278 0.820231<br>H 2.163515 2.198682 -0.819108<br>N -2.188100 -1.584889 -0.000340<br>H -2.163993 -2.198074 -0.820273<br>H -2.163579 -2.198751 0.819074<br>H -3.114391 -1.137399 0.000092<br>N -2.188129 1.584897 0.000282<br>H -2.163712 2.197987 0.820283 |

|   |                                                                                                                                                                                                                                                                                                                                                                                                                                                                                                                                                                                                                                                                                                                                                                                                                                                                         |                                                                                                                                                                                                                                                                                                                                                                                                                                                                                                                                                                                                                                                                                                                                                                                                                                                                    |                                                                                                                                                                                                                                                                                                                                                                                                                                                                                                                                                                                                                                                                                                                                                                                                                                                                     |                                                                                                                                                                                                                                                                                                                                                                                                                                                                                                                                                                                                                                                                                                                                                                                                                                                                       |
|---|-------------------------------------------------------------------------------------------------------------------------------------------------------------------------------------------------------------------------------------------------------------------------------------------------------------------------------------------------------------------------------------------------------------------------------------------------------------------------------------------------------------------------------------------------------------------------------------------------------------------------------------------------------------------------------------------------------------------------------------------------------------------------------------------------------------------------------------------------------------------------|--------------------------------------------------------------------------------------------------------------------------------------------------------------------------------------------------------------------------------------------------------------------------------------------------------------------------------------------------------------------------------------------------------------------------------------------------------------------------------------------------------------------------------------------------------------------------------------------------------------------------------------------------------------------------------------------------------------------------------------------------------------------------------------------------------------------------------------------------------------------|---------------------------------------------------------------------------------------------------------------------------------------------------------------------------------------------------------------------------------------------------------------------------------------------------------------------------------------------------------------------------------------------------------------------------------------------------------------------------------------------------------------------------------------------------------------------------------------------------------------------------------------------------------------------------------------------------------------------------------------------------------------------------------------------------------------------------------------------------------------------|-----------------------------------------------------------------------------------------------------------------------------------------------------------------------------------------------------------------------------------------------------------------------------------------------------------------------------------------------------------------------------------------------------------------------------------------------------------------------------------------------------------------------------------------------------------------------------------------------------------------------------------------------------------------------------------------------------------------------------------------------------------------------------------------------------------------------------------------------------------------------|
|   | H -3.046973 -0.052596 0.555787<br>H -2.764921 -1.341320 -0.387830                                                                                                                                                                                                                                                                                                                                                                                                                                                                                                                                                                                                                                                                                                                                                                                                       | H -2.340645 -0.994810 -1.846460<br>H -1.270122 -2.202090 -1.848047                                                                                                                                                                                                                                                                                                                                                                                                                                                                                                                                                                                                                                                                                                                                                                                                 | H -1.928653 1.703194 -1.769120<br>H -2.739333 0.292897 -1.502874                                                                                                                                                                                                                                                                                                                                                                                                                                                                                                                                                                                                                                                                                                                                                                                                    | H -2.163369 2.198859 -0.819052<br>H -3.114644 1.137853 -0.000165                                                                                                                                                                                                                                                                                                                                                                                                                                                                                                                                                                                                                                                                                                                                                                                                      |
| 5 | Th -0.000026 0.001009 0.088091<br>N 2.368037 -0.039535 -0.838832<br>H 2.472083 -0.057923 -1.872911<br>H 2.973044 0.763583 -0.573993<br>H 2.953925 -0.847418 -0.546514<br>N -0.041099 -2.359945 -0.856474<br>H 0.752017 -2.972623 -0.579234<br>H -0.038654 -2.456235 -1.891461<br>H -0.859245 -2.941954 -0.586003<br>N 0.040291 2.375348 -0.822248<br>H -0.752406 2.984052 -0.535141<br>H 0.858372 2.953493 -0.543333<br>H 0.037193 2.486989 -1.855718<br>N -2.369891 0.041786 -0.834160<br>H -2.985261 -0.740645 -0.533261<br>H -2.943554 0.869590 -0.575678<br>H -2.476793 0.017940 -1.867836<br>N 0.002862 -0.025826 2.611311<br>H -0.786787 0.467185 3.078251<br>H -0.032800 -0.964152 3.061864<br>H 0.829832 0.404492 3.075635                                                                                                                                      | Th -0.002553 -0.019804 0.004700<br>N 1.216075 -1.842972 -1.383392<br>H 1.877044 -1.456405 -2.076109<br>H 1.780096 -2.544991 -0.878001<br>H 0.591917 -2.419741 -1.969730<br>N -2.406450 0.561884 -0.871981<br>H -2.948728 -0.246077 -1.215126<br>H -2.403319 1.189077 -1.691043<br>H -3.060552 1.020627 -0.218569<br>N 2.492126 0.485075 0.654130<br>H 2.593884 1.094560 1.479728<br>H 3.051954 -0.339662 0.919005<br>H 3.079139 0.946196 -0.058623<br>N 0.068662 2.587139 0.040102<br>H -0.841607 3.069790 0.009374<br>H 0.512201 2.995318 0.877286<br>H 0.585518 3.018408 -0.742734<br>N -1.351975 -1.630036 1.522910<br>H -1.982163 -1.143768 2.180924<br>H -1.966388 -2.327560 1.073065<br>H -0.768290 -2.201054 2.155128                                                                                                                                       | Th 0.126675 -0.064040 0.000075<br>N 2.121160 1.607237 -0.000600<br>H 2.716661 1.455387 0.832901<br>H 2.716225 1.455502 -0.834429<br>H 1.882997 2.602647 -0.000450<br>N -1.929135 -0.808488 1.475291<br>H -1.778724 -0.529928 2.451630<br>H -2.038967 -1.829813 1.496029<br>H -2.864891 -0.439359 1.210558<br>N 2.441197 -1.293390 0.000470<br>H 3.013345 -1.075562 -0.830715<br>H 3.013004 -1.074085 0.831539<br>H 2.314142 -2.309532 0.001383<br>N -1.928158 -0.806178 -1.477570<br>H -1.776700 -0.527099 -2.453596<br>H -2.038309 -1.827465 -1.499058<br>H -2.864100 -0.436949 -1.213602<br>N -1.774634 1.854982 0.001707<br>H -1.731255 2.472972 -0.815496<br>H -2.743359 1.479012 -0.000739<br>H -1.733799 2.468773 0.822216                                                                                                                                    | Th -0.003024 0.008773 -0.017559<br>N -2.548425 -0.184727 0.863817<br>H -2.484227 -0.064508 1.881420<br>H -3.199016 0.524529 0.512398<br>H -3.010132 -1.084715 0.708822<br>N 2.159824 -1.500566 0.564431<br>H 1.985582 -2.509216 0.530566<br>H 2.434966 -1.300190 1.534159<br>H 2.981152 -1.334224 -0.029531<br>N -1.026916 2.479062 -0.405228<br>H -0.995354 2.688385 -1.409414<br>H -1.995628 2.637694 -0.112314<br>H -0.472134 3.195964 0.077037<br>N 2.179011 1.588976 -0.026326<br>H 2.804986 1.190851 -0.740507<br>H 2.035841 2.565854 -0.302277<br>H 2.695689 1.616089 0.861461<br>N -0.755175 -2.459152 -0.838276<br>H -0.712033 -2.387114 -1.860792<br>H -0.147303 -3.238623 -0.567832<br>H -1.708464 -2.755465 -0.611831                                                                                                                                     |
| 6 | Th -0.000013 -0.000029 -0.000347<br>N 1.588979 -1.989948 -0.467301<br>N -1.574319 -1.742458 -1.089737<br>N 1.579645 1.410102 -1.489570<br>N 1.577220 0.592775 1.964733<br>N -1.585319 -0.077321 2.044736<br>N -1.586100 1.807102 -0.960019<br>H 1.686545 -2.283164 -1.456864<br>H -2.575032 1.751388 -0.655239<br>H 1.349661 -2.883252 0.002121<br>H 2.576978 -1.858521 -0.183434<br>H -1.680424 1.840869 -1.991862<br>H -1.347651 2.790035 -0.730673<br>H -1.328397 -2.038829 -2.052702<br>H -1.343303 -0.764928 2.782473<br>H -2.563125 -1.453262 -1.202192<br>H -1.670101 -2.651081 -0.599872<br>H -2.573047 -0.318859 1.844614<br>H -1.684104 0.799809 2.588442<br>H 1.338114 1.452025 -2.497305<br>H 1.332185 1.444001 2.504177<br>H 2.568846 1.102645 -1.520538<br>H 2.565653 0.777177 1.713757<br>H 1.673522 2.413420 -1.246108<br>H 1.674086 -0.118677 2.712521 | Th 0.018040 0.001947 -0.000218<br>N 0.147328 -2.387804 1.132320<br>N -2.162865 0.898228 1.209868<br>N -1.923185 -1.335530 -1.209722<br>N 2.207131 -1.034388 -1.065734<br>N 1.937046 1.477237 1.067187<br>N -0.360437 2.365568 -1.132103<br>H -0.650021 -2.603299 1.747615<br>H -0.467734 3.193705 -0.529078<br>H 0.950358 -2.489082 1.769648<br>H 0.213825 -3.220324 0.529437<br>H -1.187280 2.409168 -1.744727<br>H 0.401540 2.632550 -1.771978<br>H -2.949929 1.234603 0.637078<br>H 2.559834 0.946952 1.693379<br>H -1.977447 1.685759 1.847502<br>H -2.601882 0.208078 1.835895<br>H 1.591993 2.226919 1.683518<br>H 2.590405 1.967242 0.439286<br>H -2.620440 -1.831834 -0.636821<br>H 2.704053 -0.384640 -1.691933<br>H -1.575085 -2.065238 -1.848112<br>H 2.029197 -1.840500 -1.681766<br>H -2.499072 -0.753963 -1.835056<br>H 2.948941 -1.374476 -0.436943 | Th 0.000001 -0.000004 -0.009662<br>N -1.985326 0.825842 1.559190<br>N 1.985328 -0.826665 1.558777<br>N 2.022404 1.773215 -0.121628<br>N -2.079570 0.933777 -1.393579<br>N -2.022438 -1.773139 -0.122520<br>N 2.079597 -0.933013 -1.394038<br>H -1.822494 0.564327 2.537896<br>H 2.117853 -1.959130 -1.406790<br>H -2.938041 0.474358 1.329830<br>H -2.073257 1.849935 1.562000<br>H 3.021382 -0.628275 -1.075908<br>H 2.012690 -0.652487 -2.379555<br>H 2.937997 -0.474913 1.329651<br>H -2.198511 -2.101152 -1.078522<br>H 2.073396 -1.850746 1.560962<br>H 1.822434 -0.565765 2.537635<br>H -2.937717 -1.417062 0.211547<br>H -1.839151 -2.614884 0.430940<br>H 2.937681 1.417107 0.212414<br>H -3.021363 0.628807 -1.075698<br>H 1.838937 2.614708 0.432158<br>H -2.012598 0.653888 -2.379271<br>H 2.198572 2.101653 -1.077468<br>H -2.117866 1.959900 -1.405671 | Th -0.000006 0.073224 -0.000679<br>N -1.990991 -0.323115 -1.779169<br>N 1.857540 -1.591112 -1.046226<br>N -1.857638 -1.578300 1.064708<br>N -2.137851 1.572532 0.721480<br>N 2.139132 1.563210 -0.738375<br>N 1.989845 -0.302435 1.783659<br>H -1.772101 -1.082053 -2.431828<br>H 2.960513 -0.453295 1.480483<br>H -1.951655 0.540745 -2.330933<br>H -2.962391 -0.463994 -1.473572<br>H 1.767387 -1.048783 2.449444<br>H 1.954663 0.570943 2.320547<br>H 1.996229 -2.434395 -0.479730<br>H 1.597442 2.164306 -1.371089<br>H 2.796604 -1.215763 -1.247894<br>H 1.490439 -1.918333 -1.946570<br>H 2.901049 1.173349 -1.303661<br>H 2.563437 2.171665 -0.034704<br>H -1.995675 -2.428531 0.508513<br>H -1.594575 2.182466 1.344317<br>H -2.796992 -1.200552 1.260595<br>H -2.897770 1.189984 1.294374<br>H -1.491621 -1.894462 1.969439<br>H -2.564668 2.171058 0.010829 |
| 7 | Th -0.022171 0.000240 -0.000021<br>N -0.696122 -2.031413 -1.515128<br>N 1.649140 -1.883548 0.778437<br>N -0.656439 -0.317397 2.524758<br>N -0.704406 2.339776 -0.968981                                                                                                                                                                                                                                                                                                                                                                                                                                                                                                                                                                                                                                                                                                 | Th 0.006280 0.059886 -0.023644<br>N 2.154809 -0.299844 -1.599381<br>N 1.823202 -1.066488 1.593875<br>N -0.171684 -2.611878 -0.404934<br>N -1.460263 2.285601 0.306976                                                                                                                                                                                                                                                                                                                                                                                                                                                                                                                                                                                                                                                                                              | Th 0.002895 0.087356 -0.059320<br>N 2.214017 -0.415994 -1.486839<br>N 1.862873 -1.043363 1.510779<br>N -0.216816 -2.583054 -0.325284<br>N -1.461799 2.301784 0.323442                                                                                                                                                                                                                                                                                                                                                                                                                                                                                                                                                                                                                                                                                               | Th -0.036544 0.011472 -0.006761<br>N -2.078715 -0.105188 1.749799<br>N -2.115291 -1.395324 -0.930772<br>N 0.947149 -2.521953 -0.077124<br>N 1.192289 2.433781 -0.014345                                                                                                                                                                                                                                                                                                                                                                                                                                                                                                                                                                                                                                                                                               |

|   |    |           |           |           |    |           |           |           |    |           |           |           |    |           |           |           |
|---|----|-----------|-----------|-----------|----|-----------|-----------|-----------|----|-----------|-----------|-----------|----|-----------|-----------|-----------|
|   | N  | 1.593280  | 0.260856  | -2.066210 | N  | 1.626169  | 2.177575  | 0.310968  | N  | 1.802522  | 2.009864  | 0.341291  | N  | -1.960619 | 1.667912  | -0.811376 |
|   | N  | 1.645015  | 1.638020  | 1.218606  | N  | -1.890816 | -0.875725 | 1.626712  | N  | -1.912665 | -0.881968 | 1.565365  | N  | 2.212601  | -0.116139 | -1.468177 |
|   | H  | 0.078118  | -2.570565 | -1.935561 | H  | 3.087862  | -0.384918 | -1.175470 | H  | 3.127898  | -0.301632 | -1.025543 | H  | -2.911622 | 0.470299  | 1.527570  |
|   | H  | 2.285729  | 2.177337  | 0.613251  | H  | -2.356110 | -0.116739 | 2.141163  | H  | -2.495072 | -0.166906 | 2.019838  | H  | 2.537377  | 0.780009  | -1.850857 |
|   | H  | -1.276490 | -1.805944 | -2.341244 | H  | 2.262805  | 0.474767  | -2.267351 | H  | 2.169557  | 0.292017  | -2.232090 | H  | -1.741458 | 0.246125  | 2.651869  |
|   | H  | -1.251701 | -2.773013 | -1.055231 | H  | 2.100397  | -1.115498 | -2.221877 | H  | 2.259702  | -1.324526 | -1.964845 | H  | -2.450072 | -1.045386 | 1.933417  |
|   | H  | 2.301007  | 1.211598  | 1.893590  | H  | -1.538265 | -1.471151 | 2.386729  | H  | -1.492935 | -1.408881 | 2.346217  | H  | 2.029280  | -0.698822 | -2.292650 |
|   | H  | 1.203715  | 2.382170  | 1.785291  | H  | -2.672096 | -1.421728 | 1.240767  | H  | -2.584149 | -1.543251 | 1.135200  | H  | 3.050123  | -0.519551 | -1.004858 |
|   | H  | 2.299386  | -1.637189 | 1.542778  | H  | 1.433283  | -1.541172 | 2.417909  | H  | 1.499379  | -1.348053 | 2.423052  | H  | -2.074204 | -1.397846 | -1.957150 |
|   | H  | 1.128868  | 0.371329  | -2.983714 | H  | 1.577678  | 2.895206  | -0.425583 | H  | 1.909369  | 2.497143  | -0.558494 | H  | -1.837827 | 2.646382  | -0.527260 |
|   | H  | 2.295865  | -2.251102 | 0.061153  | H  | 2.443861  | -0.365806 | 2.019662  | H  | 2.627693  | -0.379371 | 1.729721  | H  | -3.045007 | -1.011010 | -0.684372 |
|   | H  | 1.209391  | -2.747901 | 1.137816  | H  | 2.473751  | -1.759573 | 1.201562  | H  | 2.349284  | -1.861884 | 1.122838  | H  | -2.148519 | -2.380564 | -0.641462 |
|   | H  | 2.243161  | -0.522431 | -2.244972 | H  | 2.630726  | 1.967554  | 0.360525  | H  | 2.746012  | 1.661012  | 0.590172  | H  | -2.920121 | 1.420783  | -0.504023 |
|   | H  | 2.236375  | 1.069542  | -2.049900 | H  | 1.454220  | 2.708026  | 1.174456  | H  | 1.591272  | 2.735742  | 1.035574  | H  | -1.987402 | 1.666593  | -1.839496 |
|   | H  | -1.219424 | -1.156374 | 2.746842  | H  | 0.469063  | -2.992404 | -1.113003 | H  | 0.430242  | -3.015413 | -0.998234 | H  | 0.510744  | -3.170650 | 0.582622  |
|   | H  | 0.067680  | 2.970630  | -1.238810 | H  | -1.248552 | 2.806311  | 1.167599  | H  | -1.049838 | 2.958543  | 0.990686  | H  | 1.172866  | 2.878688  | -0.939857 |
|   | H  | -1.219543 | 0.440346  | 2.947727  | H  | -1.091486 | -2.934168 | -0.730695 | H  | -1.160895 | -2.868431 | -0.633401 | H  | 1.954016  | -2.551537 | 0.133294  |
|   | H  | -1.266775 | 2.941415  | -0.342953 | H  | -2.476802 | 2.145625  | 0.360373  | H  | -2.435930 | 2.173899  | 0.614250  | H  | 2.185963  | 2.382477  | 0.243671  |
|   | H  | 0.128325  | -0.401187 | 3.191123  | H  | 0.005466  | -3.206555 | 0.414825  | H  | -0.075594 | -3.103372 | 0.554374  | H  | 0.851146  | -2.942191 | -1.010296 |
|   | H  | -1.280066 | 2.322323  | -1.828312 | H  | -1.363662 | 2.995462  | -0.432334 | H  | -1.471934 | 2.779325  | -0.586090 | H  | 0.768895  | 3.094395  | 0.641877  |
|   | N  | -2.641823 | -0.008241 | 0.028775  | N  | -2.135555 | -0.128877 | -1.634242 | N  | -2.325002 | -0.121823 | -1.402930 | N  | 2.101344  | -0.063448 | 1.620482  |
|   | H  | -3.106716 | 0.107545  | -0.887477 | H  | -2.212655 | 0.685539  | -2.257614 | H  | -2.296530 | 0.509674  | -2.209503 | H  | 1.920702  | 0.514009  | 2.450987  |
|   | H  | -3.089661 | -0.866088 | 0.392824  | H  | -2.087615 | -0.908322 | -2.302118 | H  | -2.443924 | -1.065204 | -1.792100 | H  | 2.333039  | -0.997268 | 1.984404  |
|   | H  | -3.092411 | 0.729570  | 0.595873  | H  | -3.078079 | -0.212772 | -1.231338 | H  | -3.206066 | 0.059450  | -0.903564 | H  | 2.999730  | 0.285140  | 1.231658  |
| 8 | Th | 0.000099  | -0.000061 | 0.000261  | Th | 0.000081  | 0.000197  | -0.000600 | Th | 0.000086  | -0.007166 | -0.000266 | Th | -0.001418 | -0.001915 | 0.001915  |
|   | N  | 1.683751  | 1.443269  | 1.476705  | N  | 2.103132  | 1.063317  | 1.359260  | N  | 2.262682  | 0.867201  | 1.136073  | N  | -0.252036 | -2.355750 | -1.232081 |
|   | N  | -1.443166 | 1.683161  | 1.477440  | N  | -1.066145 | 2.102296  | 1.358160  | N  | -0.724516 | 2.201809  | 1.342644  | N  | -2.355934 | 0.264797  | -1.226419 |
|   | N  | -1.683096 | -1.444182 | 1.476661  | N  | -2.102646 | -1.064088 | 1.359826  | N  | -2.155591 | -0.870729 | 1.317104  | N  | 0.254247  | 2.347701  | -1.238883 |
|   | N  | 0.163437  | 2.211169  | -1.477390 | N  | 0.567987  | 2.288552  | -1.356335 | N  | 0.718985  | 2.205289  | -1.340398 | N  | -1.980136 | -1.313979 | 1.224737  |
|   | N  | -0.164013 | -2.209653 | -1.480022 | N  | -0.564727 | -2.287303 | -1.360028 | N  | -0.994174 | -2.180406 | -1.228612 | N  | 1.974287  | 1.303811  | 1.237190  |
|   | N  | 2.211875  | -0.163497 | -1.476731 | N  | 2.287930  | -0.569223 | -1.359321 | N  | 2.158233  | -0.865258 | -1.317242 | N  | 1.326149  | -1.967740 | 1.227476  |
|   | N  | 1.442754  | -1.684226 | 1.476972  | N  | 1.061366  | -2.100317 | 1.364143  | N  | 0.998186  | -2.178812 | 1.228476  | N  | 2.347193  | -0.239712 | -1.244823 |
|   | N  | -2.212317 | 0.164542  | -1.475903 | N  | -2.287578 | 0.564977  | -1.360890 | N  | -2.264493 | 0.863373  | -1.135977 | N  | -1.300908 | 1.976857  | 1.236615  |
|   | H  | 1.640947  | 2.465668  | 1.349181  | H  | 2.638226  | 1.826245  | 0.927052  | H  | 2.829284  | 1.512736  | 0.565578  | H  | -0.711454 | -3.090758 | -0.662621 |
|   | H  | 1.574625  | 1.348112  | 2.498613  | H  | 1.843331  | 1.438119  | 2.278828  | H  | 2.123751  | 1.357477  | 2.030004  | H  | -0.800247 | -2.320402 | -2.099505 |
|   | H  | 2.687613  | 1.246152  | 1.347301  | H  | 2.829458  | 0.375333  | 1.588824  | H  | 2.913908  | 0.089842  | 1.355613  | H  | 0.653594  | -2.769514 | -1.500266 |
|   | H  | -2.465226 | 1.643864  | 1.346269  | H  | -1.821077 | 2.644273  | 0.920503  | H  | -1.293837 | 2.869667  | 0.801205  | H  | -3.087003 | 0.729464  | -0.655433 |
|   | H  | -1.351999 | 1.570503  | 2.499342  | H  | -1.452340 | 1.840565  | 2.272428  | H  | -1.263359 | 2.030887  | 2.203560  | H  | -2.321031 | 0.809750  | -2.095805 |
|   | H  | -1.242601 | 2.686866  | 1.352137  | H  | -0.376249 | 2.823266  | 1.598653  | H  | 0.093152  | 2.757657  | 1.642766  | H  | -2.774106 | -0.639849 | -1.491204 |
|   | H  | -1.642698 | -2.466160 | 1.345057  | H  | -2.629933 | -1.835236 | 0.932688  | H  | -2.904022 | -1.244359 | 0.698016  | H  | 0.761083  | 3.070416  | -0.693516 |
|   | H  | -1.571295 | -1.353244 | 2.498647  | H  | -1.844214 | -1.428210 | 2.284059  | H  | -2.001765 | -1.609119 | 2.015551  | H  | 0.757346  | 2.298877  | -2.132531 |
|   | H  | -2.686868 | -1.244439 | 1.350629  | H  | -2.835423 | -0.379565 | 1.579182  | H  | -2.620273 | -0.111665 | 1.837333  | H  | -0.651811 | 2.786022  | -1.463211 |
|   | H  | 2.465494  | -1.637168 | 1.353899  | H  | 1.834931  | -2.627561 | 0.941371  | H  | 1.049906  | -3.044280 | 0.672420  | H  | 3.076840  | -0.728469 | -0.693271 |
|   | H  | 1.343054  | -1.579450 | 2.498908  | H  | 1.420959  | -1.839773 | 2.289565  | H  | 1.978687  | -2.006148 | 1.506453  | H  | 2.303147  | -0.755857 | -2.131205 |
|   | H  | 1.249815  | -2.688316 | 1.343001  | H  | 0.376704  | -2.833412 | 1.581850  | H  | 0.518585  | -2.435199 | 2.098276  | H  | 2.770904  | 0.669883  | -1.482233 |
|   | H  | 1.011474  | 2.783695  | -1.349220 | H  | 1.177935  | 2.987626  | -0.915377 | H  | 1.284348  | 2.874894  | -0.797031 | H  | -2.426824 | -2.051257 | 0.648034  |
|   | H  | 0.152568  | 2.066684  | -2.499276 | H  | 1.007567  | 2.122141  | -2.268822 | H  | 1.260434  | 2.037172  | -2.200189 | H  | -1.703031 | -1.794486 | 2.088780  |
|   | H  | -0.591281 | 2.902002  | -1.348905 | H  | -0.266594 | 2.834085  | -1.600310 | H  | -0.100285 | 2.757986  | -1.641821 | H  | -2.759879 | -0.696510 | 1.497072  |
|   | H  | -1.009789 | -2.784593 | -1.347801 | H  | -1.190676 | -2.978885 | -0.929876 | H  | -1.970747 | -2.004756 | -1.517899 | H  | 2.385429  | 2.083174  | 0.689797  |
|   | H  | -0.159075 | -2.064096 | -2.501792 | H  | -0.985052 | -2.117653 | -2.280953 | H  | -0.506676 | -2.444781 | -2.091617 | H  | 1.700992  | 1.730325  | 2.130168  |
|   | H  | 0.593300  | -2.898514 | -1.356388 | H  | 0.268480  | -2.842336 | -1.586630 | H  | -1.056339 | -3.042142 | -0.667710 | H  | 2.777602  | 0.698048  | 1.462658  |
|   | H  | 2.786789  | -1.009359 | -1.344944 | H  | 2.973207  | -1.204172 | -0.932296 | H  | 2.906183  | -1.239935 | -0.698154 | H  | 2.076082  | -2.403716 | 0.658230  |
|   | H  | 2.067496  | -0.157379 | -2.498655 | H  | 2.117494  | -0.980491 | -2.284176 | H  | 2.006467  | -1.601378 | -2.018496 | H  | 1.793535  | -1.683492 | 2.096355  |

|    |                                                                                                                                                                                                                                                                                                                                                                                                                                                                                                                                                                                                                                                                                                                                                                                                                                                                                                                                                                                                                                                                                                                                                                                                                                                                                      |                                                                                                                                                                                                                                                                                                                                                                                                                                                                                                                                                                                                                                                                                                                                                                                                                                                                                                                                                                                                                                                                                                                                                                                                                                                                                      |                                                                                                                                                                                                                                                                                                                                                                                                                                                                                                                                                                                                                                                                                                                                                                                                                                                                                                                                                                                                                                                                                                                                                                                                                                                                                       |                                                                                                                                                                                                                                                                                                                                                                                                                                                                                                                                                                                                                                                                                                                                                                                                                                                                                                                                                                                                                                                                                                                                                                                                                                                                                     |
|----|--------------------------------------------------------------------------------------------------------------------------------------------------------------------------------------------------------------------------------------------------------------------------------------------------------------------------------------------------------------------------------------------------------------------------------------------------------------------------------------------------------------------------------------------------------------------------------------------------------------------------------------------------------------------------------------------------------------------------------------------------------------------------------------------------------------------------------------------------------------------------------------------------------------------------------------------------------------------------------------------------------------------------------------------------------------------------------------------------------------------------------------------------------------------------------------------------------------------------------------------------------------------------------------|--------------------------------------------------------------------------------------------------------------------------------------------------------------------------------------------------------------------------------------------------------------------------------------------------------------------------------------------------------------------------------------------------------------------------------------------------------------------------------------------------------------------------------------------------------------------------------------------------------------------------------------------------------------------------------------------------------------------------------------------------------------------------------------------------------------------------------------------------------------------------------------------------------------------------------------------------------------------------------------------------------------------------------------------------------------------------------------------------------------------------------------------------------------------------------------------------------------------------------------------------------------------------------------|---------------------------------------------------------------------------------------------------------------------------------------------------------------------------------------------------------------------------------------------------------------------------------------------------------------------------------------------------------------------------------------------------------------------------------------------------------------------------------------------------------------------------------------------------------------------------------------------------------------------------------------------------------------------------------------------------------------------------------------------------------------------------------------------------------------------------------------------------------------------------------------------------------------------------------------------------------------------------------------------------------------------------------------------------------------------------------------------------------------------------------------------------------------------------------------------------------------------------------------------------------------------------------------|-------------------------------------------------------------------------------------------------------------------------------------------------------------------------------------------------------------------------------------------------------------------------------------------------------------------------------------------------------------------------------------------------------------------------------------------------------------------------------------------------------------------------------------------------------------------------------------------------------------------------------------------------------------------------------------------------------------------------------------------------------------------------------------------------------------------------------------------------------------------------------------------------------------------------------------------------------------------------------------------------------------------------------------------------------------------------------------------------------------------------------------------------------------------------------------------------------------------------------------------------------------------------------------|
|    | H 2.900565 0.593687 -1.351384<br>H -2.784155 1.012996 -1.347465<br>H -2.068622 0.153569 -2.497892<br>H -2.903648 -0.589638 -1.346901                                                                                                                                                                                                                                                                                                                                                                                                                                                                                                                                                                                                                                                                                                                                                                                                                                                                                                                                                                                                                                                                                                                                                 | H 2.850200 0.261450 -1.577239<br>H -2.973139 1.200445 -0.935108<br>H -2.116726 0.974752 -2.286347<br>H -2.849614 -0.266192 -1.577608                                                                                                                                                                                                                                                                                                                                                                                                                                                                                                                                                                                                                                                                                                                                                                                                                                                                                                                                                                                                                                                                                                                                                 | H 2.622818 -0.103857 -1.834143<br>H -2.829558 1.511539 -0.566925<br>H -2.127038 1.349917 -2.032156<br>H -2.916560 0.085489 -1.351186                                                                                                                                                                                                                                                                                                                                                                                                                                                                                                                                                                                                                                                                                                                                                                                                                                                                                                                                                                                                                                                                                                                                                  | H 0.716720 -2.755599 1.494273<br>H -2.062761 2.404218 0.677359<br>H -1.749796 1.701416 2.117894<br>H -0.687747 2.768786 1.481186                                                                                                                                                                                                                                                                                                                                                                                                                                                                                                                                                                                                                                                                                                                                                                                                                                                                                                                                                                                                                                                                                                                                                    |
| 9  | Th 0.000000 0.000020 0.000088<br>N -0.084406 -2.551244 0.906178<br>N 1.925334 -1.463030 -1.212184<br>N 1.972488 1.772780 -0.531337<br>N -1.904389 -1.381226 -1.334794<br>N -1.858736 1.852450 -0.654992<br>N -1.984415 -0.350570 1.804578<br>N -0.013639 2.059958 1.758723<br>N 0.096656 0.492198 -2.661124<br>H 0.704453 -3.159013 0.647417<br>H -0.107360 -2.645496 1.931075<br>H -0.894456 -3.115222 0.616019<br>H 2.437826 -0.999333 -1.974336<br>H 2.690349 -1.800935 -0.611784<br>H 1.600180 -2.329180 -1.666177<br>H 1.687213 2.598351 -1.078152<br>H 2.431610 2.201959 0.283243<br>H 2.774978 1.416791 -1.069125<br>H -0.831342 2.129987 2.379197<br>H 0.767309 2.100341 2.427295<br>H 0.016778 2.994937 1.328934<br>H -2.725437 -1.674469 -0.787194<br>H -2.338730 -0.902692 -2.135362<br>H -1.591183 -2.267548 -1.757084<br>H -1.505155 2.663757 -1.182943<br>H -2.640021 1.528968 -1.242242<br>H -2.349695 2.302797 0.129012<br>H -2.760219 0.325285 1.769589<br>H -2.480544 -1.251131 1.767133<br>H -1.694236 -0.304797 2.792341<br>H 0.099100 -0.347700 -3.256380<br>H -0.679817 1.039230 -3.056520<br>H 0.918698 1.006978 -3.004197<br>N 1.851227 -0.431546 1.924296<br>H 1.504393 -0.365294 2.892442<br>H 2.658281 0.207573 1.933464<br>H 2.306188 -1.354351 1.921052 | Th -0.006306 0.006816 -0.077266<br>N 2.161089 0.353799 -1.743603<br>N 2.083001 -1.620808 0.778805<br>N -1.558289 -1.994029 1.073753<br>N 1.723287 1.930667 0.929656<br>N -1.953920 1.486378 1.237080<br>N -0.444245 2.424839 -1.341592<br>N -2.399699 -0.230021 -1.439332<br>N 0.290440 -0.128031 2.817868<br>H 3.116555 0.262909 -1.378786<br>H 2.132675 -0.297331 -2.534573<br>H 2.172764 1.266413 -2.210033<br>H 1.790621 -2.523377 1.169506<br>H 2.741999 -1.889136 0.040145<br>H 2.692467 -1.237990 1.509361<br>H -2.076302 -1.736684 1.920756<br>H -2.290733 -2.349974 0.450310<br>H -1.057395 -2.843517 1.357108<br>H -2.438506 0.434736 -2.218181<br>H -2.517279 -1.131216 -1.913723<br>H -3.296027 -0.101975 -0.954677<br>H 2.064484 2.589085 0.221452<br>H 1.351541 2.542177 1.664926<br>H 2.588432 1.565598 1.342733<br>H -2.516121 0.986022 1.934164<br>H -1.612750 2.305262 1.753066<br>H -2.661310 1.884279 0.610108<br>H -1.429113 2.640489 -1.524759<br>H -0.089236 3.298020 -0.935647<br>H -0.038077 2.399088 -2.282279<br>H 1.185573 0.206307 3.189859<br>H -0.394242 0.402479 3.367020<br>H 0.217826 -1.073388 3.208392<br>N 0.155746 -2.280186 -1.616123<br>H -0.218646 -2.049350 -2.542229<br>H -0.350312 -3.130139 -1.343532<br>H 1.096790 -2.630532 -1.822117 | Th -0.013250 0.019830 -0.106458<br>N -2.538601 -0.039076 -1.079353<br>N -1.796535 1.142702 1.578772<br>N 1.517187 1.866574 1.156059<br>N -1.303974 -2.155494 0.855737<br>N 2.149801 -1.547527 0.264307<br>N 0.026038 -2.065814 -1.837401<br>N 2.124981 0.811350 -1.556665<br>N 0.591289 -0.630885 2.565376<br>H -3.198480 -0.700565 -0.645908<br>H -3.023353 0.873111 -0.994667<br>H -2.546224 -0.244677 -2.085810<br>H -1.426488 1.728134 2.339965<br>H -2.487528 1.749434 1.096262<br>H -2.386450 0.440871 2.053396<br>H 2.444306 1.455019 1.371682<br>H 1.749552 2.704281 0.604597<br>H 1.173218 2.225206 2.055996<br>H 2.310963 0.185132 -2.349479<br>H 2.029661 1.740805 -1.983095<br>H 3.012483 0.848151 -1.024123<br>H -1.953789 -2.614879 0.202690<br>H -0.647582 -2.906560 1.142478<br>H -1.874031 -1.977921 1.698008<br>H 2.887929 -1.059036 0.804753<br>H 1.953807 -2.416230 0.790903<br>H 2.635632 -1.860288 -0.587873<br>H 0.684621 -1.903301 -2.605092<br>H 0.267144 -2.981935 -1.438751<br>H -0.884577 -2.188219 -2.291864<br>H -0.073896 -0.304091 3.276289<br>H 0.636206 -1.651944 2.703761<br>H 1.511303 -0.290677 2.874407<br>N -0.664616 2.474457 -1.043086<br>H -1.623902 2.781613 -0.827211<br>H -0.649355 2.300054 -2.054911<br>H -0.067622 3.289804 -0.871398 | Th -0.012230 0.012286 -0.117556<br>N 0.154774 -2.192815 -1.676122<br>N -1.401513 -2.065867 0.931703<br>N -1.873373 1.387994 1.284910<br>N 2.044568 -1.576015 0.637383<br>N 1.538744 1.905782 1.054547<br>N 2.275584 0.508074 -1.487940<br>N -0.463412 2.440799 -1.260503<br>N 0.320788 -0.326823 2.682014<br>H 0.316997 -3.082492 -1.181777<br>H -0.695343 -2.335506 -2.232119<br>H 0.909295 -2.117236 -2.366903<br>H -2.070277 -1.777110 1.663261<br>H -1.976755 -2.583054 0.251918<br>H -0.810301 -2.788448 1.374830<br>H -1.537910 2.047753 2.003280<br>H -2.512440 1.950822 0.695901<br>H -2.519480 0.757722 1.794321<br>H 0.175786 2.613257 -2.041036<br>H -1.401918 2.468714 -1.674357<br>H -0.416241 3.268739 -0.657092<br>H 2.583544 -1.996744 -0.132880<br>H 2.755304 -1.045038 1.175826<br>H 1.786969 -2.374356 1.239561<br>H 1.140317 2.392202 1.869574<br>H 2.415644 1.475445 1.406603<br>H 1.874191 2.655172 0.433593<br>H 2.288124 1.398414 -2.001180<br>H 3.121419 0.535849 -0.893844<br>H 2.474114 -0.203742 -2.202288<br>H 0.296994 -1.316887 2.959135<br>H 1.229442 0.013110 3.021875<br>H -0.381575 0.127731 3.276519<br>N -2.496829 -0.172086 -1.185611<br>H -2.540188 -0.757134 -2.028988<br>H -2.874728 0.741833 -1.482478<br>H -3.225615 -0.538015 -0.553874 |
| 10 | Th 0.000165 -0.000397 -0.004258<br>N 1.217173 2.267658 -0.946978<br>N 1.071924 -1.133195 -2.254037<br>N -1.217160 -2.337474 -0.760423<br>N 1.225788 0.965975 2.242935<br>N -1.230431 -0.780125 2.311871<br>N -1.120087 2.316992 0.927890<br>N -2.786955 0.073464 -0.132498<br>N 1.119164 -2.232939 1.113304<br>H 1.900892 2.708007 -0.318022<br>H 1.761043 2.155007 -1.812203<br>H 0.593257 3.049949 -1.180934                                                                                                                                                                                                                                                                                                                                                                                                                                                                                                                                                                                                                                                                                                                                                                                                                                                                       | Th 0.000262 0.000026 -0.043516<br>N 1.810341 -1.852360 1.095451<br>N 1.046711 -1.207810 -2.384248<br>N -1.045162 1.235960 -2.368104<br>N -1.160511 -1.015697 2.344757<br>N -1.813833 1.844261 1.100538<br>N 1.148505 0.994590 2.359711<br>N 0.702313 2.756875 -0.308114<br>N -2.776061 -0.554754 -0.549947<br>H 1.420024 -2.568128 1.716027<br>H 2.300049 -2.405935 0.385324<br>H 2.573703 -1.446180 1.644970                                                                                                                                                                                                                                                                                                                                                                                                                                                                                                                                                                                                                                                                                                                                                                                                                                                                        | Th 0.000024 -0.000032 -0.009355<br>N -1.159529 -2.311986 -0.720063<br>N -1.001144 1.119569 -2.232892<br>N 1.161782 2.313247 -0.712778<br>N -1.246035 -0.849467 2.206085<br>N 1.245913 0.845098 2.208102<br>N 1.139262 -2.187666 1.015764<br>N 2.710010 -0.051956 -0.225528<br>N -1.139897 2.185128 1.020787<br>H -1.793271 -2.688910 0.015445<br>H -1.761352 -2.254934 -1.556082<br>H -0.505406 -3.084001 -0.921378                                                                                                                                                                                                                                                                                                                                                                                                                                                                                                                                                                                                                                                                                                                                                                                                                                                                   | Th 0.000370 0.001124 0.000152<br>N -1.385421 -1.813482 -1.394948<br>N -1.438780 1.583682 -1.599389<br>N 0.971532 2.471015 -0.270975<br>N -0.827142 -1.755091 1.853683<br>N 1.539899 0.001841 2.200751<br>N 1.194114 -2.388636 -0.147241<br>N 2.692707 0.187791 -0.381814<br>N -0.809527 1.741399 1.863683<br>H -1.884128 -2.493673 -0.786845<br>H -2.118287 -1.427182 -2.009801<br>H -0.815866 -2.407815 -2.015263                                                                                                                                                                                                                                                                                                                                                                                                                                                                                                                                                                                                                                                                                                                                                                                                                                                                  |

|   |           |           |           |   |           |           |           |   |           |           |           |   |           |           |           |
|---|-----------|-----------|-----------|---|-----------|-----------|-----------|---|-----------|-----------|-----------|---|-----------|-----------|-----------|
| H | 1.686688  | -1.942905 | -2.100071 | H | 0.442073  | -1.887232 | -2.855600 | H | -1.559604 | 1.964603  | -1.991358 | H | -1.919615 | 2.332349  | -1.053141 |
| H | 0.398517  | -1.493406 | -2.941776 | H | 1.221330  | -0.500115 | -3.104173 | H | -0.307698 | 1.455337  | -2.913491 | H | -0.902210 | 2.093941  | -2.315538 |
| H | 1.663742  | -0.518071 | -2.827331 | H | 1.945260  | -1.697277 | -2.322448 | H | -1.648807 | 0.530713  | -2.774194 | H | -2.198784 | 1.123324  | -2.122747 |
| H | -1.899661 | -2.726055 | -0.096947 | H | -1.952553 | 1.708650  | -2.305160 | H | 1.797749  | 2.686533  | 0.022549  | H | 1.673555  | 2.702911  | 0.456689  |
| H | -1.762463 | -2.295408 | -1.631104 | H | -0.449058 | 1.932993  | -2.824377 | H | 1.761592  | 2.258558  | -1.550482 | H | 1.457884  | 2.638632  | -1.165412 |
| H | -0.593114 | -3.135838 | -0.931539 | H | -1.202071 | 0.536922  | -3.100434 | H | 0.508452  | 3.087152  | -0.909631 | H | 0.262812  | 3.219611  | -0.209382 |
| H | -3.215797 | 1.006238  | -0.163084 | H | 1.107017  | 3.237269  | 0.501871  | H | 3.119365  | -0.999819 | -0.258269 | H | 3.229457  | -0.670240 | -0.188265 |
| H | -3.203968 | -0.381492 | -0.953378 | H | 1.393170  | 2.916261  | -1.046675 | H | 3.055668  | 0.397122  | -1.086275 | H | 2.994481  | 0.471914  | -1.324773 |
| H | -3.295412 | -0.371823 | 0.641004  | H | -0.072894 | 3.369106  | -0.578522 | H | 3.225995  | 0.440801  | 0.521684  | H | 3.123416  | 0.890136  | 0.245973  |
| H | 1.818094  | 1.796077  | 2.111247  | H | -0.625761 | -1.734319 | 2.842492  | H | -1.834995 | -1.683488 | 2.012472  | H | -1.454740 | -2.474669 | 1.446029  |
| H | 0.596886  | 1.263221  | 2.999494  | H | -1.344768 | -0.317055 | 3.071266  | H | -0.632218 | -1.145303 | 2.975819  | H | -0.066294 | -2.306287 | 2.275907  |
| H | 1.862278  | 0.317851  | 2.724636  | H | -2.074108 | -1.457302 | 2.204214  | H | -1.904138 | -0.179746 | 2.627451  | H | -1.354995 | -1.379331 | 2.653437  |
| H | -1.826178 | -1.615592 | 2.246416  | H | -2.299696 | 2.402147  | 0.391091  | H | 1.837248  | 1.677694  | 2.016033  | H | 2.112721  | 0.867677  | 2.268085  |
| H | -0.603158 | -1.018591 | 3.090302  | H | -2.580140 | 1.435367  | 1.643941  | H | 0.631714  | 1.141949  | 2.977157  | H | 1.062197  | -0.061645 | 3.110055  |
| H | -1.864345 | -0.092945 | 2.739827  | H | -1.426171 | 2.556087  | 1.727303  | H | 1.901630  | 0.173348  | 2.629970  | H | 2.241178  | -0.757339 | 2.225871  |
| H | -1.630952 | 2.877574  | 0.233594  | H | 2.068424  | 1.426486  | 2.230658  | H | 1.619562  | -2.725813 | 0.259994  | H | 1.695045  | -2.553246 | -1.034744 |
| H | -1.815261 | 2.213861  | 1.678302  | H | 0.616352  | 1.717856  | 2.853487  | H | 1.879435  | -2.045183 | 1.717326  | H | 1.904807  | -2.546800 | 0.586671  |
| H | -0.464969 | 3.003040  | 1.323186  | H | 1.316977  | 0.291983  | 3.086257  | H | 0.495971  | -2.871279 | 1.440380  | H | 0.548990  | -3.191840 | -0.058991 |
| H | 1.633201  | -2.845875 | 0.467332  | H | -2.897982 | -0.924966 | -1.497023 | H | -1.620929 | 2.725402  | 0.267030  | H | -1.422943 | 2.463809  | 1.436110  |
| H | 1.811422  | -2.069404 | 1.855659  | H | -3.242013 | -1.253751 | 0.036736  | H | -1.879402 | 2.040461  | 1.722676  | H | -1.362771 | 1.371418  | 2.646867  |
| H | 0.463568  | -2.886434 | 1.559686  | H | -3.426563 | 0.236345  | -0.524735 | H | -0.496296 | 2.867755  | 1.446603  | H | -0.044310 | 2.274478  | 2.299875  |
| N | -1.068155 | 0.944741  | -2.341103 | N | 2.776933  | 0.553850  | -0.539438 | N | 0.999708  | -1.108944 | -2.238265 | N | 0.746356  | -0.138078 | -2.574133 |
| H | -0.394479 | 1.243797  | -3.057319 | H | 3.420243  | -0.243457 | -0.541945 | H | 0.305762  | -1.440158 | -2.920601 | H | -0.034649 | -0.263484 | -3.235842 |
| H | -1.679806 | 1.766696  | -2.254603 | H | 3.250592  | 1.229320  | 0.068310  | H | 1.557138  | -1.956072 | -2.001195 | H | 1.397875  | -0.909812 | -2.793411 |
| H | -1.662941 | 0.285889  | -2.860108 | H | 2.899679  | 0.953397  | -1.474361 | H | 1.648271  | -0.518067 | -2.776328 | H | 1.232712  | 0.711695  | -2.909222 |
| N | 2.787530  | -0.081665 | -0.121261 | N | -0.691529 | -2.755008 | -0.335296 | N | -2.710280 | 0.047497  | -0.225337 | N | -2.691004 | 0.085993  | 0.454766  |
| H | 3.204812  | 0.302351  | -0.977474 | H | 0.081317  | -3.354686 | -0.638638 | H | -3.053805 | -0.388618 | -1.093625 | H | -3.256940 | -0.335171 | -0.295520 |
| H | 3.217729  | -1.012972 | -0.071616 | H | -1.401179 | -2.907455 | -1.057358 | H | -3.124517 | 0.993567  | -0.242390 | H | -3.044965 | 1.056463  | 0.517145  |
| H | 3.293973  | 0.428947  | 0.612138  | H | -1.068795 | -3.254038 | 0.476720  | H | -3.223806 | -0.460375 | 0.513542  | H | -3.038070 | -0.376008 | 1.305791  |



**Table S3.** Energies (hartrees) for the  $\text{Th}(\text{12C4X})_2^q$  and  $\text{Th}(\text{15C5X})_2^q$  species ( $q = 4+, 3+, 2+, 1+, 0$  and  $X = \text{N}, \text{O}$ ). Different spin states are reported (spin is given in parenthesis).

| $q$          | $\text{Th}(\text{12C4N})_2$ | $\text{Th}(\text{15C5N})_2$ | $\text{Th}(\text{12C4O})_2$ | $\text{Th}(\text{15C5O})_2$ |
|--------------|-----------------------------|-----------------------------|-----------------------------|-----------------------------|
| 4<br>(S=0)   | -1476.839126                | -1744.736150                | -1635.730076                | -1943.393506                |
| 3<br>(S=1/2) | -1477.326154                | -1745.193644                | -1636.233438                | -1943.850463                |
| 2<br>(S=0)   | -1477.664916                | -1745.485247                | -1636.564960                | -1944.145241                |
| 2<br>(S=1)   | -1477.667265                | -1745.476753                | -1636.566613                | -1944.140814                |
| 1<br>(S=1/2) | -1477.849360                | -1745.657442                | -1636.749266                | -1944.296001                |
| 1<br>(S=3/2) | -1477.851669                | -1745.651736                | -1636.737169                | -1944.287642                |
| 0<br>(S=0)   | -1477.943915                | -1745.740132                | -1636.813739                | -1944.371739                |
| 0<br>(S=1)   | -1477.944112                | -1745.750461                | -1636.813744                | -1944.366650                |
| 0<br>(S=2)   | -1477.942209                | -1745.745896                | -1636.804662                | -1944.362478                |

**Table S4.** Cartesian coordinates (Å) for the Th(12C4X)<sub>2</sub><sup>q</sup> and Th(15C5X)<sub>2</sub><sup>q</sup> species ( $q = 4+, 3+, 2+, 1+, 0$  and X = N, O). Different spin states are reported (spin is given in parenthesis).

| $q$        | Th(12C4O) <sub>2</sub>          | Th(15C5O) <sub>2</sub>          | Th(12C4N) <sub>2</sub>           | Th(15C5N) <sub>2</sub>          |
|------------|---------------------------------|---------------------------------|----------------------------------|---------------------------------|
| 4<br>(S=0) | O -1.940506 0.672850 1.411955   | O 0.410822 1.304549 -2.113994   | N 1.644022 0.484427 -1.980167    | N -0.275437 1.368031 -2.427902  |
|            | O -1.275173 -1.850496 0.898317  | O -0.629678 -1.093440 -2.218302 | N 1.422423 -2.160739 -0.600453   | N -1.433812 -1.214048 -1.907143 |
|            | O -1.275366 1.850461 -0.898025  | O -1.511226 2.048634 -0.509600  | N 1.852453 1.841190 0.564622     | N -1.614511 2.297354 0.010570   |
|            | O -1.940587 -0.672862 -1.411474 | O -1.309323 -2.198805 0.094962  | N 1.560788 -0.676384 1.958933    | N -1.273570 -2.453219 0.718064  |
|            | C -2.744791 1.851418 1.059500   | O -2.638051 -0.056674 0.602913  | C 2.138285 1.901109 -1.930272    | N -2.395008 0.008350 1.542016   |
|            | C -1.901315 -1.601124 2.204288  | C -1.596873 -2.187628 -2.294350 | C 2.224210 -1.932799 -1.856478   | C -2.561024 -2.041584 -1.398397 |
|            | C -1.941227 2.703123 0.099431   | C -1.496577 2.726784 -1.797926  | C 2.750466 2.232347 -0.582446    | C -2.188338 2.557311 -1.338216  |
|            | C -1.941116 -2.703198 -0.099042 | C -1.393454 -3.051555 -1.079707 | C 2.232847 -2.626946 0.582435    | C -2.057827 -3.063483 -0.402174 |
|            | C -1.901649 1.601084 -2.203922  | C 0.689070 0.537628 -3.320155   | C 2.654239 1.564942 1.812686     | C -0.711138 0.462372 -3.532446  |
|            | C -2.744772 -1.851502 -1.059036 | C -0.432663 -0.445234 -3.511409 | C 2.718146 -1.486078 1.456959    | C -1.854854 -0.419645 -3.095380 |
|            | C -2.724111 0.332095 -2.142378  | C -2.732447 2.283270 0.253948   | C 1.978900 0.550144 2.716436     | C -2.686707 2.386247 1.043798   |
|            | C -2.723909 -0.332211 2.142843  | C -2.355325 -2.342584 1.088538  | C 2.760517 -0.518662 -1.975330   | C -2.080569 -2.373164 1.965947  |
|            | H -2.981322 2.418850 1.971254   | C -3.541171 1.022997 0.250191   | H 1.287538 2.560144 -2.156682    | C -3.385838 1.060290 1.198077   |
|            | H -3.682687 1.488978 0.615806   | C -3.382808 -1.283473 0.816905  | H 2.882551 2.080560 -2.721009    | C -3.095558 -1.267375 1.851694  |
|            | H -1.066593 -1.528160 2.916054  | C -0.077898 2.671232 -2.283926  | H 1.569546 -2.161057 -2.711267   | C -1.088821 2.622920 -2.369195  |
|            | H -2.513681 -2.465788 2.495020  | H 0.001203 2.967551 -3.337167   | H 3.056525 -2.649816 -1.908908   | H -1.511325 2.854897 -3.357364  |
|            | H -2.578225 3.438659 -0.410426  | H -1.413815 -2.768172 -3.209255 | H 3.701731 1.704032 -0.453345    | H -3.060253 -2.562426 -2.229387 |
|            | H -1.130387 3.243003 0.604771   | H -2.603830 -1.749202 -2.348290 | H 2.994717 3.303019 -0.541416    | H -3.303625 -1.362903 -0.961001 |
|            | H -2.578048 -3.438743 0.410884  | H -1.809273 3.771902 -1.666209  | H 3.089527 -3.227422 0.242976    | H -2.745759 3.506054 -1.341346  |
|            | H -1.130309 -3.243060 -0.604455 | H -2.201651 2.223844 -2.475822  | H 1.596763 -3.305964 1.170285    | H -2.914504 1.768012 -1.566555  |
|            | H -1.067001 1.528196 -2.915783  | H -2.223122 -3.761638 -0.970244 | H 2.838954 2.491572 2.373560     | H -2.902900 -3.648019 -0.010406 |
|            | H -2.514121 2.465702 -2.494569  | H -0.455387 -3.614774 -1.138178 | H 3.640018 1.202986 1.500385     | H -1.420869 -3.795489 -0.922957 |
|            | H -2.981313 -2.418917 -1.970798 | H 1.651404 0.037841 -3.153336   | H 3.299034 -1.886704 2.301150    | H 0.147766 -0.163301 -3.823784  |
|            | H -3.682671 -1.489144 -0.615280 | H 0.793495 1.208073 -4.182071   | H 3.392699 -0.824012 0.902679    | H -0.986749 1.039180 -4.426829  |
|            | H -3.671082 0.471431 -1.602247  | H -1.376218 0.034665 -3.810413  | H 2.660912 0.286089 3.539037     | H -2.744102 0.163437 -2.827713  |
|            | H -2.943749 -0.038868 -3.153939 | H -0.166169 -1.203938 -4.261051 | H 1.078140 0.971074 3.188462     | H -2.155455 -1.086414 -3.916829 |
|            | H -2.943531 0.038694 3.154429   | H -3.293516 3.117432 -0.184957  | H 3.356875 -0.426658 -2.895165   | H -3.411214 3.172514 0.786081   |
|            | H -3.670892 -0.471610 1.602749  | H -2.431941 2.560175 1.268776   | H 3.435400 -0.283618 -1.144524   | H -2.236956 2.698987 1.997905   |
|            | Th -0.000022 -0.000003 0.000037 | H -1.871467 -2.204356 2.063815  | Th -0.000322 -0.001221 -0.013429 | H -1.399273 -2.178719 2.810217  |
|            | H 2.980871 2.419003 -1.971409   | H -2.779997 -3.353854 1.057509  | H 1.193514 0.385670 -2.897306    | H -2.573287 -3.332680 2.181357  |
|            | H 2.943088 0.038875 -3.154595   | H -4.352675 1.085991 0.989756   | H 1.303960 2.683078 0.775886     | H -4.166860 1.135650 1.969749   |
|            | C 2.744518 1.851547 -1.059624   | H -3.980705 0.803153 -0.734847  | H 1.087334 -1.274927 2.646001    | H -3.893493 0.763889 0.269609   |
|            | H 1.130127 3.243065 -0.604635   | H -3.976639 -1.498594 -0.084832 | H 0.826045 -2.961588 -0.826985   | H -3.821219 -1.472601 1.055969  |
|            | C 2.723643 -0.332062 -2.142982  | H -4.069880 -1.159046 1.666690  | H -1.281441 -2.954797 -1.572983  | H -3.676615 -1.178630 2.781272  |
|            | O 1.940263 0.672921 -1.411959   | H 0.570178 3.319766 -1.683993   | H -1.300555 -2.455564 1.326708   | H -0.410860 3.457197 -2.130805  |
|            | H 1.066346 -1.528163 -2.915997  | Th -0.000094 0.008249 -0.000056 | H -1.194491 -0.983382 -2.751396  | Th 0.000076 0.013505 0.000053   |
|            | C 1.941055 2.703199 -0.099422   | O -0.412394 1.305644 2.113055   | C -2.134394 -2.266018 -1.487743  | N 0.275017 1.361992 2.431042    |
|            | H 3.682508 1.489169 -0.616078   | O 0.631791 -1.090581 2.218823   | N -1.851249 -1.680202 0.939574   | N 1.434313 -1.218340 1.904236   |
|            | C 1.901160 -1.601053 -2.204331  | O 1.507502 2.051946 0.507395    | N -1.644765 -0.889746 -1.833590  | N 1.613545 2.297641 -0.004886   |
|            | H 3.670717 -0.471387 -1.603029  | O 1.312381 -2.197225 -0.093937  | H -1.084333 -0.279656 3.324647   | N 1.274484 -2.450883 -0.723932  |
|            | H 2.578092 3.438739 0.410381    | O 2.638103 -0.053457 -0.601393  | H -2.982879 -3.349422 0.165906   | N 2.394891 0.012948 -1.542018   |
|            | H 2.513564 -2.465668 -2.495127  | C 1.600703 -2.183282 2.295376   | C -2.745259 -2.309883 -0.099660  | C 2.561895 -2.044087 1.393406   |
|            | O 1.275354 1.850466 0.898078    | C 1.492353 2.730896 1.795258    | H -2.878634 -2.609250 -2.222391  | C 2.187566 2.554490 1.344408    |
|            | O 1.275186 -1.850452 -0.898288  | C 1.397696 -3.048538 1.081640   | C -1.982469 0.034301 2.771199    | C 2.058978 -3.063721 0.394748   |

|              |                                                                                                                                                                                                                                                                                                                                                                                                                                                                                                                                            |                                                                                                                                                                                                                                                                                                                                                                                                                                                                                                                                                                                                                                                                                                                                                                                                                                                                                                                        |                                                                                                                                                                                                                                                                                                                                                                                                                                                                                                                                                                                                                                                                                                                                  |                                                                                                                                                                                                                                                                                                                                                                                                                                                                                                                                                                                                                                                                                                                                                                                                                                                                                                                                                                                                                                                                                                                                                                                                                                                                      |
|--------------|--------------------------------------------------------------------------------------------------------------------------------------------------------------------------------------------------------------------------------------------------------------------------------------------------------------------------------------------------------------------------------------------------------------------------------------------------------------------------------------------------------------------------------------------|------------------------------------------------------------------------------------------------------------------------------------------------------------------------------------------------------------------------------------------------------------------------------------------------------------------------------------------------------------------------------------------------------------------------------------------------------------------------------------------------------------------------------------------------------------------------------------------------------------------------------------------------------------------------------------------------------------------------------------------------------------------------------------------------------------------------------------------------------------------------------------------------------------------------|----------------------------------------------------------------------------------------------------------------------------------------------------------------------------------------------------------------------------------------------------------------------------------------------------------------------------------------------------------------------------------------------------------------------------------------------------------------------------------------------------------------------------------------------------------------------------------------------------------------------------------------------------------------------------------------------------------------------------------|----------------------------------------------------------------------------------------------------------------------------------------------------------------------------------------------------------------------------------------------------------------------------------------------------------------------------------------------------------------------------------------------------------------------------------------------------------------------------------------------------------------------------------------------------------------------------------------------------------------------------------------------------------------------------------------------------------------------------------------------------------------------------------------------------------------------------------------------------------------------------------------------------------------------------------------------------------------------------------------------------------------------------------------------------------------------------------------------------------------------------------------------------------------------------------------------------------------------------------------------------------------------|
|              | C 1.901808 1.601086 2.203904<br>H 2.514212 2.465772 2.494490<br>C 1.941308 -2.703115 0.099001<br>H 2.578190 -3.438624 -0.411039<br>O 1.940890 -0.672928 1.411669<br>H 1.067260 1.528097 2.915873<br>H 3.671276 0.471630 1.601908<br>C 2.724455 0.332207 2.142280<br>H 3.682872 -1.488926 0.614949<br>H 1.130609 -3.243030 0.604531<br>C 2.745123 -1.851436 1.058896<br>H 2.944387 -0.038651 3.153816<br>H 2.981946 -2.418909 1.970548                                                                                                      | C -0.689477 0.539200 3.319770<br>C 0.433602 -0.442059 3.511657<br>C 2.728626 2.287095 -0.256066<br>C 2.359299 -2.339788 -1.086671<br>C 3.539373 1.028129 -0.249644<br>C 3.385016 -1.279058 -0.814791<br>C 0.074049 2.673260 2.282034<br>H -0.004948 2.969977 3.335169<br>H 1.419099 -2.763190 3.210971<br>H 2.607016 -1.743280 2.348243<br>H 1.803199 3.776467 1.662729<br>H 2.198585 2.229598 2.473174<br>H 2.227774 -3.758228 0.972656<br>H 0.460058 -3.612375 1.141043<br>H -1.651198 0.038068 3.153497<br>H -0.794605 1.210109 4.181237<br>H 1.376455 0.039227 3.810622<br>H 0.167983 -1.200866 4.261498<br>H 3.288121 3.123073 0.181406<br>H 2.428191 2.561433 -1.271618<br>H 1.875899 -2.202639 -2.062309<br>H 2.785519 -3.350395 -1.054945<br>H 4.351289 1.091156 -0.988745<br>H 3.978538 0.810479 0.736040<br>H 3.978851 -1.493000 0.087216<br>H 4.072194 -1.153712 -1.664353<br>H -0.575509 3.320411 1.682219 | C -2.657096 -1.146790 2.098378<br>N -1.560288 1.073408 1.773772<br>H -1.086115 1.801956 2.320345<br>H -2.846070 -1.934749 2.840523<br>H -0.823900 2.715450 -1.436901<br>N -1.422554 1.984161 -1.043178<br>H -1.581027 1.543380 -3.106697<br>C -2.763833 0.089311 -2.037214<br>C -2.230534 1.497882 -2.219378<br>H -3.699900 -1.772237 -0.084394<br>H -2.666492 0.466459 3.517437<br>H -3.361368 -0.195162 -2.916013<br>H -1.584735 3.475927 0.448732<br>C -2.226393 2.692796 0.017094<br>H -3.640839 -0.857007 1.712841<br>C -2.715364 1.762765 1.111606<br>H -3.436977 0.032545 -1.174294<br>H -3.391674 1.000771 0.708348<br>H -3.064843 2.187128 -2.415439<br>H -3.295203 2.333417 1.852364<br>H -3.080771 3.214251 -0.438803 | C 0.710678 0.453756 3.533494<br>C 1.854847 -0.426745 3.094523<br>C 2.685315 2.389765 -1.038231<br>C 2.081451 -2.367580 -1.971622<br>C 3.385247 1.064623 -1.195881<br>C 3.095992 -1.261690 -1.854749<br>C 1.088142 2.617217 2.375657<br>H 1.510668 2.846622 3.364414<br>H 3.061446 -2.566747 2.223059<br>H 3.304119 -1.363984 0.957590<br>H 2.744688 3.503398 1.349763<br>H 2.913999 1.764849 1.570733<br>H 2.904190 -3.647083 0.001522<br>H 1.422248 -3.797160 0.913821<br>H -0.148083 -0.172945 3.823028<br>H 0.985823 1.028460 4.429369<br>H 2.743927 0.157347 2.828489<br>H 2.155512 -1.095441 3.914378<br>H 3.409340 3.175955 -0.778938<br>H 2.234925 2.704337 -1.991419<br>H 1.400046 -2.171425 -2.815410<br>H 2.574564 -3.326389 -2.189289<br>H 4.165966 1.142257 -1.967631<br>H 3.893360 0.766304 -0.268282<br>H 3.821780 -1.468506 -1.059550<br>H 3.676955 -1.170503 -2.784153<br>H 0.410014 3.452000 2.139539<br>H 0.749212 -1.887842 2.271091<br>H -0.651421 1.684876 2.707719<br>H 1.002545 3.097311 -0.184806<br>H 0.543252 -3.128382 -0.936695<br>H 0.650807 1.691849 -2.704153<br>H -1.004204 3.097067 0.192744<br>H -0.748419 -1.882293 -2.275756<br>H -0.542155 -3.131034 0.929066<br>H -2.004070 0.294126 2.443342<br>H 2.003659 0.300557 -2.442627 |
| 3<br>(S=1/2) | O 2.081076 -0.821358 1.291993<br>O 1.359358 1.772330 1.096698<br>O 1.355626 -1.772012 -1.097246<br>O 2.082796 0.819869 -1.292224<br>C 2.888666 -1.917593 0.798177<br>C 2.006026 1.351988 2.329832<br>C 2.056574 -2.683973 -0.207666<br>C 2.061706 2.683014 0.206861<br>C 2.002957 -1.352884 -2.330468<br>C 2.892318 1.914902 -0.798891<br>C 2.839372 -0.107575 -2.109403<br>C 2.839712 0.104866 2.108792<br>H 3.176700 -2.574826 1.631717<br>H 3.804349 -1.503485 0.351304<br>H 1.184838 1.172690 3.034250<br>H 2.625901 2.169061 2.724460 | O -0.034789 -1.320132 -2.209898<br>O 0.766351 1.248340 -2.276122<br>O 1.546775 -2.191184 -0.238599<br>O 1.371232 2.212433 0.187604<br>O 2.625861 -0.015767 0.953786<br>C 1.803323 2.242612 -2.191464<br>C 1.832775 -2.685661 -1.561388<br>C 1.544098 3.072016 -0.960467<br>C -0.256407 -0.551134 -3.416033<br>C 0.799739 0.518034 -3.513700<br>C 2.634844 -2.365117 0.695026<br>C 2.340331 2.309874 1.247552<br>C 3.496725 -1.132582 0.715984<br>C 3.357976 1.213488 1.085987<br>C 0.544574 -2.641765 -2.336973<br>H 0.720129 -2.876979 -3.394424                                                                                                                                                                                                                                                                                                                                                                      | N -1.733434 0.675174 1.934545<br>N -1.507295 -2.095166 0.825000<br>N -1.892039 1.825027 -0.763803<br>N -1.597869 -0.870873 -1.901017<br>C -2.186015 2.079368 1.723634<br>C -2.338585 -1.729036 2.014829<br>C -2.781747 2.296206 0.343175<br>C -2.274827 -2.663442 -0.327720<br>C -2.686208 1.383303 -1.952711<br>C -2.745951 -1.619824 -1.324794<br>C -2.008792 0.282347 -2.751413<br>C -2.853824 -0.301408 1.985466<br>H -1.315897 2.733616 1.880802<br>H -2.934037 2.369599 2.477903<br>H -1.713126 -1.875256 2.908440<br>H -3.188175 -2.421142 2.116125                                                                                                                                                                       | N 0.303037 -1.402595 -2.437083<br>N 1.316881 1.330248 -2.049942<br>N 1.619710 -2.362990 0.024030<br>N 1.324137 2.466556 0.668181<br>N 2.425428 -0.047270 1.597728<br>C 2.460966 2.115507 -1.538345<br>C 2.229446 -2.538634 -1.313649<br>C 2.024983 3.106262 -0.480033<br>C 0.655701 -0.491385 -3.555100<br>C 1.757939 0.464968 -3.167511<br>C 2.654721 -2.445468 1.082374<br>C 2.179724 2.372772 1.874194<br>C 3.372987 -1.128031 1.255013<br>C 3.155316 1.228620 1.759241<br>C 1.160695 -2.618007 -2.379549<br>H 1.626544 -2.813800 -3.356687                                                                                                                                                                                                                                                                                                                                                                                                                                                                                                                                                                                                                                                                                                                       |

|  |    |           |           |           |    |           |           |           |    |           |           |           |    |           |           |           |
|--|----|-----------|-----------|-----------|----|-----------|-----------|-----------|----|-----------|-----------|-----------|----|-----------|-----------|-----------|
|  | H  | 2.676629  | -3.377178 | -0.791713 | H  | 1.777289  | 2.884288  | -3.085185 | H  | -3.731815 | 1.756675  | 0.260646  | H  | 2.964741  | 2.659074  | -2.353924 |
|  | H  | 1.269513  | -3.266193 | 0.289344  | H  | 2.781471  | 1.735771  | -2.150834 | H  | -3.032757 | 3.360066  | 0.226101  | H  | 3.188770  | 1.400338  | -1.133515 |
|  | H  | 2.683026  | 3.375276  | 0.790682  | H  | 2.195587  | -3.721950 | -1.498188 | H  | -3.140569 | -3.238480 | 0.034307  | H  | 2.841655  | -3.454188 | -1.348246 |
|  | H  | 1.275426  | 3.266459  | -0.289970 | H  | 2.611271  | -2.063574 | -2.030638 | H  | -1.616783 | -3.384493 | -0.835848 | H  | 2.904576  | -1.694620 | -1.498160 |
|  | H  | 1.181975  | -1.171589 | -3.034615 | H  | 2.375522  | 3.768428  | -0.790611 | H  | -2.902152 | 2.227453  | -2.622857 | H  | 2.898774  | 3.678593  | -0.134084 |
|  | H  | 2.620890  | -2.171280 | -2.725376 | H  | 0.618310  | 3.650525  | -1.070861 | H  | -3.660172 | 1.033903  | -1.592853 | H  | 1.353921  | 3.852176  | -0.934878 |
|  | H  | 3.181378  | 2.571353  | -1.632693 | H  | -1.259180 | -0.114773 | -3.322922 | H  | -3.329462 | -2.114307 | -2.117000 | H  | -0.244080 | 0.081537  | -3.829861 |
|  | H  | 3.807354  | 1.499376  | -0.351981 | H  | -0.241072 | -1.209030 | -4.293907 | H  | -3.416545 | -0.903415 | -0.839563 | H  | 0.944605  | -1.060547 | -4.451333 |
|  | H  | 3.780018  | -0.332773 | -1.585874 | H  | 1.803717  | 0.084276  | -3.653604 | H  | -2.693228 | -0.041724 | -3.550945 | H  | 2.652395  | -0.082292 | -2.843491 |
|  | H  | 3.084229  | 0.358213  | -3.075284 | H  | 0.590708  | 1.195529  | -4.355745 | H  | -1.104859 | 0.662332  | -3.250811 | H  | 2.059287  | 1.066926  | -4.038518 |
|  | H  | 3.083853  | -0.361215 | 3.074711  | H  | 3.220454  | -3.255104 | 0.429035  | H  | -3.486149 | -0.127461 | 2.869927  | H  | 3.386521  | -3.237069 | 0.857809  |
|  | H  | 3.780665  | 0.328002  | 1.584946  | H  | 2.176365  | -2.529452 | 1.675627  | H  | -3.488691 | -0.142823 | 1.107599  | H  | 2.173691  | -2.745368 | 2.025414  |
|  | Th | 0.000000  | 0.001571  | 0.000010  | H  | 1.778157  | 2.195075  | 2.183039  | Th | 0.000002  | -0.000422 | 0.035186  | H  | 1.527381  | 2.216133  | 2.747813  |
|  | H  | -3.176688 | -2.574818 | -1.631737 | H  | 2.816237  | 3.299220  | 1.247197  | H  | -1.304040 | 0.662615  | 2.864105  | H  | 2.719898  | 3.314951  | 2.053567  |
|  | H  | -3.083817 | -0.361204 | -3.074730 | H  | 4.243929  | -1.207457 | 1.520869  | H  | -1.362254 | 2.645027  | -1.067063 | H  | 4.156773  | -1.234464 | 2.021788  |
|  | C  | -2.888661 | -1.917585 | -0.798194 | H  | 4.029914  | -0.979214 | -0.236667 | H  | -1.123268 | -1.522676 | -2.532321 | H  | 3.884177  | -0.842909 | 0.325432  |
|  | H  | -1.269519 | -3.266189 | -0.289338 | H  | 3.978310  | 1.362767  | 0.186904  | H  | -0.926364 | -2.869659 | 1.149945  | H  | 3.810359  | 1.364127  | 0.889462  |
|  | C  | -2.839685 | 0.104875  | -2.108808 | H  | 4.022788  | 1.163961  | 1.961999  | H  | 1.317239  | -2.733110 | 1.881432  | H  | 3.814920  | 1.203982  | 2.640389  |
|  | O  | -2.081061 | -0.821354 | -1.292003 | H  | -0.179560 | -3.358870 | -1.929182 | H  | 1.363874  | -2.645409 | -1.066203 | H  | 0.512201  | -3.484895 | -2.177189 |
|  | H  | -1.184795 | 1.172693  | -3.034245 | Th | 0.000059  | -0.005371 | -0.000094 | H  | 1.304221  | -0.661957 | 2.864494  | Th | 0.000365  | -0.013099 | 0.000560  |
|  | C  | -2.056585 | -2.683967 | 0.207661  | O  | 0.025045  | -1.311819 | 2.214581  | C  | 2.187032  | -2.078438 | 1.724318  | N  | -0.304435 | -1.393456 | 2.441867  |
|  | H  | -3.804348 | -1.503472 | -0.351332 | O  | -0.757759 | 1.262469  | 2.271318  | N  | 1.893234  | -1.825029 | -0.763230 | N  | -1.316095 | 1.338797  | 2.044477  |
|  | C  | -2.005991 | 1.351993  | -2.329838 | O  | -1.561210 | -2.181362 | 0.246285  | N  | 1.733661  | -0.674442 | 1.934956  | N  | -1.621383 | -2.362268 | -0.015232 |
|  | H  | -3.780641 | 0.328015  | -1.584971 | O  | -1.356886 | 2.220658  | -0.195474 | H  | 1.105765  | -0.663612 | -3.250909 | N  | -1.323176 | 2.465221  | -0.677909 |
|  | H  | -2.676650 | -3.377169 | 0.791700  | O  | -2.625887 | -0.002377 | -0.952801 | H  | 3.034850  | -3.358985 | 0.227288  | N  | -2.425221 | -0.051983 | -1.597581 |
|  | H  | -2.625858 | 2.169069  | -2.724474 | C  | -1.787776 | 2.263635  | 2.183407  | C  | 2.783094  | -2.295259 | 0.343999  | C  | -2.460017 | 2.122497  | 1.530149  |
|  | O  | -1.355646 | -1.772006 | 1.097249  | C  | -1.851071 | -2.667966 | 1.571136  | H  | 2.935088  | -2.368149 | 2.478755  | C  | -2.232404 | -2.530886 | 1.322712  |
|  | O  | -1.359338 | 1.772334  | -1.096696 | C  | -1.523995 | 3.086303  | 0.948820  | C  | 2.009268  | -0.282890 | -2.751287 | C  | -2.023903 | 3.109140  | 0.468007  |
|  | C  | -2.002992 | -1.352877 | 2.330463  | C  | 0.253475  | -0.539545 | 3.417409  | C  | 2.687217  | -1.383253 | -1.952202 | C  | -0.655095 | -0.477243 | 3.556404  |
|  | H  | -2.620933 | -2.171271 | 2.725363  | C  | -0.795095 | 0.537353  | 3.511841  | N  | 1.597467  | 0.870340  | -1.901298 | C  | -1.757011 | 0.478239  | 3.165795  |
|  | C  | -2.061695 | 2.683021  | -0.206868 | C  | -2.650800 | -2.350824 | -0.686388 | H  | 1.122710  | 1.521663  | -2.532982 | C  | -2.655444 | -2.448550 | -1.074138 |
|  | H  | -2.683004 | 3.375285  | -0.790697 | C  | -2.324875 | 2.320246  | -1.256270 | H  | 2.903642  | -2.227482 | -2.622093 | C  | -2.179023 | 2.366831  | -1.883430 |
|  | O  | -2.082811 | 0.819873  | 1.292214  | C  | -3.504242 | -1.112496 | -0.711227 | H  | 0.924281  | 2.869144  | 1.148964  | C  | -3.373254 | -1.131594 | -1.252516 |
|  | H  | -1.182018 | -1.171584 | 3.034621  | C  | -3.349781 | 1.231188  | -1.090529 | N  | 1.506160  | 2.095222  | 0.824380  | C  | -3.154850 | 1.223373  | -1.763978 |
|  | H  | -3.780041 | -0.332761 | 1.585849  | C  | -0.563286 | -2.628897 | 2.347698  | H  | 1.711887  | 1.876360  | 2.907942  | C  | -1.164432 | -2.607501 | 2.389594  |
|  | C  | -2.839400 | -0.107565 | 2.109387  | H  | -0.741581 | -2.857485 | 3.406152  | C  | 2.853518  | 0.302750  | 1.985714  | H  | -1.631215 | -2.797711 | 3.367380  |
|  | H  | -3.807355 | 1.499390  | 0.351952  | H  | -1.756542 | 2.908690  | 3.074523  | C  | 2.337522  | 1.730120  | 2.014457  | H  | -2.963377 | 2.669347  | 2.343785  |
|  | H  | -1.275419 | 3.266463  | 0.289974  | H  | -2.769478 | 1.763484  | 2.145625  | H  | 3.732806  | -1.755104 | 0.261427  | H  | -3.188128 | 1.405978  | 1.128295  |
|  | C  | -2.892323 | 1.914912  | 0.798873  | H  | -2.220532 | -3.702172 | 1.512388  | H  | 2.693705  | 0.041419  | -3.550729 | H  | -2.846376 | -3.445119 | 1.360974  |
|  | H  | -3.084265 | 0.358226  | 3.075265  | H  | -2.625911 | -2.038868 | 2.037097  | H  | 3.485822  | 0.129446  | 2.870316  | H  | -2.905983 | -1.684713 | 1.503002  |
|  | H  | -3.181389 | 2.571363  | 1.632673  | H  | -2.351469 | 3.786789  | 0.776408  | H  | 1.614873  | 3.384245  | -0.836771 | H  | -2.897529 | 3.680551  | 0.120102  |
|  |    |           |           |           | H  | -0.594787 | 3.659880  | 1.056302  | C  | 2.273341  | 2.663733  | -0.328424 | H  | -1.352475 | 3.856472  | 0.919961  |
|  |    |           |           |           | H  | 1.259099  | -0.110479 | 3.321249  | H  | 3.660978  | -1.033235 | -1.592393 | H  | 0.245384  | 0.096174  | 3.827781  |
|  |    |           |           |           | H  | 0.234766  | -1.193820 | 4.297915  | C  | 2.745098  | 1.620074  | -1.325152 | H  | -0.943524 | -1.042359 | 4.455346  |
|  |    |           |           |           | H  | -1.801939 | 0.111165  | 3.654410  | H  | 3.488583  | 0.144186  | 1.107987  | H  | -2.652024 | -0.069793 | 2.844600  |
|  |    |           |           |           | H  | -0.580608 | 1.216731  | 4.350990  | H  | 3.415947  | 0.904138  | -0.839577 | H  | -2.057395 | 1.083861  | 4.034585  |
|  |    |           |           |           | H  | -3.242470 | -3.235875 | -0.417307 | H  | 3.186705  | 2.422754  | 2.115549  | H  | -3.387706 | -3.239061 | -0.847210 |
|  |    |           |           |           | H  | -2.193979 | -2.521482 | -1.666682 | H  | 3.328484  | 2.114576  | -2.117437 | H  | -2.173545 | -2.752279 | -2.015490 |
|  |    |           |           |           | H  | -1.763152 | 2.197770  | -2.191039 | H  | 3.138719  | 3.239401  | 0.033469  | H  | -1.526804 | 2.206687  | -2.756517 |
|  |    |           |           |           | H  | -2.794104 | 3.312764  | -1.260170 |    |           |           |           | H  | -2.719084 | 3.308390  | -2.066386 |
|  |    |           |           |           | H  | -4.252102 | -1.184990 | -1.515729 |    |           |           |           | H  | -4.155931 | -1.240629 | -2.020053 |
|  |    |           |           |           | H  | -4.036277 | -0.952371 | 0.240946  |    |           |           |           | H  | -3.885825 | -0.843210 | -0.324708 |
|  |    |           |           |           | H  | -3.969537 | 1.388350  | -0.192393 |    |           |           |           | H  | -3.809863 | 1.362310  | -0.894725 |

|            |                                                                                                                                                                                                                                                                                                                                                                                                                                                                                                                                                                                                                                                                                                                                                                                                                                                                                                                                                                                                                                                                                                                                                                                                                                                                                                                                                                                                                                   |                                                                                                                                                                                                                                                                                                                                                                                                                                                                                                                                                                                                                                                                                                                                                                                                                                                                                                                                                                                                                                                                                                                                                                                                                                                                                                                                                                                                                                  |                                                                                                                                                                                                                                                                                                                                                                                                                                                                                                                                                                                                                                                                                                                                                                                                                                                                                                                                                                                                                                                                                                                                                                                                                                                                                                                                                                                                               |                                                                                                                                                                                                                                                                                                                                                                                                                                                                                                                                                                                                                                                                                                                                                                                                                                                                                                                                                                                                                                                                                                                                                                                                                                                                                                                                                                                                           |
|------------|-----------------------------------------------------------------------------------------------------------------------------------------------------------------------------------------------------------------------------------------------------------------------------------------------------------------------------------------------------------------------------------------------------------------------------------------------------------------------------------------------------------------------------------------------------------------------------------------------------------------------------------------------------------------------------------------------------------------------------------------------------------------------------------------------------------------------------------------------------------------------------------------------------------------------------------------------------------------------------------------------------------------------------------------------------------------------------------------------------------------------------------------------------------------------------------------------------------------------------------------------------------------------------------------------------------------------------------------------------------------------------------------------------------------------------------|----------------------------------------------------------------------------------------------------------------------------------------------------------------------------------------------------------------------------------------------------------------------------------------------------------------------------------------------------------------------------------------------------------------------------------------------------------------------------------------------------------------------------------------------------------------------------------------------------------------------------------------------------------------------------------------------------------------------------------------------------------------------------------------------------------------------------------------------------------------------------------------------------------------------------------------------------------------------------------------------------------------------------------------------------------------------------------------------------------------------------------------------------------------------------------------------------------------------------------------------------------------------------------------------------------------------------------------------------------------------------------------------------------------------------------|---------------------------------------------------------------------------------------------------------------------------------------------------------------------------------------------------------------------------------------------------------------------------------------------------------------------------------------------------------------------------------------------------------------------------------------------------------------------------------------------------------------------------------------------------------------------------------------------------------------------------------------------------------------------------------------------------------------------------------------------------------------------------------------------------------------------------------------------------------------------------------------------------------------------------------------------------------------------------------------------------------------------------------------------------------------------------------------------------------------------------------------------------------------------------------------------------------------------------------------------------------------------------------------------------------------------------------------------------------------------------------------------------------------|-----------------------------------------------------------------------------------------------------------------------------------------------------------------------------------------------------------------------------------------------------------------------------------------------------------------------------------------------------------------------------------------------------------------------------------------------------------------------------------------------------------------------------------------------------------------------------------------------------------------------------------------------------------------------------------------------------------------------------------------------------------------------------------------------------------------------------------------------------------------------------------------------------------------------------------------------------------------------------------------------------------------------------------------------------------------------------------------------------------------------------------------------------------------------------------------------------------------------------------------------------------------------------------------------------------------------------------------------------------------------------------------------------------|
|            |                                                                                                                                                                                                                                                                                                                                                                                                                                                                                                                                                                                                                                                                                                                                                                                                                                                                                                                                                                                                                                                                                                                                                                                                                                                                                                                                                                                                                                   | H -4.014540 1.182231 -1.966612<br>H 0.156418 -3.353050 1.944514                                                                                                                                                                                                                                                                                                                                                                                                                                                                                                                                                                                                                                                                                                                                                                                                                                                                                                                                                                                                                                                                                                                                                                                                                                                                                                                                                                  |                                                                                                                                                                                                                                                                                                                                                                                                                                                                                                                                                                                                                                                                                                                                                                                                                                                                                                                                                                                                                                                                                                                                                                                                                                                                                                                                                                                                               | H -3.814463 1.195519 -2.645036<br>H -0.517572 -3.476634 2.191711<br>H -0.665174 2.013590 2.457029<br>H 0.626205 -1.741295 2.661576<br>H -1.026499 -3.182712 -0.147202<br>H -0.574948 3.104060 -0.938639<br>H -0.628036 -1.749743 -2.656054<br>H 1.024066 -3.182170 0.160357<br>H 0.666537 2.003744 -2.465534<br>H 0.575454 3.105813 0.926434<br>H 2.069782 -0.266839 2.531476<br>H -2.068397 -0.274316 -2.530210                                                                                                                                                                                                                                                                                                                                                                                                                                                                                                                                                                                                                                                                                                                                                                                                                                                                                                                                                                                          |
| 2<br>(S=0) | O -2.236502 1.088546 1.092190<br>O -1.516254 -1.471937 1.467033<br>O -1.516256 1.471937 -1.467032<br>O -2.236501 -1.088547 -1.092190<br>C -3.019964 2.044474 0.363914<br>C -2.190286 -0.805228 2.548438<br>C -2.190120 2.551162 -0.796643<br>C -2.190117 -2.551163 0.796644<br>C -2.190288 0.805227 -2.548437<br>C -3.019962 -2.044475 -0.363913<br>C -3.020067 -0.357030 -2.045555<br>C -3.020066 0.357029 2.045555<br>H -3.303696 2.881470 1.020891<br>H -3.943524 1.553639 0.018615<br>H -1.388795 -0.453297 3.209581<br>H -2.816946 -1.517292 3.104559<br>H -2.816688 3.109807 -1.506809<br>H -1.388521 3.210971 -0.442454<br>H -2.816685 -3.109808 1.506809<br>H -1.388517 -3.210971 0.442454<br>H -1.388796 0.453297 -3.209581<br>H -2.816948 1.517291 -3.104558<br>H -3.303694 -2.881472 -1.020890<br>H -3.943523 -1.553642 -0.018614<br>H -3.943560 -0.013372 -1.553443<br>H -3.303921 -1.011175 -2.884725<br>H -3.303921 1.011174 2.884726<br>H -3.943560 0.013370 1.553444<br>Th -0.000000 0.000001 0.000000<br>H 3.303860 2.884152 -1.012931<br>H 3.303757 1.019136 -2.882052<br>C 3.020027 2.045372 -0.358275<br>H 1.388658 3.209776 0.451276<br>C 3.020002 0.362670 -2.044662<br>O 2.236502 1.091531 -1.089211<br>H 1.388657 -0.444476 -3.210782<br>C 2.190202 2.548931 0.803655<br>H 3.943533 1.553506 -0.014297<br>C 2.190204 -0.798217 -2.550673<br>H 3.943550 0.017690 -1.553580<br>H 2.816804 3.105572 1.515363 | O -0.416021 -1.677803 -1.984082<br>O -1.049997 1.045751 -2.337098<br>O 2.092315 -1.562359 -0.830466<br>O 0.267585 2.596406 -0.395158<br>O 2.603382 1.129160 -0.112481<br>C -0.465392 2.302576 -2.695103<br>C 1.983678 -1.952618 -2.204469<br>C -0.430745 3.210685 -1.491979<br>C -1.379346 -1.233646 -2.954144<br>C -1.033861 0.146453 -3.450658<br>C 3.399553 -1.100049 -0.465094<br>C 1.475125 3.210676 0.075305<br>C 3.593104 0.357582 -0.797610<br>C 2.675618 2.503436 -0.494982<br>C 0.627114 -2.577117 -2.408005<br>H 0.492633 -2.840630 -3.466010<br>H -1.064117 2.776818 -3.490163<br>H 0.554812 2.111957 -3.069091<br>H 2.762566 -2.695245 -2.440439<br>H 2.106634 -1.066869 -2.847512<br>H 0.057392 4.155678 -1.767372<br>H -1.447881 3.431868 -1.143759<br>H -2.348416 -1.233122 -2.438373<br>H -1.426620 -1.942751 -3.791541<br>H -0.026357 0.155821 -3.900038<br>H -1.765685 0.476593 -4.205359<br>H 4.164282 -1.705728 -0.972946<br>H 3.487476 -1.260101 0.613856<br>H 1.452100 3.122643 1.169204<br>H 1.491142 4.276322 -0.190821<br>H 4.599652 0.677218 -0.481553<br>H 3.491738 0.536943 -1.880937<br>H 2.681237 2.568746 -1.596509<br>H 3.605306 2.952677 -0.109587<br>H 0.532424 -3.488561 -1.801726<br>Th 0.006353 -0.009379 -0.000399<br>O 1.534579 -0.857432 1.960794<br>O -0.046399 1.439318 2.366390<br>O -0.261003 -2.604298 0.794627<br>O -2.090588 1.554839 0.428713<br>O -2.591616 -1.156655 0.110754 | N 1.972667 -1.355481 -1.431762<br>N 1.796262 -1.608676 1.489947<br>N 1.979275 1.504635 -1.283615<br>N 1.710852 1.330580 1.567023<br>C 2.351104 -0.566769 -2.622150<br>C 2.666278 -2.470662 0.652169<br>C 2.878215 0.804743 -2.234738<br>C 2.509891 -0.800996 2.508309<br>C 2.714229 2.447879 -0.406509<br>C 2.902973 0.573902 2.000053<br>C 2.035705 2.629803 0.941212<br>C 3.128035 -1.784658 -0.620392<br>H 1.450912 -0.464604 -3.244333<br>H 3.115493 -1.082614 -3.227825<br>H 2.082481 -3.363482 0.385872<br>H 3.543942 -2.817925 1.220850<br>H 3.857170 0.700201 -1.751607<br>H 3.055053 1.396609 -3.145446<br>H 3.406712 -1.325971 2.874598<br>H 1.835345 -0.685657 3.369519<br>H 2.849180 3.432253 -0.879679<br>H 3.724169 2.047670 -0.257640<br>H 3.457041 1.112669 2.786234<br>H 3.582313 0.479154 1.145800<br>H 2.687835 3.241985 1.586621<br>H 1.091377 3.179782 0.819798<br>H 3.786533 -2.464899 -1.185276<br>H 3.727195 -0.899901 -0.376468<br>Th -0.000071 -0.131352 -0.005895<br>H 1.512781 -2.205269 -1.762261<br>H 1.327744 2.056945 -1.840722<br>H 1.176277 1.531409 2.413870<br>H 1.189448 -2.243480 2.005741<br>H -1.458282 -0.823752 3.173809<br>H -1.333148 1.837345 2.056615<br>H -1.516245 -2.389690 1.507983<br>C -2.356989 -0.856587 2.542052<br>N -1.983922 1.350122 1.440923<br>N -1.974946 -1.508061 1.272587<br>H -1.094322 3.253151 -0.460036<br>H -3.062852 1.036825 3.277562 | N 0.270074 1.406979 2.442874<br>N 1.166873 -1.426225 2.140666<br>N 1.628660 2.396390 0.005738<br>N 1.307058 -2.493880 -0.622527<br>N 2.461513 0.044849 -1.577111<br>C 2.298559 -2.245573 1.667945<br>C 2.210210 2.561777 1.352041<br>C 1.899133 -3.186008 0.549071<br>C 0.573255 0.488886 3.563298<br>C 1.637395 -0.522999 3.208185<br>C 2.676026 2.449319 -1.033171<br>C 2.228162 -2.389454 -1.771561<br>C 3.386714 1.123623 -1.190268<br>C 3.189083 -1.235271 -1.619229<br>C 1.123117 2.619929 2.403603<br>H 1.577400 2.813148 3.387982<br>H 2.734333 -2.838423 2.491851<br>H 3.066130 -1.544097 1.318725<br>H 2.812536 3.485617 1.412022<br>H 2.878463 1.713889 1.537416<br>H 2.776577 -3.781412 0.250494<br>H 1.169874 -3.918360 0.931886<br>H -0.354170 -0.043305 3.828690<br>H 0.876206 1.050508 4.461380<br>H 2.539863 -0.015594 2.844802<br>H 1.926198 -1.089517 4.109513<br>H 3.420017 3.231986 -0.809014<br>H 2.211129 2.745645 -1.985741<br>H 1.624145 -2.241910 -2.680855<br>H 2.790426 -3.325933 -1.918019<br>H 4.204313 1.236543 -1.923337<br>H 3.847845 0.831637 -0.237910<br>H 3.757463 -1.333855 -0.686017<br>H 3.925683 -1.253655 -2.439872<br>H 0.472944 3.485125 2.196006<br>Th 0.001360 0.005153 -0.000491<br>N -0.222435 1.373841 -2.465420<br>N -1.216524 -1.423928 -2.121988<br>N -1.546744 2.447837 -0.041223<br>N -1.393871 -2.442778 0.659341<br>N -2.457425 0.149074 1.578965 |

|            |                                                                                                                                                                                                                                                                                                                                                                                                                                                                                                                                               |                                                                                                                                                                                                                                                                                                                                                                                                                                                                                                                                                                                                                                                                                                                                                                                                                                                                                                                                                                                                                                     |                                                                                                                                                                                                                                                                                                                                                                                                                                                                                                                                                                                                                                                                                                                                                                                                                                                 |                                                                                                                                                                                                                                                                                                                                                                                                                                                                                                                                                                                                                                                                                                                                                                                                                                                                                                                                                                                                                                                                                                                                                                                                                                                                                                                                                                                                          |
|------------|-----------------------------------------------------------------------------------------------------------------------------------------------------------------------------------------------------------------------------------------------------------------------------------------------------------------------------------------------------------------------------------------------------------------------------------------------------------------------------------------------------------------------------------------------|-------------------------------------------------------------------------------------------------------------------------------------------------------------------------------------------------------------------------------------------------------------------------------------------------------------------------------------------------------------------------------------------------------------------------------------------------------------------------------------------------------------------------------------------------------------------------------------------------------------------------------------------------------------------------------------------------------------------------------------------------------------------------------------------------------------------------------------------------------------------------------------------------------------------------------------------------------------------------------------------------------------------------------------|-------------------------------------------------------------------------------------------------------------------------------------------------------------------------------------------------------------------------------------------------------------------------------------------------------------------------------------------------------------------------------------------------------------------------------------------------------------------------------------------------------------------------------------------------------------------------------------------------------------------------------------------------------------------------------------------------------------------------------------------------------------------------------------------------------------------------------------------------|----------------------------------------------------------------------------------------------------------------------------------------------------------------------------------------------------------------------------------------------------------------------------------------------------------------------------------------------------------------------------------------------------------------------------------------------------------------------------------------------------------------------------------------------------------------------------------------------------------------------------------------------------------------------------------------------------------------------------------------------------------------------------------------------------------------------------------------------------------------------------------------------------------------------------------------------------------------------------------------------------------------------------------------------------------------------------------------------------------------------------------------------------------------------------------------------------------------------------------------------------------------------------------------------------------------------------------------------------------------------------------------------------------|
|            | H 2.816831 -1.508741 -3.108797<br>O 1.516257 1.467908 1.471061<br>O 1.516255 -1.467908 -1.471061<br>C 2.190206 0.798217 2.550672<br>H 2.816834 1.508740 3.108796<br>C 2.190200 -2.548932 -0.803655<br>H 2.816801 -3.105573 -1.515364<br>O 2.236501 -1.091531 1.089210<br>H 1.388659 0.444477 3.210782<br>H 3.943551 -0.017692 1.553580<br>C 3.020003 -0.362672 2.044661<br>H 3.943531 -1.553508 0.014296<br>H 1.388655 -3.209776 -0.451276<br>C 3.020026 -2.045374 0.358274<br>H 3.303757 -1.019138 2.882051<br>H 3.303857 -2.884153 1.012930 | C -1.370731 1.838355 2.734573<br>C 0.111956 -2.813216 2.161640<br>C -2.064766 2.457625 1.548078<br>C 1.862171 0.135447 2.947221<br>C 0.613364 0.801169 3.464466<br>C -1.485011 -3.253343 0.425326<br>C -3.362673 1.085876 -0.039307<br>C -2.691100 -2.418920 0.774298<br>C -3.650355 -0.285695 0.511477<br>C 1.491754 -2.240869 2.362653<br>H 1.786284 -2.337978 3.416557<br>H -1.321957 2.576159 3.552322<br>H -1.913959 0.941993 3.079054<br>H 0.134945 -3.893357 2.377650<br>H -0.618009 -2.318119 2.821425<br>H -3.089457 2.733921 1.832265<br>H -1.537463 3.362734 1.219999<br>H 2.510808 0.861331 2.439784<br>H 2.424334 -0.322715 3.772066<br>H -0.069625 0.055464 3.905509<br>H 0.867958 1.550491 4.231170<br>H -1.550585 -4.233939 0.918952<br>H -1.431907 -3.410395 -0.656417<br>H -3.289914 1.060377 -1.134145<br>H -4.157021 1.790100 0.243256<br>H -3.606463 -2.940117 0.449233<br>H -2.755933 -2.242275 1.860717<br>H -3.697565 -0.263392 1.613600<br>H -4.612103 -0.660061 0.124704<br>H 2.220898 -2.778259 1.740796 | C -2.884083 0.549151 2.307424<br>H -3.122595 -1.436638 3.084848<br>C -2.037365 2.718378 -0.643447<br>C -2.718010 2.385654 0.674022<br>N -1.708777 1.497872 -1.409629<br>H -1.172226 1.793118 -2.226982<br>H -2.854574 3.310443 1.254747<br>H -1.182343 -2.006620 -2.239923<br>N -1.790320 -1.432611 -1.658411<br>H -2.078007 -3.300045 -0.758918<br>C -3.127816 -1.844799 0.415402<br>C -2.662060 -2.383409 -0.924750<br>H -3.862003 0.498277 1.813725<br>H -2.689760 3.397602 -1.217623<br>H -3.786463 -2.585085 0.898761<br>H -1.824930 -0.306769 -3.424222<br>C -2.501871 -0.517679 -2.583237<br>H -3.727460 2.004379 0.479075<br>C -2.898385 0.791843 -1.926703<br>H -3.728345 -0.939422 0.270495<br>H -3.579041 0.601693 -1.089561<br>H -3.537908 -2.665134 -1.531224<br>H -3.452056 1.413437 -2.649481<br>H -3.396753 -0.999707 -3.008497 | C -2.377146 -2.192592 -1.634568<br>C -2.123676 2.606228 -1.390265<br>C -2.011144 -3.130058 -0.501820<br>C -0.556203 0.449586 -3.571808<br>C -1.654848 -0.519466 -3.202118<br>C -2.591397 2.551300 0.996495<br>C -2.308292 -2.289540 1.808273<br>C -3.345457 1.252384 1.174521<br>C -3.228462 -1.104576 1.641214<br>C -1.036375 2.613645 -2.443169<br>H -1.485621 2.806291 -3.429988<br>H -2.836802 -2.781439 -2.448298<br>H -3.117130 -1.457466 -1.295111<br>H -2.698309 3.546359 -1.466422<br>H -2.817147 1.775606 -1.560705<br>H -2.908838 -3.689796 -0.194546<br>H -1.307915 -3.892678 -0.873744<br>H 0.352559 -0.117858 -3.828540<br>H -0.839876 1.007529 -4.478461<br>H -2.538615 0.024742 -2.846042<br>H -1.964286 -1.087852 -4.095375<br>H -3.309588 3.354066 0.759622<br>H -2.116909 2.847749 1.944256<br>H -1.697534 -2.150544 2.714420<br>H -2.902934 -3.203393 1.969115<br>H -4.158788 1.404333 1.905286<br>H -3.816375 0.960661 0.226885<br>H -3.801936 -1.196908 0.710493<br>H -3.963637 -1.085526 2.463121<br>H -0.358898 3.460909 -2.249363<br>H -0.588443 -2.103124 -2.569011<br>H 0.729612 1.681822 -2.649621<br>H -0.941034 3.261251 0.096115<br>H -0.652123 -3.056526 0.989601<br>H -0.671766 1.747573 2.622674<br>H 1.048759 3.225834 -0.146473<br>H 0.513502 -2.074804 2.597037<br>H 0.545784 -3.086961 -0.946070<br>H 2.189764 0.232621 -2.547955<br>H -2.177409 0.343785 2.546072 |
| 2<br>(S=1) | O -2.256205 1.090762 -1.089243<br>O -1.528285 1.463426 1.465514<br>O -1.528288 -1.463425 -1.465515<br>O -2.256196 -1.090764 1.089246<br>C -3.036950 0.361378 -2.044649<br>C -2.201020 2.546434 0.799823<br>C -2.201104 -0.796273 -2.547580<br>C -2.201093 0.796272 2.547582<br>C -2.201017 -2.546434 -0.799821<br>C -3.036939 -0.361381 2.044655<br>C -3.036922 -2.045132 0.358488<br>C -3.036930 2.045129 -0.358481<br>H -3.320702 1.016867 -2.882980                                                                                        | O -1.550165 0.076371 2.138520<br>O 1.036077 -0.978682 2.417180<br>O -1.086881 2.410266 0.735226<br>O 2.631232 -0.157288 0.258697<br>O 1.586450 2.366983 -0.167093<br>C 2.401297 -0.618351 2.635014<br>C -1.387792 2.494807 2.131794<br>C 3.189961 -0.869068 1.374089<br>C -1.212928 -0.854544 3.179828<br>C 0.235919 -0.712255 3.570400<br>C -0.439475 3.575197 0.209643<br>C 3.418406 0.869601 -0.357967<br>C 1.050068 3.543680 0.439921                                                                                                                                                                                                                                                                                                                                                                                                                                                                                                                                                                                           | N 1.832825 0.088842 2.032797<br>N 1.643322 2.230170 0.007179<br>N 2.114337 -1.910876 -0.005547<br>N 1.833851 0.101432 -2.031657<br>C 2.285510 -1.269961 2.400160<br>C 2.429348 2.354952 1.260068<br>C 2.938714 -1.979157 1.225438<br>C 2.429738 2.362810 -1.244663<br>C 2.939468 -1.971433 -1.236445<br>C 2.946344 1.035192 -1.767837<br>C 2.286888 -1.255040 -2.407146<br>C 2.945566 1.024049 1.775214<br>H 1.399735 -1.828229 2.734463                                                                                                                                                                                                                                                                                                                                                                                                        | N -0.896612 -0.952336 2.645689<br>N -1.780159 1.671302 1.447369<br>N -1.547172 -2.424179 0.142267<br>N -1.383251 2.236505 -1.414887<br>N -2.178812 -0.531385 -1.963197<br>C -2.781874 2.391008 0.639657<br>C -2.476174 -2.358786 1.286202<br>C -2.143262 3.131945 -0.516265<br>C -1.502885 0.162655 3.393146<br>C -2.461008 0.984113 2.559070<br>C -2.236679 -2.830642 -1.098393<br>C -2.133718 1.835213 -2.624102<br>C -3.035588 -1.692240 -1.690486                                                                                                                                                                                                                                                                                                                                                                                                                                                                                                                                                                                                                                                                                                                                                                                                                                                                                                                                                    |

|  |    |           |           |           |    |           |           |           |    |           |           |           |    |           |           |           |
|--|----|-----------|-----------|-----------|----|-----------|-----------|-----------|----|-----------|-----------|-----------|----|-----------|-----------|-----------|
|  | H  | -3.960708 | 0.013696  | -1.555609 | C  | 2.977096  | 2.226121  | 0.124221  | H  | 2.999921  | -1.248295 | 3.240911  | C  | -2.995404 | 0.615276  | -2.392397 |
|  | H  | -1.398610 | 3.204364  | 0.443011  | C  | -2.223364 | 1.295830  | 2.501759  | H  | 1.767715  | 2.800575  | 2.017574  | C  | -1.727905 | -2.173108 | 2.593086  |
|  | H  | -2.820671 | 3.105397  | 1.515483  | H  | -2.434103 | 1.305637  | 3.579992  | H  | 3.275584  | 3.048603  | 1.128428  | H  | -2.450986 | -2.198471 | 3.425155  |
|  | H  | -2.820826 | -1.511169 | -3.107440 | H  | 2.822825  | -1.224877 | 3.453930  | H  | 3.906102  | -1.511753 | 1.004661  | H  | -3.354225 | 3.104715  | 1.257327  |
|  | H  | -1.398740 | -0.438618 | -3.205105 | H  | 2.441533  | 0.447430  | 2.918578  | H  | 3.166603  | -3.017204 | 1.511895  | H  | -3.494180 | 1.643515  | 0.268271  |
|  | H  | -2.820814 | 1.511167  | 3.107445  | H  | -1.962563 | 3.413261  | 2.332931  | H  | 3.275822  | 3.055765  | -1.108465 | H  | -3.080112 | -3.281206 | 1.358399  |
|  | H  | -1.398726 | 0.438620  | 3.205103  | H  | -0.451486 | 2.513165  | 2.712298  | H  | 1.768277  | 2.812989  | -1.999622 | H  | -3.165018 | -1.524592 | 1.115566  |
|  | H  | -1.398604 | -3.204362 | -0.443013 | H  | 4.234357  | -0.565822 | 1.530754  | H  | 3.167671  | -3.007661 | -1.529171 | H  | -2.920145 | 3.684692  | -1.067885 |
|  | H  | -2.820669 | -3.105399 | -1.515477 | H  | 3.171885  | -1.936672 | 1.117367  | H  | 3.906659  | -1.505283 | -1.012187 | H  | -1.463747 | 3.902360  | -0.117538 |
|  | H  | -3.320686 | -1.016870 | 2.882988  | H  | -1.408679 | -1.853625 | 2.768324  | H  | 3.549779  | 1.210071  | -2.674044 | H  | -0.689893 | 0.814540  | 3.752578  |
|  | H  | -3.960699 | -0.013701 | 1.555618  | H  | -1.864556 | -0.700802 | 4.050701  | H  | 3.614782  | 0.576164  | -1.030773 | H  | -2.029244 | -0.197079 | 4.293545  |
|  | H  | -3.960655 | -1.555596 | 0.011438  | H  | 0.445195  | 0.311646  | 3.925386  | H  | 3.001781  | -1.228112 | -3.247334 | H  | -3.239661 | 0.342350  | 2.127178  |
|  | H  | -3.320719 | -2.884381 | 1.012781  | H  | 0.486365  | -1.423986 | 4.373991  | H  | 1.401369  | -1.811330 | -2.745398 | H  | -2.976274 | 1.708682  | 3.212884  |
|  | H  | -3.320731 | 2.884378  | -1.012774 | H  | -0.872133 | 4.480363  | 0.660814  | H  | 3.548651  | 1.193239  | 2.682732  | H  | -2.902355 | -3.692153 | -0.923445 |
|  | H  | -3.960661 | 1.555592  | -0.011428 | H  | -0.655172 | 3.583163  | -0.863531 | H  | 3.614245  | 0.569498  | 1.035598  | H  | -1.475244 | -3.165180 | -1.819021 |
|  | Th | 0.000000  | 0.000004  | -0.000006 | H  | 3.254831  | 0.769472  | -1.439122 | Th | 0.000023  | 0.000145  | -0.000184 | H  | -1.389352 | 1.604159  | -3.399021 |
|  | H  | 3.320825  | -1.010096 | -2.885257 | H  | 4.485778  | 0.713087  | -0.149900 | H  | 1.319875  | 0.458125  | 2.835225  | H  | -2.759504 | 2.664042  | -2.993766 |
|  | H  | 3.320596  | -2.882096 | -1.019547 | H  | 1.511184  | 4.440495  | -0.005911 | H  | 1.509034  | -2.731458 | -0.008275 | H  | -3.554326 | -2.041146 | -2.599152 |
|  | C  | 3.036992  | -0.356582 | -2.045412 | H  | 1.290357  | 3.529495  | 1.516233  | H  | 1.321201  | 0.475580  | -2.832019 | H  | -3.819441 | -1.373730 | -0.989490 |
|  | H  | 1.398815  | 0.446090  | -3.204068 | H  | 3.128258  | 2.323499  | 1.213051  | H  | 0.997341  | 3.017321  | 0.009567  | H  | -3.745987 | 0.802876  | -1.612665 |
|  | C  | 3.036880  | -2.044363 | -0.363279 | H  | 3.551985  | 3.018784  | -0.382155 | H  | -1.401828 | 1.811435  | 2.745800  | H  | -3.554158 | 0.386102  | -3.315835 |
|  | O  | 2.256202  | -1.088227 | -1.091774 | H  | -3.176923 | 1.314439  | 1.955845  | H  | -1.509083 | 2.730689  | 0.008060  | H  | -1.067391 | -3.042060 | 2.747465  |
|  | H  | 1.398526  | -3.205391 | 0.435538  | Th | -0.032182 | -0.023406 | -0.027633 | H  | -1.322361 | -0.475548 | 2.833405  | Th | -0.082527 | 0.034953  | -0.165245 |
|  | C  | 2.201152  | 0.802222  | -2.545685 | O  | -0.744083 | 1.474027  | -2.061901 | C  | -2.287185 | 1.255042  | 2.407277  | N  | 1.138924  | -1.880968 | -1.951975 |
|  | H  | 3.960705  | -0.010015 | -1.555496 | O  | 1.241827  | -0.481326 | -2.436697 | N  | -2.114702 | 1.910369  | 0.005452  | N  | 2.286209  | 0.791190  | -1.653139 |
|  | C  | 2.200965  | -2.548325 | 0.793872  | O  | -2.674174 | 0.148203  | -0.615002 | N  | -1.834006 | -0.101539 | 2.032326  | N  | 1.557627  | -2.229262 | 0.971364  |
|  | H  | 3.960657  | -1.555706 | -0.015113 | O  | 1.127361  | -2.371051 | -0.356580 | H  | -1.399997 | 1.828231  | -2.734691 | N  | 1.188116  | 2.716075  | 0.208092  |
|  | H  | 2.820887  | 1.518424  | -3.103858 | O  | -1.586457 | -2.344545 | 0.202040  | H  | -3.167858 | 3.007537  | 1.528876  | N  | 1.986406  | 0.508465  | 1.938746  |
|  | H  | 2.820602  | -3.108977 | 1.508220  | C  | 1.430552  | -1.874755 | -2.716530 | C  | -2.939711 | 1.971226  | 1.236378  | C  | 3.082961  | 1.948058  | -1.265008 |
|  | O  | 1.528295  | 1.466848  | -1.462091 | C  | -2.949789 | 0.459414  | -1.986640 | H  | -3.002354 | 1.228235  | 3.247240  | C  | 2.351705  | -2.933672 | -0.051952 |
|  | O  | 1.528274  | -1.466850 | 1.462092  | C  | 1.977601  | -2.574888 | -1.497258 | C  | -2.285504 | 1.269677  | -2.400142 | C  | 2.183925  | 3.091977  | -0.822766 |
|  | C  | 2.200987  | 2.548319  | -0.793866 | C  | 0.217770  | 1.561444  | -3.127079 | C  | -2.939025 | 1.978743  | -1.225502 | C  | 2.171199  | -1.325685 | -2.862568 |
|  | H  | 2.820633  | 3.108967  | -1.508210 | C  | 0.653084  | 0.184843  | -3.560454 | N  | -1.832331 | -0.088959 | -2.032733 | C  | 3.080326  | -0.295782 | -2.216721 |
|  | C  | 2.201129  | -0.802228 | 2.545691  | C  | -3.485992 | -0.906032 | -0.079729 | H  | -1.319835 | -0.458103 | -2.835519 | C  | 2.383757  | -1.912923 | 2.152438  |
|  | H  | 2.820855  | -1.518434 | 3.103869  | C  | 0.493250  | -3.505666 | 0.250889  | H  | -3.167068 | 3.016789  | -1.511870 | C  | 1.660643  | 2.928587  | 1.588349  |
|  | O  | 2.256201  | 1.088220  | 1.091781  | C  | -2.901252 | -2.266368 | -0.363278 | H  | -0.996344 | -3.016544 | -0.008838 | C  | 3.011111  | -0.540555 | 2.050476  |
|  | H  | 1.398549  | 3.205390  | -0.435537 | C  | -0.952759 | -3.574262 | -0.164688 | N  | -1.643194 | -2.230092 | -0.006648 | C  | 2.602282  | 1.840210  | 2.054887  |
|  | H  | 3.960668  | 1.555689  | 0.015132  | C  | -2.138500 | 1.674744  | -2.363842 | H  | -1.768836 | -2.813071 | 2.000196  | C  | 1.551769  | -3.149203 | -1.319444 |
|  | C  | 3.036891  | 2.044352  | 0.363291  | H  | -2.266567 | 1.888227  | -3.433907 | C  | -2.946548 | -1.035071 | 1.767826  | H  | 2.140086  | -3.769198 | -2.015391 |
|  | H  | 3.960694  | 0.009996  | 1.555514  | H  | 2.141919  | -1.989822 | -3.550873 | C  | -2.429961 | -2.362822 | 1.244976  | H  | 3.715579  | 2.309177  | -2.095283 |
|  | H  | 1.398789  | -0.446091 | 3.204069  | H  | 0.454500  | -2.300894 | -3.003369 | H  | -3.906949 | 1.505078  | 1.012317  | H  | 3.774528  | 1.643945  | -0.467731 |
|  | C  | 3.036980  | 0.356570  | 2.045424  | H  | -4.020522 | 0.692941  | -2.104071 | H  | -3.000040 | 1.247671  | -3.240783 | H  | 2.708680  | -3.907449 | 0.323023  |
|  | H  | 3.320607  | 2.882083  | 1.019562  | H  | -2.684350 | -0.402135 | -2.619217 | H  | -3.550499 | -1.209877 | 2.673703  | H  | 3.245959  | -2.336003 | -0.263997 |
|  | H  | 3.320812  | 1.010081  | 2.885271  | H  | 2.070818  | -3.648600 | -1.711315 | H  | -1.766972 | -2.800634 | -2.017135 | H  | 2.803782  | 3.939004  | -0.484717 |
|  |    |           |           |           | H  | 2.969546  | -2.183360 | -1.236220 | C  | -2.428825 | -2.355106 | -1.259759 | H  | 1.627280  | 3.447825  | -1.703411 |
|  |    |           |           |           | H  | 1.065918  | 2.131480  | -2.724410 | H  | -3.906344 | 1.511115  | -1.004889 | H  | 1.639659  | -0.837970 | -3.691602 |
|  |    |           |           |           | H  | -0.204922 | 2.115208  | -3.976176 | C  | -2.945011 | -1.024186 | -1.774880 | H  | 2.781395  | -2.134237 | -3.296609 |
|  |    |           |           |           | H  | -0.213533 | -0.404059 | -3.905266 | H  | -3.614537 | -0.575932 | 1.030393  | H  | 3.696781  | -0.735409 | -1.418428 |
|  |    |           |           |           | H  | 1.390304  | 0.257192  | -4.376576 | H  | -3.613692 | -0.569616 | -1.035240 | H  | 3.784954  | 0.068459  | -2.985282 |
|  |    |           |           |           | H  | -4.502466 | -0.842436 | -0.494911 | H  | -3.276057 | -3.055670 | 1.108410  | H  | 3.173921  | -2.666472 | 2.302116  |
|  |    |           |           |           | H  | -3.539447 | -0.729124 | 0.999462  | H  | -3.548163 | -1.193495 | -2.682331 | H  | 1.754621  | -1.962296 | 3.053795  |
|  |    |           |           |           | H  | 0.583949  | -3.359662 | 1.335648  | H  | -3.274990 | -3.048846 | -1.128242 | H  | 0.779199  | 2.953079  | 2.247999  |
|  |    |           |           |           | H  | 1.016970  | -4.431849 | -0.023050 |    |           |           |           | H  | 2.158148  | 3.907128  | 1.696520  |

|              |                                                                                                                                                                                                                                                                                                                                                                                                                                                                                                                                                                                                                                                                                                                                                                                                                                                                                                                                                                                                                                                                                                                                                                                                                                                                                                                                       |                                                                                                                                                                                                                                                                                                                                                                                                                                                                                                                                                                                                                                                                                                                                                                                                                                                                                                                                                                                                                                                                                                                                                                                                                                                                                                              |                                                                                                                                                                                                                                                                                                                                                                                                                                                                                                                                                                                                                                                                                                                                                                                                                                                                                                                                                                                                                                                                                                                                                                                                                                                                                                                                          |                                                                                                                                                                                                                                                                                                                                                                                                                                                                                                                                                                                                                                                                                                                                                                                                                                                                                                                                                                                                                                                                                                                                                                                                                                                                                                      |
|--------------|---------------------------------------------------------------------------------------------------------------------------------------------------------------------------------------------------------------------------------------------------------------------------------------------------------------------------------------------------------------------------------------------------------------------------------------------------------------------------------------------------------------------------------------------------------------------------------------------------------------------------------------------------------------------------------------------------------------------------------------------------------------------------------------------------------------------------------------------------------------------------------------------------------------------------------------------------------------------------------------------------------------------------------------------------------------------------------------------------------------------------------------------------------------------------------------------------------------------------------------------------------------------------------------------------------------------------------------|--------------------------------------------------------------------------------------------------------------------------------------------------------------------------------------------------------------------------------------------------------------------------------------------------------------------------------------------------------------------------------------------------------------------------------------------------------------------------------------------------------------------------------------------------------------------------------------------------------------------------------------------------------------------------------------------------------------------------------------------------------------------------------------------------------------------------------------------------------------------------------------------------------------------------------------------------------------------------------------------------------------------------------------------------------------------------------------------------------------------------------------------------------------------------------------------------------------------------------------------------------------------------------------------------------------|------------------------------------------------------------------------------------------------------------------------------------------------------------------------------------------------------------------------------------------------------------------------------------------------------------------------------------------------------------------------------------------------------------------------------------------------------------------------------------------------------------------------------------------------------------------------------------------------------------------------------------------------------------------------------------------------------------------------------------------------------------------------------------------------------------------------------------------------------------------------------------------------------------------------------------------------------------------------------------------------------------------------------------------------------------------------------------------------------------------------------------------------------------------------------------------------------------------------------------------------------------------------------------------------------------------------------------------|------------------------------------------------------------------------------------------------------------------------------------------------------------------------------------------------------------------------------------------------------------------------------------------------------------------------------------------------------------------------------------------------------------------------------------------------------------------------------------------------------------------------------------------------------------------------------------------------------------------------------------------------------------------------------------------------------------------------------------------------------------------------------------------------------------------------------------------------------------------------------------------------------------------------------------------------------------------------------------------------------------------------------------------------------------------------------------------------------------------------------------------------------------------------------------------------------------------------------------------------------------------------------------------------------|
|              |                                                                                                                                                                                                                                                                                                                                                                                                                                                                                                                                                                                                                                                                                                                                                                                                                                                                                                                                                                                                                                                                                                                                                                                                                                                                                                                                       | H -3.542203 -3.043849 0.083503<br>H -2.825750 -2.448841 -1.447639<br>H -1.036977 -3.703675 -1.257069<br>H -1.456241 -4.417967 0.334567<br>H -2.471899 2.548996 -1.787441                                                                                                                                                                                                                                                                                                                                                                                                                                                                                                                                                                                                                                                                                                                                                                                                                                                                                                                                                                                                                                                                                                                                     |                                                                                                                                                                                                                                                                                                                                                                                                                                                                                                                                                                                                                                                                                                                                                                                                                                                                                                                                                                                                                                                                                                                                                                                                                                                                                                                                          | H 3.665285 -0.380339 2.924838<br>H 3.652441 -0.477290 1.159211<br>H 3.517271 1.845889 1.452643<br>H 2.920223 2.051015 3.089498<br>H 0.646570 -3.729728 -1.085147<br>H 1.590166 1.070876 -2.359929<br>H 0.343084 -2.097643 -2.550415<br>H 0.845046 -2.886971 1.285238<br>H 0.408992 3.359151 0.089623<br>H -0.056194 -1.208159 3.157096<br>H -0.898563 -3.184338 0.353215<br>H -1.190897 2.389331 1.879972<br>H -0.575370 2.749139 -1.765126<br>H -1.564331 -0.751535 -2.754830<br>H 1.360336 0.406324 2.739065                                                                                                                                                                                                                                                                                                                                                                                                                                                                                                                                                                                                                                                                                                                                                                                       |
| 1<br>(S=1/2) | O -2.433437 1.079302 -1.066243<br>O -1.673498 1.442515 1.460364<br>O -1.673501 -1.442505 -1.460372<br>O -2.433372 -1.079340 1.066282<br>C -3.197863 0.367681 -2.030815<br>C -2.344930 2.522985 0.808434<br>C -2.345249 -0.777682 -2.532725<br>C -2.345207 0.777679 2.532732<br>C -2.344896 -2.522989 -0.808428<br>C -3.197804 -0.367706 2.030843<br>C -3.197693 -2.035194 0.342868<br>C -3.197749 2.035170 -0.342838<br>H -3.470578 1.032263 -2.869140<br>H -4.131626 0.011707 -1.562214<br>H -1.536583 3.164040 0.430868<br>H -2.949417 3.087969 1.534401<br>H -2.950027 -1.496799 -3.106097<br>H -1.537105 -0.392572 -3.169540<br>H -2.949995 1.496782 3.106111<br>H -1.537042 0.392594 3.169534<br>H -1.536528 -3.164033 -0.430890<br>H -2.949396 -3.087979 -1.534381<br>H -3.470512 -1.032274 2.869181<br>H -4.131570 -0.011750 1.562236<br>H -4.131443 -1.562323 -0.007438<br>H -3.470406 -2.881594 0.997134<br>H -3.470468 2.881557 -0.997118<br>H -4.131495 1.562306 0.007488<br>Th -0.000000 0.000018 -0.000020<br>H 3.470418 -0.996520 -2.881786<br>H 3.470575 -2.868932 -1.032866<br>C 3.197716 -0.342427 -2.035248<br>H 1.536540 0.431566 -3.163913<br>C 3.197844 -2.030750 -0.368111<br>O 2.433407 -1.066040 -1.079534<br>H 1.537092 -3.169652 0.391890<br>C 2.344917 0.808970 -2.522801<br>H 4.131472 0.007777 -1.562313 | O 1.584463 0.914115 1.879626<br>O -1.193617 0.990376 2.248120<br>O 1.973274 -1.643649 0.918300<br>O -2.481234 -0.757354 0.486567<br>O -0.550015 -2.732871 0.341814<br>C -2.299706 0.205671 2.715105<br>C 2.325434 -1.357390 2.281857<br>C -3.206111 -0.130758 1.562328<br>C 0.961436 1.844293 2.784551<br>C -0.311340 1.268472 3.341445<br>C 1.792197 -3.044631 0.677666<br>C -2.829415 -2.105072 0.142240<br>C 0.413997 -3.505923 1.066173<br>C -1.868761 -3.071988 0.775858<br>C 2.665880 0.103120 2.384747<br>H 2.860998 0.352522 3.437808<br>H -2.868605 0.781956 3.466796<br>H -1.898120 -0.712495 3.186143<br>H 3.205469 -1.957798 2.568069<br>H 1.478079 -1.609037 2.947799<br>H -3.996005 -0.806165 1.922987<br>H -3.675487 0.771451 1.147849<br>H 0.765994 2.749159 2.194857<br>H 1.655143 2.092314 3.599869<br>H -0.112274 0.326789 3.887607<br>H -0.790460 1.988637 4.027848<br>H 2.547943 -3.616086 1.238650<br>H 1.963546 -3.195293 -0.392910<br>H -2.781322 -2.157159 -0.953181<br>H -3.857880 -2.324012 0.462706<br>H 0.295055 -4.574675 0.812544<br>H 0.229503 -3.370517 2.147988<br>H -1.907843 -3.005066 1.879413<br>H -2.106352 -4.105889 0.470126<br>H 3.555861 0.344593 1.786471<br>Th 0.010930 0.011882 -0.015200<br>O 1.120061 -1.477167 -1.860152<br>O -1.482188 -0.463983 -2.284675 | N -2.097418 -1.442856 1.300071<br>N -1.846722 -1.469222 -1.581328<br>N -2.011356 1.431843 1.308278<br>N -1.710208 1.404309 -1.439048<br>C -2.632052 -0.681405 2.440726<br>C -2.557767 -2.533147 -0.854747<br>C -3.081564 0.704562 2.019756<br>C -2.695530 -0.604441 -2.424053<br>C -2.515453 2.602680 0.562819<br>C -2.975198 0.744988 -1.785345<br>C -1.869270 2.722519 -0.817533<br>C -3.147748 -2.015907 0.443514<br>H -1.818968 -0.590702 3.174598<br>H -3.476250 -1.207918 2.920619<br>H -1.824749 -3.322505 -0.632634<br>H -3.354630 -2.982627 -1.471319<br>H -3.945464 0.637471 1.343986<br>H -3.427905 1.256038 2.910344<br>H -3.646689 -1.104361 -2.669417<br>H -2.157067 -0.436580 -3.369027<br>H -2.366207 3.540124 1.119445<br>H -3.601746 2.494788 0.446977<br>H -3.577543 1.362427 -2.474946<br>H -3.564786 0.619689 -0.868371<br>H -2.472634 3.406489 -1.439488<br>H -0.866789 3.166819 -0.733991<br>H -3.694145 -2.824403 0.957621<br>H -3.885361 -1.231021 0.228768<br>Th -0.000024 -0.155558 -0.000149<br>H -1.540938 -2.212911 1.678149<br>H -1.340665 1.731727 2.022543<br>H -1.155579 1.489619 -2.300523<br>H -1.153408 -1.900259 -2.198066<br>H 1.819486 -0.587794 -3.174943<br>H 1.341070 1.734185 -2.021582<br>H 1.540832 -2.210768 -1.679609<br>C 2.632507 -0.678979 -2.441056<br>N 2.011330 1.433489 -1.307313 | N 0.089258 2.569826 -1.185248<br>N 1.160932 2.027050 1.480944<br>N 1.567017 0.330847 -2.294275<br>N 1.420377 -0.736716 2.353773<br>N 2.514764 -1.465886 -0.215844<br>C 2.405781 1.555538 2.117884<br>C 2.123350 1.695183 -2.347628<br>C 2.123091 0.378434 3.019884<br>C 0.268560 3.615735 -0.161191<br>C 1.419649 3.284411 0.757714<br>C 2.634221 -0.653708 -2.527360<br>C 2.291399 -1.907646 2.174357<br>C 3.408334 -0.953922 -1.266872<br>C 3.256149 -1.692855 1.035456<br>C 1.006233 2.710641 -2.340190<br>H 1.419814 3.730171 -2.389907<br>H 2.857613 2.361061 2.726497<br>H 3.115927 1.306897 1.316967<br>H 2.703033 1.831447 -3.279197<br>H 2.814238 1.840554 -1.507085<br>H 3.057096 0.033746 3.490803<br>H 1.473274 0.726382 3.848226<br>H -0.656755 3.692438 0.431906<br>H 0.426707 4.602347 -0.625517<br>H 2.342351 3.161087 0.175500<br>H 1.596736 4.114522 1.460784<br>H 3.323343 -0.308252 -3.315815<br>H 2.179264 -1.572940 -2.931491<br>H 1.655651 -2.788022 1.976177<br>H 2.843019 -2.136261 3.100089<br>H 4.219243 -1.669960 -1.489599<br>H 3.887410 -0.043260 -0.881978<br>H 3.879948 -0.810214 1.227521<br>H 3.943662 -2.550897 0.946461<br>H 0.414295 2.555935 -3.258434<br>Th -0.000266 0.000329 -0.006598<br>N -0.106680 -2.393900 -1.508310<br>N -1.142375 -2.209065 1.218986 |



|              |   |           |           |           |   |           |           |           |   |          |           |           |   |           |           |           |
|--------------|---|-----------|-----------|-----------|---|-----------|-----------|-----------|---|----------|-----------|-----------|---|-----------|-----------|-----------|
|              | C | 2.345225  | -2.532907 | 0.777139  | O | 2.504528  | 0.700281  | -0.876441 | N | 2.097911 | -1.441355 | -1.301082 | N | -1.588085 | -0.029394 | -2.298701 |
|              | H | 4.131598  | -1.562214 | -0.012030 | O | -1.958263 | 1.685340  | -0.529151 | H | 0.866358 | 3.165729  | 0.736852  | N | -1.397900 | 0.422014  | 2.437818  |
|              | H | 2.949416  | 1.535044  | -3.087637 | O | 0.612276  | 2.747485  | -0.312509 | H | 3.428630 | 1.258836  | -2.908866 | N | -2.517151 | 1.487553  | -0.002752 |
|              | H | 2.949999  | -3.106431 | 1.496137  | C | -2.162560 | 0.707329  | -2.746826 | C | 3.081818 | 0.706684  | -2.018883 | C | -2.381412 | -1.826454 | 1.922963  |
|              | O | 1.673525  | 1.460691  | -1.442177 | C | 2.769177  | 0.268040  | -2.214900 | H | 3.476818 | -1.204973 | -2.921326 | C | -2.158468 | -1.373106 | -2.508232 |
|              | O | 1.673470  | -1.460698 | 1.442184  | C | -2.868800 | 1.382420  | -1.597202 | C | 1.868973 | 2.721646  | 0.820002  | C | -2.091196 | -0.771543 | 2.963570  |
|              | C | 2.345282  | 2.532892  | -0.777123 | C | 0.192631  | -2.091788 | -2.767886 | C | 2.515257 | 2.603525  | -0.560449 | C | -0.262239 | -3.564721 | -0.625421 |
|              | H | 2.950077  | 3.106404  | -1.496113 | C | -0.741198 | -1.062350 | -3.351429 | N | 1.710162 | 1.402716  | 1.439980  | C | -1.403107 | -3.364769 | 0.343068  |
|              | C | 2.344856  | -0.808986 | 2.522817  | C | 2.884287  | 2.057669  | -0.623968 | H | 1.155044 | 1.486836  | 2.301318  | C | -2.648852 | 0.984351  | -2.400483 |
|              | H | 2.949335  | -1.535067 | 3.087666  | C | -1.742863 | 3.053681  | -0.168469 | H | 2.365900 | 3.541597  | -1.115981 | C | -2.272670 | 1.603933  | 2.421877  |
|              | O | 2.433404  | 1.066027  | 1.079552  | C | 1.810947  | 3.034034  | -1.035443 | H | 1.153110 | -1.902283 | 2.196207  | C | -3.417217 | 1.124546  | -1.108558 |
|              | H | 1.537151  | 3.169651  | -0.391892 | C | -0.462835 | 3.561261  | -0.779406 | N | 1.846590 | -1.470746 | 1.579994  | C | -3.248113 | 1.539297  | 1.273672  |
|              | H | 4.131625  | 1.562173  | 0.012082  | C | 2.461305  | -1.205966 | -2.303797 | H | 1.824816 | -3.323146 | 0.629580  | C | -1.050729 | -2.388826 | -2.650093 |
|              | C | 3.197871  | 2.030724  | 0.368145  | H | 2.591322  | -1.546735 | -3.340699 | C | 3.148019 | -2.015510 | -0.445099 | H | -1.474501 | -3.392296 | -2.812264 |
|              | H | 4.131439  | -0.007827 | 1.562354  | H | -2.905962 | 0.423444  | -3.511663 | C | 2.557776 | -2.533987 | 0.852578  | H | -2.824971 | -2.703755 | 2.429986  |
|              | H | 1.536476  | -0.431564 | 3.163913  | H | -1.403456 | 1.382035  | -3.182410 | H | 3.945381 | 0.639013  | -1.342743 | H | -3.100703 | -1.481917 | 1.166969  |
|              | C | 3.197683  | 0.342396  | 2.035276  | H | 3.835179  | 0.427321  | -2.449236 | H | 2.472074 | 3.405077  | 1.442799  | H | -2.758191 | -1.389313 | -3.437010 |
|              | H | 3.470601  | 2.868902  | 1.032905  | H | 2.132677  | 0.838906  | -2.912143 | H | 3.694284 | -2.823619 | -0.959965 | H | -2.833010 | -1.616246 | -1.676957 |
|              | H | 3.470387  | 0.996481  | 2.881820  | H | -3.340875 | 2.305818  | -1.962310 | H | 2.156555 | -0.439542 | 3.368567  | H | -3.020655 | -0.492573 | 3.484208  |
|              |   |           |           |           | H | -3.646498 | 0.730728  | -1.178308 | C | 2.695259 | -0.606680 | 2.423602  | H | -1.432258 | -1.219318 | 3.734934  |
|              |   |           |           |           | H | -0.359287 | -2.832883 | -2.174342 | H | 3.601564 | 2.495656  | -0.444686 | H | 0.672063  | -3.707896 | -0.059431 |
|              |   |           |           |           | H | 0.737875  | -2.611049 | -3.568026 | C | 2.975124 | 0.743302  | 1.786110  | H | -0.419268 | -4.484869 | -1.210760 |
|              |   |           |           |           | H | -0.169079 | -0.270448 | -3.866729 | H | 3.885801 | -1.231024 | -0.229436 | H | -2.334194 | -3.174758 | -0.207040 |
|              |   |           |           |           | H | -1.437338 | -1.538057 | -4.062425 | H | 3.565088 | 0.618874  | 0.869250  | H | -1.565681 | -4.280093 | 0.935026  |
|              |   |           |           |           | H | 3.819705  | 2.285854  | -1.156808 | H | 3.354533 | -2.984011 | 1.468887  | H | -3.342978 | 0.746158  | -3.223498 |
|              |   |           |           |           | H | 3.068168  | 2.124093  | 0.452799  | H | 3.577120 | 1.360202  | 2.476495  | H | -2.189254 | 1.944451  | -2.686515 |
|              |   |           |           |           | H | -1.690704 | 3.069388  | 0.928219  | H | 3.646310 | -1.106885 | 2.668788  | H | -1.639484 | 2.504175  | 2.335843  |
|              |   |           |           |           | H | -2.592604 | 3.671388  | -0.491783 |   |          |           |           | H | -2.815095 | 1.707308  | 3.375040  |
|              |   |           |           |           | H | 2.142774  | 4.061547  | -0.807059 |   |          |           |           | H | -4.223671 | 1.868773  | -1.232924 |
|              |   |           |           |           | H | 1.591923  | 2.952525  | -2.114209 |   |          |           |           | H | -3.901780 | 0.174483  | -0.845017 |
|              |   |           |           |           | H | -0.504189 | 3.490081  | -1.880928 |   |          |           |           | H | -3.866296 | 0.635350  | 1.350116  |
|              |   |           |           |           | H | -0.289121 | 4.610955  | -0.488837 |   |          |           |           | H | -3.939786 | 2.398028  | 1.307827  |
|              |   |           |           |           | H | 3.136059  | -1.778835 | -1.652418 |   |          |           |           | H | -0.478124 | -2.127855 | -3.556532 |
|              |   |           |           |           |   |           |           |           |   |          |           |           | H | -0.505040 | -2.539381 | 1.961041  |
|              |   |           |           |           |   |           |           |           |   |          |           |           | H | 0.817762  | -2.475981 | -1.934452 |
|              |   |           |           |           |   |           |           |           |   |          |           |           | H | -0.977619 | 0.131777  | -3.145106 |
|              |   |           |           |           |   |           |           |           |   |          |           |           | H | -0.677377 | 0.641229  | 3.161117  |
|              |   |           |           |           |   |           |           |           |   |          |           |           | H | -0.844095 | 2.706735  | -1.574791 |
|              |   |           |           |           |   |           |           |           |   |          |           |           | H | 0.948585  | 0.265325  | -3.148075 |
|              |   |           |           |           |   |           |           |           |   |          |           |           | H | 0.531860  | 2.262061  | 2.265768  |
|              |   |           |           |           |   |           |           |           |   |          |           |           | H | 0.707404  | -1.044940 | 3.050903  |
|              |   |           |           |           |   |           |           |           |   |          |           |           | H | 2.211855  | -2.392533 | -0.525329 |
|              |   |           |           |           |   |           |           |           |   |          |           |           | H | -2.215123 | 2.448071  | -0.182438 |
| 1<br>(S=3/2) | O | -2.389433 | 1.548474  | -0.017064 | O | 0.445342  | -1.385384 | 2.116475  | N | 2.129874 | -1.389791 | -1.328842 | N | 0.303049  | 2.547772  | -1.214808 |
|              | O | -1.660942 | 0.022687  | 2.082564  | O | -0.101761 | 1.356800  | 2.351838  | N | 1.896602 | -1.497264 | 1.533626  | N | 1.384610  | 1.950888  | 1.411748  |
|              | O | -1.660943 | -0.022687 | -2.082563 | O | -1.561005 | -2.219713 | 0.426378  | N | 1.924926 | 1.484858  | -1.287896 | N | 1.620729  | 0.206736  | -2.286902 |
|              | O | -2.389434 | -1.548474 | 0.017064  | O | -1.515269 | 2.191696  | 0.093192  | N | 1.657880 | 1.372710  | 1.474103  | N | 1.437639  | -0.783455 | 2.337488  |
|              | C | -3.166081 | 1.682070  | -1.204286 | O | -3.218924 | -0.065652 | -0.671082 | C | 2.621378 | -0.587883 | -2.458336 | N | 2.414454  | -1.650008 | -0.227721 |
|              | C | -2.332993 | 1.253318  | 2.347261  | C | -1.174497 | 2.295380  | 2.496849  | C | 2.636403 | -2.524574 | 0.785290  | C | 2.627292  | 1.385821  | 1.969616  |
|              | C | -2.333062 | 1.201740  | -2.374458 | C | -1.634836 | -2.585968 | 1.806738  | C | 3.021218 | 0.805351  | -2.012871 | C | 2.303445  | 1.510720  | -2.285248 |
|              | C | -2.333061 | -1.201740 | 2.374459  | C | -1.322710 | 3.069797  | 1.212200  | C | 2.714546 | -0.629118 | 2.399128  | C | 2.293520  | 0.267946  | 2.926705  |
|              | C | -2.332995 | -1.253318 | -2.347261 | C | 0.938347  | -0.614241 | 3.224897  | C | 2.397811 | 2.648944  | -0.508166 | C | 0.510967  | 3.589085  | -0.191388 |
|              | C | -3.166081 | -1.682069 | 1.204287  | C | 0.015111  | 0.541122  | 3.522085  | C | 2.947110 | 0.745298  | 1.794903  | C | 1.659180  | 3.221161  | 0.718891  |
|              |   |           |           |           |   |           |           |           |   |          |           |           |   |           |           |           |
|              |   |           |           |           |   |           |           |           |   |          |           |           |   |           |           |           |

|  |    |           |           |           |    |           |           |           |    |           |           |           |    |           |           |           |
|--|----|-----------|-----------|-----------|----|-----------|-----------|-----------|----|-----------|-----------|-----------|----|-----------|-----------|-----------|
|  | C  | -3.166215 | -1.707616 | -1.166909 | C  | -2.810942 | -2.366801 | -0.264265 | C  | 1.768469  | 2.709991  | 0.884476  | C  | 2.581723  | -0.873220 | -2.543789 |
|  | C  | -3.166213 | 1.707616  | 1.166910  | C  | -2.769303 | 2.266197  | -0.607658 | C  | 3.204617  | -1.962226 | -0.504202 | C  | 2.166761  | -2.048343 | 2.171827  |
|  | H  | -3.454027 | 2.736326  | -1.356640 | C  | -3.766584 | -1.214299 | -0.046859 | H  | 1.797081  | -0.516479 | -3.182701 | C  | 3.343316  | -1.249811 | -1.296202 |
|  | H  | -4.090801 | 1.091001  | -1.093891 | C  | -3.729318 | 1.170114  | -0.205135 | H  | 3.480150  | -1.070068 | -2.958322 | C  | 3.135247  | -1.960743 | 1.017364  |
|  | H  | -1.524363 | 1.973068  | 2.537917  | C  | -0.234867 | -2.628122 | 2.366351  | H  | 1.923171  | -3.327394 | 0.547753  | C  | 1.284141  | 2.623515  | -2.324286 |
|  | H  | -2.959414 | 1.162169  | 3.248815  | H  | -0.278698 | -2.823112 | 3.447329  | H  | 3.446886  | -2.964828 | 1.390585  | H  | 1.786975  | 3.602800  | -2.332568 |
|  | H  | -2.959698 | 1.090511  | -3.273613 | H  | -0.945220 | 2.990417  | 3.323153  | H  | 3.884425  | 0.754827  | -1.335214 | H  | 3.197258  | 2.159092  | 2.515150  |
|  | H  | -1.524463 | 1.917035  | -2.581316 | H  | -2.095924 | 1.729100  | 2.724663  | H  | 3.349872  | 1.386895  | -2.890784 | H  | 3.251803  | 1.048332  | 1.128035  |
|  | H  | -2.959696 | -1.090510 | 3.273614  | H  | -2.091025 | -3.586689 | 1.900815  | H  | 3.682883  | -1.101164 | 2.631600  | H  | 2.955688  | 1.604969  | -3.171389 |
|  | H  | -1.524463 | -1.917035 | 2.581316  | H  | -2.241781 | -1.839312 | 2.350807  | H  | 2.172081  | -0.504464 | 3.348974  | H  | 2.948298  | 1.583327  | -1.397321 |
|  | H  | -1.524366 | -1.973068 | -2.537917 | H  | -2.172611 | 3.761263  | 1.302663  | H  | 2.210817  | 3.597352  | -1.033880 | H  | 3.215147  | -0.160607 | 3.349040  |
|  | H  | -2.959416 | -1.162168 | -3.248814 | H  | -0.414517 | 3.655739  | 1.012820  | H  | 3.488392  | 2.575158  | -0.408704 | H  | 1.730464  | 0.699355  | 3.779225  |
|  | H  | -3.454027 | -2.736325 | 1.356641  | H  | 1.934498  | -0.263343 | 2.924159  | H  | 3.533769  | 1.365880  | 2.495070  | H  | -0.407635 | 3.687708  | 0.407828  |
|  | H  | -4.090800 | -1.091000 | 1.093893  | H  | 1.033218  | -1.254921 | 4.114132  | H  | 3.532810  | 0.661971  | 0.870667  | H  | 0.694766  | 4.571627  | -0.655052 |
|  | H  | -4.090693 | -1.113904 | -1.069434 | H  | -0.991419 | 0.170879  | 3.789976  | H  | 2.361904  | 3.396180  | 1.513699  | H  | 2.578814  | 3.100109  | 0.130675  |
|  | H  | -3.454600 | -2.764822 | -1.296254 | H  | 0.419367  | 1.144820  | 4.353433  | H  | 0.752964  | 3.128081  | 0.829308  | H  | 1.850982  | 4.032504  | 1.439095  |
|  | H  | -3.454598 | 2.764822  | 1.296255  | H  | -3.281517 | -3.311639 | 0.050435  | H  | 3.760378  | -2.745666 | -1.046359 | H  | 3.286848  | -0.592696 | -3.343812 |
|  | H  | -4.090692 | 1.113905  | 1.069435  | H  | -2.553965 | -2.441289 | -1.327249 | H  | 3.929379  | -1.168016 | -0.277404 | H  | 2.027443  | -1.740406 | -2.942088 |
|  | Th | -0.002652 | -0.000001 | -0.000001 | H  | -2.520524 | 2.185049  | -1.674290 | Th | 0.000051  | -0.213165 | -0.000213 | H  | 1.434948  | -2.854766 | 1.995145  |
|  | H  | 3.449879  | 1.282398  | -2.753308 | H  | -3.226644 | 3.251098  | -0.430037 | H  | 1.570552  | -2.158142 | -1.711555 | H  | 2.703348  | -2.321014 | 3.094993  |
|  | H  | 3.449820  | -1.339811 | -2.726074 | H  | -4.744780 | -1.469205 | -0.493920 | H  | 1.258753  | 1.794075  | -2.000468 | H  | 4.066748  | -2.051560 | -1.525292 |
|  | C  | 3.171579  | 1.166796  | -1.691544 | H  | -3.911551 | -1.021282 | 1.030219  | H  | 1.112843  | 1.417267  | 2.344175  | H  | 3.927819  | -0.395085 | -0.926792 |
|  | H  | 1.530134  | 2.528499  | -1.979182 | H  | -3.833010 | 1.137624  | 0.895030  | H  | 1.199929  | -1.957389 | 2.128221  | H  | 3.863290  | -1.158304 | 1.196099  |
|  | C  | 3.171639  | -1.202100 | -1.666923 | H  | -4.719882 | 1.373881  | -0.650648 | H  | -1.796296 | -0.521230 | 3.181669  | H  | 3.714742  | -2.894810 | 0.927490  |
|  | O  | 2.401639  | -0.015912 | -1.509078 | H  | 0.356340  | -3.417758 | 1.881235  | H  | -1.259132 | 1.789760  | 2.002965  | H  | 0.727027  | 2.532268  | -3.271635 |
|  | H  | 1.530597  | -2.570193 | -1.925941 | Th | -0.000035 | 0.030524  | -0.000006 | H  | -1.570652 | -2.161689 | 1.708449  | Th | -0.005605 | 0.003780  | -0.005931 |
|  | C  | 2.333455  | 2.349984  | -1.252242 | O  | -0.445381 | -1.383871 | -2.117382 | C  | -2.620966 | -0.592280 | 2.457682  | N  | -0.346832 | -2.399575 | -1.489261 |
|  | H  | 4.102112  | 1.082675  | -1.105009 | O  | 0.102151  | 1.358155  | -2.350850 | N  | -1.925536 | 1.481996  | 1.289901  | N  | -1.329932 | -2.109111 | 1.240071  |
|  | C  | 2.333687  | -2.375928 | -1.202804 | O  | 1.560597  | -2.219566 | -0.427695 | N  | -2.129543 | -1.392499 | 1.326919  | N  | -1.664407 | 0.053020  | -2.272121 |
|  | H  | 4.102246  | -1.105688 | -1.082398 | O  | 1.515701  | 2.191576  | -0.092127 | H  | -0.753535 | 3.130067  | -0.823381 | N  | -1.367211 | 0.534491  | 2.439596  |
|  | H  | 2.956860  | 3.253990  | -1.168098 | O  | 3.218503  | -0.066633 | 0.671217  | H  | -3.350398 | 1.381606  | 2.892698  | N  | -2.430922 | 1.652657  | -0.001749 |
|  | H  | 2.957297  | -3.277785 | -1.099366 | C  | 1.174916  | 2.296746  | -2.495693 | C  | -3.021620 | 0.801284  | 2.014032  | C  | -2.535611 | -1.619999 | 1.933685  |
|  | O  | 1.652039  | 2.096729  | -0.021822 | C  | 1.634538  | -2.584954 | -1.808321 | H  | -3.479187 | -1.075577 | 2.957525  | C  | -2.359717 | -1.238616 | -2.394734 |
|  | O  | 1.652042  | -2.096728 | 0.021822  | C  | 1.323762  | 3.070382  | -1.210659 | C  | -1.768843 | 2.711681  | -0.879804 | C  | -2.151372 | -0.596692 | 2.974305  |
|  | C  | 2.333683  | 2.375929  | 1.202804  | C  | -0.938516 | -0.612043 | -3.225298 | C  | -2.398530 | 2.647607  | 0.512567  | C  | -0.538182 | -3.547561 | -0.584354 |
|  | H  | 2.957292  | 3.277787  | 1.099366  | C  | -0.015255 | 0.543469  | -3.521790 | N  | -1.657622 | 1.375589  | -1.472166 | C  | -1.652214 | -3.274731 | 0.399778  |
|  | C  | 2.333456  | -2.349983 | 1.252242  | C  | 2.810470  | -2.367462 | 0.262914  | H  | -1.113021 | 1.422403  | -2.342295 | C  | -2.622099 | 1.159396  | -2.394246 |
|  | H  | 2.956863  | -3.253988 | 1.168099  | C  | 2.769548  | 2.265443  | 0.609134  | H  | -2.211721 | 3.594947  | 1.040272  | C  | -2.146673 | 1.779965  | 2.420217  |
|  | O  | 2.401636  | 0.015913  | 1.509080  | C  | 3.766298  | -1.214957 | 0.046469  | H  | -1.199091 | -1.953248 | -2.130136 | C  | -3.370250 | 1.388445  | -1.102886 |
|  | H  | 1.530591  | 2.570194  | 1.925940  | C  | 3.729439  | 1.169344  | 0.206438  | N  | -1.896722 | -1.494438 | -1.535534 | C  | -3.137664 | 1.784218  | 1.282729  |
|  | H  | 4.102242  | 1.105691  | 1.082400  | C  | 0.234691  | -2.626509 | -2.368243 | H  | -1.923917 | -3.326758 | -0.553820 | C  | -1.353090 | -2.347871 | -2.577158 |
|  | C  | 3.171635  | 1.202103  | 1.666924  | H  | 0.278874  | -2.820398 | -3.449409 | C  | -3.204563 | -1.963223 | 0.501377  | H  | -1.865757 | -3.316741 | -2.679473 |
|  | H  | 4.102111  | -1.082671 | 1.105012  | H  | 0.945334  | 2.992359  | -3.321445 | C  | -2.636840 | -2.523091 | -0.789413 | H  | -3.065321 | -2.451969 | 2.431650  |
|  | H  | 1.530135  | -2.528499 | 1.979181  | H  | 2.096195  | 1.730531  | -2.724325 | H  | -3.884850 | 0.751290  | 1.336365  | H  | -3.214002 | -1.207341 | 1.171679  |
|  | C  | 3.171578  | -1.166794 | 1.691545  | H  | 2.090578  | -3.585693 | -1.902954 | H  | -2.362326 | 3.398921  | -1.507836 | H  | -3.033073 | -1.232041 | -3.270163 |
|  | H  | 3.449815  | 1.339814  | 2.726076  | H  | 2.241691  | -1.838028 | -2.351831 | H  | -3.760324 | -2.747595 | 1.042184  | H  | -2.983438 | -1.400704 | -1.503571 |
|  | H  | 3.449877  | -1.282395 | 2.753309  | H  | 2.174251  | 3.761174  | -1.300883 | H  | -2.170759 | -0.498971 | -3.349562 | H  | -3.048040 | -0.242221 | 3.505416  |
|  |    |           |           |           | H  | 0.416162  | 3.657201  | -1.011040 | C  | -2.713990 | -0.624994 | -2.400311 | H  | -1.519450 | -1.092626 | 3.740310  |
|  |    |           |           |           | H  | -1.934698 | -0.261418 | -2.924361 | H  | -3.489086 | 2.573862  | 0.412793  | H  | 0.397846  | -3.725693 | -0.031847 |
|  |    |           |           |           | H  | -1.033326 | -1.252154 | -4.114950 | C  | -2.946761 | 0.748513  | -1.794177 | H  | -0.751375 | -4.468923 | -1.149800 |
|  |    |           |           |           | H  | 0.991151  | 0.173296  | -3.790291 | H  | -3.929211 | -1.168432 | 0.276307  | H  | -2.583511 | -3.058231 | -0.140821 |
|  |    |           |           |           | H  | -0.419670 | 1.147991  | -4.352470 | H  | -3.532611 | 0.663864  | -0.870173 | H  | -1.846105 | -4.168103 | 1.014856  |
|  |    |           |           |           | H  | 3.280891  | -3.312103 | -0.052600 | H  | -3.447584 | -2.961646 | -1.395569 | H  | -3.336690 | 0.975158  | -3.213624 |

|            |                                                                                                                                                                                                                                                                                                                                                                                                                                                                                                                                                                                                                                                                                                                                                                                                                                                                                                                                                                                                                                                                                                                                                                                                    |                                                                                                                                                                                                                                                                                                                                                                                                                                                                                                                                                                                                                                                                                                                                                                                                                                                                                                                                                                                                                                                                                                                                                                                                         |                                                                                                                                                                                                                                                                                                                                                                                                                                                                                                                                                                                                                                                                                                                                                                                                                                                                                                                                                                                                                                                                                                                                                                                                                                 |                                                                                                                                                                                                                                                                                                                                                                                                                                                                                                                                                                                                                                                                                                                                                                                                                                                                                                                                                                                                                                                                                                                                                                                                                                    |
|------------|----------------------------------------------------------------------------------------------------------------------------------------------------------------------------------------------------------------------------------------------------------------------------------------------------------------------------------------------------------------------------------------------------------------------------------------------------------------------------------------------------------------------------------------------------------------------------------------------------------------------------------------------------------------------------------------------------------------------------------------------------------------------------------------------------------------------------------------------------------------------------------------------------------------------------------------------------------------------------------------------------------------------------------------------------------------------------------------------------------------------------------------------------------------------------------------------------|---------------------------------------------------------------------------------------------------------------------------------------------------------------------------------------------------------------------------------------------------------------------------------------------------------------------------------------------------------------------------------------------------------------------------------------------------------------------------------------------------------------------------------------------------------------------------------------------------------------------------------------------------------------------------------------------------------------------------------------------------------------------------------------------------------------------------------------------------------------------------------------------------------------------------------------------------------------------------------------------------------------------------------------------------------------------------------------------------------------------------------------------------------------------------------------------------------|---------------------------------------------------------------------------------------------------------------------------------------------------------------------------------------------------------------------------------------------------------------------------------------------------------------------------------------------------------------------------------------------------------------------------------------------------------------------------------------------------------------------------------------------------------------------------------------------------------------------------------------------------------------------------------------------------------------------------------------------------------------------------------------------------------------------------------------------------------------------------------------------------------------------------------------------------------------------------------------------------------------------------------------------------------------------------------------------------------------------------------------------------------------------------------------------------------------------------------|------------------------------------------------------------------------------------------------------------------------------------------------------------------------------------------------------------------------------------------------------------------------------------------------------------------------------------------------------------------------------------------------------------------------------------------------------------------------------------------------------------------------------------------------------------------------------------------------------------------------------------------------------------------------------------------------------------------------------------------------------------------------------------------------------------------------------------------------------------------------------------------------------------------------------------------------------------------------------------------------------------------------------------------------------------------------------------------------------------------------------------------------------------------------------------------------------------------------------------|
|            |                                                                                                                                                                                                                                                                                                                                                                                                                                                                                                                                                                                                                                                                                                                                                                                                                                                                                                                                                                                                                                                                                                                                                                                                    | H 2.553465 -2.442814 1.325829<br>H 2.520470 2.184114 1.675684<br>H 3.227303 3.250229 0.431893<br>H 4.744297 -1.470232 0.493762<br>H 3.911665 -1.021290 -1.030438<br>H 3.833833 1.137615 -0.893687<br>H 4.719755 1.372616 0.652751<br>H -0.356773 -3.416547 -1.884101                                                                                                                                                                                                                                                                                                                                                                                                                                                                                                                                                                                                                                                                                                                                                                                                                                                                                                                                    | H -3.533355 1.370048 -2.493571<br>H -3.682187 -1.096611 -2.634189                                                                                                                                                                                                                                                                                                                                                                                                                                                                                                                                                                                                                                                                                                                                                                                                                                                                                                                                                                                                                                                                                                                                                               | H -2.069239 2.065276 -2.695451<br>H -1.443294 2.624970 2.320045<br>H -2.667879 1.934324 3.378681<br>H -4.092043 2.214285 -1.226488<br>H -3.955639 0.497791 -0.834007<br>H -3.830542 0.937254 1.376562<br>H -3.753928 2.698675 1.312599<br>H -0.815377 -2.158983 -3.521550<br>H -0.699036 -2.437307 1.982026<br>H 0.547634 -2.537003 -1.963281<br>H -1.040872 0.123762 -3.118509<br>H -0.622995 0.696564 3.162399<br>H -0.602714 2.731403 -1.648117<br>H 0.982706 0.218553 -3.126552<br>H 0.794895 2.172362 2.228228<br>H 0.719686 -0.968581 3.073626<br>H 1.988225 -2.526777 -0.530837<br>H -2.021542 2.569813 -0.186414                                                                                                                                                                                                                                                                                                                                                                                                                                                                                                                                                                                                           |
| 0<br>(S=0) | O 2.248350 0.972519 1.154791<br>O 1.105665 1.731180 -1.153073<br>O 2.013860 -1.690922 1.071086<br>O 2.340729 -0.650385 -1.344469<br>C 3.219051 0.252579 1.905083<br>C 1.736751 2.738773 -0.345586<br>C 2.649441 -1.114735 2.214078<br>C 1.718725 1.405167 -2.410216<br>C 2.807689 -2.433074 0.145294<br>C 2.795969 0.350489 -2.255570<br>C 3.374406 -1.542279 -0.941345<br>C 2.785323 2.157842 0.569961<br>H 3.446796 0.788300 2.843463<br>H 4.150183 0.190363 1.315391<br>H 0.933020 3.188361 0.250111<br>H 2.167367 3.526872 -0.983334<br>H 3.434957 -1.791183 2.588141<br>H 1.839956 -1.030144 2.952580<br>H 2.139945 2.314407 -2.869253<br>H 0.896511 1.026991 -3.028079<br>H 2.105359 -3.159841 -0.288428<br>H 3.612957 -2.965377 0.676432<br>H 3.009445 -0.103511 -3.239436<br>H 3.734409 0.781905 -1.867809<br>H 4.243806 -0.956703 -0.595596<br>H 3.697301 -2.156965 -1.800047<br>H 3.035480 2.895641 1.353659<br>H 3.716513 1.914083 0.030599<br>Th 0.022872 -0.354471 0.055610<br>H -3.187009 -0.175306 3.139491<br>H -3.702754 -2.243307 1.704144<br>C -2.953964 0.302446 2.170843<br>H -1.110069 0.995939 3.032342<br>C -3.385676 -1.624747 0.845371<br>O -2.429439 -0.662172 1.268261 | O 1.748600 -0.433324 1.936559<br>O -0.315140 1.460993 2.307392<br>O 0.382746 -2.584504 0.848072<br>O -2.386739 1.051547 0.444930<br>O -2.236604 -1.717048 0.178876<br>C -1.682509 1.551643 2.722281<br>C 0.770578 -2.635594 2.227031<br>C -2.548453 1.948440 1.556491<br>C 1.847153 0.642313 2.882422<br>C 0.488759 1.022807 3.406156<br>C -0.672695 -3.493924 0.526943<br>C -3.516950 0.278974 0.028258<br>C -2.026990 -2.941964 0.885531<br>C -3.452260 -1.106596 0.610065<br>C 1.990431 -1.772927 2.405681<br>H 2.263499 -1.755809 3.471485<br>H -1.777393 2.313898 3.517087<br>H -1.990890 0.571929 3.131233<br>H 1.020181 -3.675107 2.502264<br>H -0.057598 -2.281673 2.865861<br>H -3.598470 1.951515 1.886414<br>H -2.286499 2.952187 1.195964<br>H 2.309080 1.475884 2.337386<br>H 2.503535 0.350057 3.714849<br>H -0.001388 0.158986 3.891281<br>H 0.577880 1.837448 4.147043<br>H -0.513329 -4.447495 1.055448<br>H -0.601284 -3.669335 -0.551324<br>H -3.471168 0.250993 -1.068518<br>H -4.449612 0.775066 0.334385<br>H -2.808290 -3.670477 0.601951<br>H -2.109786 -2.746107 1.969416<br>H -3.466375 -1.071567 1.714757<br>H -4.313604 -1.706793 0.266714<br>H 2.834590 -2.167264 1.821816 | N -1.738004 -1.302047 -1.493486<br>N -1.570495 1.611319 -1.482230<br>N -2.283040 -1.380968 1.203307<br>N -2.026198 1.388640 1.372654<br>C -2.141125 -2.605393 -0.942624<br>C -2.422867 0.860036 -2.424990<br>C -2.882963 -2.435052 0.380189<br>C -2.272545 2.652808 -0.709180<br>C -3.237801 -0.645373 2.035946<br>C -2.976519 2.093975 0.514875<br>C -2.637312 0.674986 2.493489<br>C -2.889618 -0.474846 -1.882437<br>H -1.222900 -3.186643 -0.785557<br>H -2.780038 -3.165442 -1.650160<br>H -1.819027 0.672304 -3.329045<br>H -3.294163 1.462681 -2.735111<br>H -3.928109 -2.156882 0.185136<br>H -2.917148 -3.406336 0.902757<br>H -2.999259 3.193869 -1.339759<br>H -1.514084 3.376631 -0.375970<br>H -3.566240 -1.225553 2.917690<br>H -4.140840 -0.463745 1.432058<br>H -3.474058 2.920679 1.054258<br>H -3.771922 1.397758 0.211177<br>H -3.413007 1.282720 2.996003<br>H -1.833157 0.483999 3.219062<br>H -3.494106 -0.983262 -2.657153<br>H -3.535550 -0.338795 -1.006835<br>Th 0.001073 -0.012805 0.169806<br>H -1.200355 -1.475926 -2.359457<br>H -1.542163 -1.782101 1.799180<br>H -1.327286 2.058875 1.742366<br>H -0.875478 2.092971 -2.064945<br>H 1.168656 3.181488 -0.734051<br>H 1.512829 1.772935 1.818733 | N -0.278400 1.827019 -2.152847<br>N -1.358888 -0.934897 -2.299797<br>N -1.498866 2.410223 0.440901<br>N -1.461197 -2.488063 0.194966<br>N -2.373431 -0.114219 1.679612<br>C -2.568126 -1.672401 -1.901693<br>C -2.156884 2.805029 -0.812998<br>C -2.230580 -2.845752 -1.013998<br>C -0.586416 1.115599 -3.404398<br>C -1.727156 0.140763 -3.228155<br>C -2.470945 2.349614 1.535879<br>C -2.261802 -2.552213 1.423314<br>C -3.251793 1.056666 1.540079<br>C -3.162106 -1.348721 1.563780<br>C -1.130830 3.011142 -1.902994<br>H -1.631663 3.333299 -2.831011<br>H -3.104858 -2.056066 -2.791642<br>H -3.222790 -0.951162 -1.391195<br>H -2.707664 3.756401 -0.677038<br>H -2.880122 2.028004 -1.090816<br>H -3.154122 -3.387430 -0.748424<br>H -1.619573 -3.563894 -1.595582<br>H 0.311335 0.560077 -3.720594<br>H -0.821534 1.825792 -4.215664<br>H -2.599481 0.662059 -2.810858<br>H -2.029717 -0.265129 -4.209635<br>H -3.173959 3.200892 1.491605<br>H -1.931285 2.480061 2.488413<br>H -1.573230 -2.606600 2.284127<br>H -2.865810 -3.474853 1.456173<br>H -4.005607 1.088951 2.350378<br>H -3.797083 0.939857 0.593876<br>H -3.803247 -1.255224 0.677660<br>H -3.834003 -1.479579 2.431214<br>H -0.475152 3.841963 -1.591258 |

|            |   |           |           |           |    |           |           |           |   |           |           |           |    |           |           |           |
|------------|---|-----------|-----------|-----------|----|-----------|-----------|-----------|---|-----------|-----------|-----------|----|-----------|-----------|-----------|
|            | H | -2.002312 | -3.182460 | 0.291352  | Th | 0.008076  | -0.011154 | -0.000561 | H | 1.198011  | 1.490691  | -2.352494 | Th | 0.001186  | -0.000956 | -0.000794 |
|            | C | -1.908458 | 1.381977  | 2.385076  | O  | -0.061228 | -1.797433 | -1.940576 | C | 2.099491  | 2.623454  | -0.907624 | N  | 0.397316  | 0.864715  | 2.678853  |
|            | H | -3.890568 | 0.707141  | 1.750223  | O  | -1.326115 | 0.706416  | -2.304817 | N | 2.253985  | 1.364787  | 1.214088  | N  | 1.207944  | -1.842292 | 1.754612  |
|            | C | -2.713429 | -2.497969 | -0.195957 | O  | 2.382947  | -1.075103 | -0.849280 | N | 1.728373  | 1.321152  | -1.484153 | N  | 1.691563  | 2.288496  | 0.480592  |
|            | H | -4.274428 | -1.102769 | 0.449728  | O  | -0.359506 | 2.582231  | -0.439899 | H | 1.832386  | -0.508933 | 3.217004  | N  | 1.269021  | -2.320526 | -1.156149 |
|            | H | -2.365161 | 2.278700  | 2.833841  | O  | 2.263063  | 1.682461  | -0.182274 | H | 2.839431  | 3.405619  | 0.957201  | N  | 2.399796  | 0.365710  | -1.628871 |
|            | H | -3.455891 | -3.079261 | -0.765053 | C  | -1.041662 | 2.048489  | -2.715177 | C | 2.840527  | 2.444782  | 0.413865  | C  | 2.348771  | -2.509181 | 1.103777  |
|            | O | -1.235722 | 1.733421  | 1.170056  | C  | 2.322202  | -1.456538 | -2.229763 | H | 2.723769  | 3.213964  | -1.602713 | C  | 2.379718  | 2.083772  | 1.762505  |
|            | O | -1.900931 | -1.728121 | -1.080666 | C  | -1.183492 | 2.986241  | -1.546077 | C | 2.640755  | -0.689921 | 2.494137  | C  | 1.935918  | -3.198149 | -0.175764 |
|            | C | -1.851459 | 2.709980  | 0.320176  | C  | -1.122701 | -1.596246 | -2.886270 | C | 3.220665  | 0.642279  | 2.044143  | C  | 0.608492  | -0.293070 | 3.562368  |
|            | H | -2.336779 | 3.491372  | 0.925085  | C  | -1.117704 | -0.183711 | -3.404841 | N | 2.039691  | -1.408231 | 1.368892  | C  | 1.658213  | -1.230535 | 3.012270  |
|            | C | -2.493652 | -1.178683 | -2.256789 | C  | 3.545452  | -0.306780 | -0.528840 | H | 1.353304  | -2.084557 | 1.727913  | C  | 2.653303  | 2.592236  | -0.582316 |
|            | H | -3.238049 | -1.880362 | -2.667489 | C  | 0.693013  | 3.458282  | -0.024163 | H | 3.530563  | 1.223929  | 2.931454  | C  | 2.126950  | -1.977761 | -2.296889 |
|            | O | -2.222732 | 0.934547  | -1.203381 | C  | 3.383654  | 1.146351  | -0.889828 | H | 0.900214  | -2.054891 | -2.086935 | C  | 3.348887  | 1.349465  | -1.088329 |
|            | H | -1.032555 | 3.176679  | -0.240652 | C  | 2.006759  | 3.019264  | -0.610894 | N | 1.598183  | -1.582564 | -1.495591 | C  | 3.105408  | -0.879253 | -1.963993 |
|            | H | -3.777178 | 1.806029  | -0.152333 | C  | 1.161241  | -2.396753 | -2.408354 | H | 1.855656  | -0.636542 | -3.335919 | C  | 1.372628  | 1.960233  | 2.880863  |
|            | C | -2.832937 | 2.091293  | -0.646570 | H  | 1.070518  | -2.655804 | -3.473884 | C | 2.897265  | 0.516257  | -1.868415 | H  | 1.895572  | 1.843105  | 3.844406  |
|            | H | -4.080406 | 0.071553  | -1.444453 | H  | -1.751092 | 2.350390  | -3.507183 | C | 2.452622  | -0.819896 | -2.425498 | H  | 2.792288  | -3.269664 | 1.778185  |
|            | H | -1.656765 | -1.073201 | -2.959207 | H  | -0.015834 | 2.080605  | -3.125726 | H | 3.893781  | 2.197238  | 0.221943  | H  | 3.103252  | -1.732542 | 0.919125  |
|            | C | -3.125569 | 0.170787  | -1.989943 | H  | 3.254993  | -1.975471 | -2.510972 | H | 3.424602  | -1.288664 | 2.994893  | H  | 3.045413  | 2.939084  | 1.988833  |
|            | H | -3.072111 | 2.822218  | -1.440171 | H  | 2.200578  | -0.560636 | -2.863672 | H | 3.502782  | 1.041583  | -2.630775 | H  | 2.994649  | 1.177189  | 1.685539  |
|            | H | -3.331987 | 0.686611  | -2.944463 | H  | -0.900636 | 3.997942  | -1.874514 | H | 1.543317  | -3.365908 | -0.423032 | H  | 2.811948  | -3.697490 | -0.622740 |
|            |   |           |           |           | H  | -2.218445 | 3.007074  | -1.179809 | C | 2.300482  | -2.632245 | -0.737501 | H  | 1.230669  | -4.016462 | 0.070265  |
|            |   |           |           |           | H  | -2.050724 | -1.816822 | -2.342397 | H | 4.131215  | 0.481016  | 1.445664  | H  | -0.344527 | -0.838445 | 3.658842  |
|            |   |           |           |           | H  | -1.018415 | -2.303261 | -3.721985 | C | 2.997492  | -2.087119 | 0.497018  | H  | 0.890206  | 0.030255  | 4.579013  |
|            |   |           |           |           | H  | -0.150620 | 0.053972  | -3.884618 | H | 3.534157  | 0.383120  | -0.985962 | H  | 2.581388  | -0.673722 | 2.803504  |
|            |   |           |           |           | H  | -1.922533 | -0.046370 | -4.149023 | H | 3.778154  | -1.370564 | 0.204114  | H  | 1.905537  | -2.002086 | 3.763335  |
|            |   |           |           |           | H  | 4.419028  | -0.720842 | -1.057407 | H | 3.333504  | -1.410939 | -2.730500 | H  | 3.411506  | 3.318662  | -0.238423 |
|            |   |           |           |           | H  | 3.695902  | -0.420838 | 0.549787  | H | 3.513178  | -2.913087 | 1.020402  | H  | 2.119892  | 3.103896  | -1.400048 |
|            |   |           |           |           | H  | 0.710065  | 3.405859  | 1.072544  | H | 3.034024  | -3.159867 | -1.371903 | H  | 1.475508  | -1.661308 | -3.130894 |
|            |   |           |           |           | H  | 0.469553  | 4.491116  | -0.329082 |   |           |           |           | H  | 2.670868  | -2.865251 | -2.662409 |
|            |   |           |           |           | H  | 4.297418  | 1.700095  | -0.607186 |   |           |           |           | H  | 4.106570  | 1.632644  | -1.843057 |
|            |   |           |           |           | H  | 3.217189  | 1.278285  | -1.973815 |   |           |           |           | H  | 3.884088  | 0.859321  | -0.263519 |
|            |   |           |           |           | H  | 1.973220  | 3.044370  | -1.715553 |   |           |           |           | H  | 3.714142  | -1.162330 | -1.095488 |
|            |   |           |           |           | H  | 2.820502  | 3.683119  | -0.268658 |   |           |           |           | H  | 3.801724  | -0.730086 | -2.809954 |
|            |   |           |           |           | H  | 1.310243  | -3.315744 | -1.823602 |   |           |           |           | H  | 0.811178  | 2.909038  | 2.936059  |
|            |   |           |           |           |    |           |           |           |   |           |           |           | H  | 0.558665  | -2.599027 | 2.014150  |
|            |   |           |           |           |    |           |           |           |   |           |           |           | H  | -0.507657 | 1.259887  | 2.936619  |
|            |   |           |           |           |    |           |           |           |   |           |           |           | H  | 1.126273  | 3.154519  | 0.603854  |
|            |   |           |           |           |    |           |           |           |   |           |           |           | H  | 0.522364  | -2.911597 | -1.569184 |
|            |   |           |           |           |    |           |           |           |   |           |           |           | H  | 0.666297  | 2.194535  | -2.259719 |
|            |   |           |           |           |    |           |           |           |   |           |           |           | H  | -0.868775 | 3.206979  | 0.679123  |
|            |   |           |           |           |    |           |           |           |   |           |           |           | H  | -0.782965 | -1.605544 | -2.829606 |
|            |   |           |           |           |    |           |           |           |   |           |           |           | H  | -0.759673 | -3.239341 | 0.291229  |
|            |   |           |           |           |    |           |           |           |   |           |           |           | H  | -2.026040 | -0.096448 | 2.644767  |
|            |   |           |           |           |    |           |           |           |   |           |           |           | H  | 2.068570  | 0.742791  | -2.523050 |
| 0<br>(S=1) | O | 2.248017  | 0.951291  | 1.206819  | O  | -1.357391 | 1.387484  | 1.768744  | N | -1.741249 | -1.311581 | -1.485848 | N  | -0.452497 | 2.175318  | -1.754282 |
|            | O | 1.215112  | 1.726978  | -1.162628 | O  | -0.903990 | -1.343725 | 2.217862  | N | -1.569003 | 1.600422  | -1.492360 | N  | -1.504879 | -0.533766 | -2.276992 |
|            | O | 1.924169  | -1.718190 | 1.087017  | O  | 1.124094  | 2.305815  | 0.984381  | N | -2.288374 | -1.369772 | 1.213819  | N  | -1.564460 | 2.184164  | 0.996168  |
|            | O | 2.412241  | -0.656443 | -1.266720 | O  | 1.214263  | -2.249551 | 0.617042  | N | -2.022191 | 1.398731  | 1.366114  | N  | -1.227768 | -2.590371 | -0.184405 |
|            | C | 3.170471  | 0.181538  | 1.962837  | O  | 2.734289  | 0.042323  | 0.551985  | C | -2.150532 | -2.608314 | -0.923352 | N  | -2.348919 | -0.555229 | 1.558268  |
|            | C | 1.840650  | 2.709289  | -0.326707 | C  | 0.072389  | -2.229446 | 2.760609  | C | -2.417330 | 0.844974  | -2.434778 | C  | -2.515756 | -1.584579 | -2.070802 |
|            | C | 2.537618  | -1.163291 | 2.249170  | C  | 0.674983  | 2.582545  | 2.312588  | C | -2.895415 | -2.423071 | 0.395646  | C  | -2.081696 | 3.041524  | -0.084507 |

|  |    |           |           |           |    |           |           |           |    |           |           |           |    |           |           |           |
|--|----|-----------|-----------|-----------|----|-----------|-----------|-----------|----|-----------|-----------|-----------|----|-----------|-----------|-----------|
|  | C  | 1.867384  | 1.379013  | -2.390322 | C  | 0.669387  | -3.069165 | 1.659035  | C  | -2.273970 | 2.644512  | -0.725841 | C  | -1.929837 | -2.832498 | -1.453511 |
|  | C  | 2.721745  | -2.492023 | 0.192065  | C  | -2.235511 | 0.598058  | 2.595576  | C  | -3.235673 | -0.628237 | 2.049345  | C  | -1.186865 | 1.798602  | -2.975717 |
|  | C  | 2.914362  | 0.296410  | -2.195152 | C  | -1.474943 | -0.524348 | 3.244858  | C  | -2.975785 | 2.093432  | 0.502770  | C  | -2.174919 | 0.680132  | -2.773933 |
|  | C  | 3.373102  | -1.624140 | -0.867566 | C  | 2.543463  | 2.407243  | 0.817913  | C  | -2.630709 | 0.694463  | 2.494512  | C  | -2.648102 | 1.836956  | 1.925832  |
|  | C  | 2.847062  | 2.098400  | 0.618508  | C  | 2.624660  | -2.318590 | 0.352079  | C  | -2.889886 | -0.484396 | -1.884699 | C  | -2.042859 | -2.921256 | 0.992076  |
|  | H  | 3.412138  | 0.694363  | 2.910528  | C  | 3.260514  | 1.158777  | 1.262384  | H  | -1.234571 | -3.190753 | -0.757900 | C  | -3.325475 | 0.544341  | 1.557375  |
|  | H  | 4.106701  | 0.075029  | 1.387292  | C  | 3.335388  | -1.169003 | 1.007995  | H  | -2.789254 | -3.172693 | -1.627729 | C  | -3.033594 | -1.835870 | 1.324240  |
|  | H  | 1.030016  | 3.169823  | 0.250955  | C  | -0.832665 | 2.611303  | 2.303868  | H  | -1.808634 | 0.649636  | -3.334271 | C  | -0.999204 | 3.367159  | -1.083831 |
|  | H  | 2.305722  | 3.494339  | -0.942756 | H  | -1.210132 | 2.768464  | 3.323989  | H  | -3.285127 | 1.447591  | -2.754517 | H  | -1.379135 | 4.090899  | -1.822999 |
|  | H  | 3.285410  | -1.865322 | 2.652926  | H  | -0.402543 | -2.891596 | 3.504891  | H  | -3.937131 | -2.135908 | 0.195541  | H  | -3.003147 | -1.847477 | -3.027819 |
|  | H  | 1.711955  | -1.049065 | 2.963524  | H  | 0.853620  | -1.617728 | 3.245771  | H  | -2.940962 | -3.391205 | 0.923291  | H  | -3.292598 | -1.155508 | -1.425202 |
|  | H  | 2.317666  | 2.276831  | -2.843055 | H  | 1.055835  | 3.566961  | 2.632962  | H  | -3.001553 | 3.179641  | -1.360529 | H  | -2.478231 | 3.982693  | 0.336180  |
|  | H  | 1.058674  | 0.998929  | -3.027783 | H  | 1.042151  | 1.795784  | 2.991572  | H  | -1.517251 | 3.372767  | -0.397594 | H  | -2.922457 | 2.528175  | -0.569551 |
|  | H  | 2.002700  | -3.180556 | -0.277579 | H  | 1.456338  | -3.711085 | 2.079894  | H  | -3.557923 | -1.202491 | 2.937269  | H  | -2.723735 | -3.588157 | -1.330503 |
|  | H  | 3.475391  | -3.068763 | 0.751105  | H  | -0.099173 | -3.706796 | 1.201593  | H  | -4.143186 | -0.449606 | 1.451379  | H  | -1.209826 | -3.290477 | -2.159023 |
|  | H  | 3.116585  | -0.193158 | -3.164795 | H  | -3.028362 | 0.214552  | 1.937389  | H  | -3.475271 | 2.923226  | 1.035665  | H  | -0.427940 | 1.493098  | -3.722713 |
|  | H  | 3.864410  | 0.700925  | -1.805960 | H  | -2.717117 | 1.232930  | 3.352898  | H  | -3.769194 | 1.392015  | 0.206098  | H  | -1.695711 | 2.673708  | -3.412368 |
|  | H  | 4.275143  | -1.106855 | -0.496590 | H  | -0.659104 | -0.133772 | 3.877358  | H  | -3.403719 | 1.307310  | 2.994985  | H  | -2.946510 | 0.949678  | -2.040147 |
|  | H  | 3.663619  | -2.245977 | -1.733340 | H  | -2.161061 | -1.130174 | 3.861650  | H  | -1.824321 | 0.507681  | 3.218619  | H  | -2.691342 | 0.475142  | -3.730101 |
|  | H  | 3.113084  | 2.838010  | 1.395071  | H  | 2.922162  | 3.277319  | 1.376434  | H  | -3.493402 | -0.997263 | -2.657014 | H  | -3.388428 | 2.652111  | 1.994483  |
|  | H  | 3.775003  | 1.803713  | 0.099681  | H  | 2.713843  | 2.576278  | -0.249946 | H  | -3.537966 | -0.339797 | -1.012113 | H  | -2.216882 | 1.747774  | 2.939879  |
|  | Th | -0.022607 | -0.358518 | -0.034028 | H  | 2.739940  | -2.274487 | -0.739559 | Th | 0.001016  | -0.011420 | 0.166533  | H  | -1.352670 | -3.086898 | 1.838413  |
|  | H  | -3.084085 | -0.047426 | 3.215183  | H  | 3.033926  | -3.277495 | 0.701184  | H  | -1.203620 | -1.496996 | -2.349357 | H  | -2.566327 | -3.881311 | 0.849977  |
|  | H  | -3.742441 | -2.130414 | 1.795026  | H  | 4.338143  | 1.261017  | 1.043106  | H  | -1.545517 | -1.771497 | 1.806186  | H  | -4.141570 | 0.347876  | 2.278707  |
|  | C  | -2.837378 | 0.383922  | 2.229093  | H  | 3.130202  | 0.980096  | 2.343962  | H  | -1.326506 | 2.075438  | 1.729459  | H  | -3.779537 | 0.593600  | 0.556642  |
|  | H  | -0.945578 | 1.047949  | 3.025249  | H  | 3.242042  | -1.217964 | 2.107768  | H  | -0.872416 | 2.081272  | -2.074763 | H  | -3.745642 | -1.695724 | 0.500808  |
|  | C  | -3.394235 | -1.529241 | 0.936678  | H  | 4.404133  | -1.181191 | 0.729297  | H  | 1.179631  | 3.177792  | -0.737765 | H  | -3.631124 | -2.130387 | 2.204877  |
|  | O  | -2.364419 | -0.638831 | 1.353455  | H  | -1.198689 | 3.430053  | 1.666861  | H  | 1.515020  | 1.782782  | 1.817425  | H  | -0.173446 | 3.875020  | -0.559802 |
|  | H  | -2.110317 | -3.154286 | 0.334244  | Th | -0.003095 | 0.013585  | -0.002873 | H  | 1.200881  | 1.487069  | -2.352639 | Th | 0.000133  | 0.015913  | -0.010147 |
|  | C  | -1.754940 | 1.431191  | 2.393365  | O  | 1.352069  | 1.363878  | -1.789095 | C  | 2.108333  | 2.616041  | -0.910593 | N  | 0.423158  | 0.281021  | 2.772859  |
|  | H  | -3.760113 | 0.816120  | 1.805628  | O  | 0.898584  | -1.367056 | -2.185787 | N  | 2.254140  | 1.366440  | 1.216578  | N  | 1.452323  | -1.979604 | 1.253330  |
|  | C  | -2.807503 | -2.437370 | -0.123842 | O  | -1.131439 | 2.280413  | -1.019755 | N  | 1.732761  | 1.314418  | -1.485394 | N  | 1.619639  | 2.113250  | 0.888312  |
|  | H  | -4.250834 | -0.942892 | 0.561296  | O  | -1.201087 | -2.272956 | -0.575717 | H  | 1.821994  | -0.505451 | 3.221259  | N  | 1.340137  | -1.937619 | -1.627680 |
|  | H  | -2.177246 | 2.346013  | 2.839198  | O  | -2.719677 | 0.017921  | -0.554207 | H  | 2.854438  | 3.401836  | 0.949376  | N  | 2.263660  | 0.766615  | -1.575950 |
|  | H  | -3.602587 | -2.981068 | -0.658541 | C  | -0.055875 | -2.281674 | -2.720488 | C  | 2.848588  | 2.438280  | 0.410775  | C  | 2.656526  | -2.308185 | 0.471112  |
|  | O  | -1.119481 | 1.744898  | 1.145321  | C  | -0.686108 | 2.541283  | -2.352818 | H  | 2.733774  | 3.203036  | -1.607935 | C  | 2.378948  | 1.660049  | 2.066552  |
|  | O  | -2.000884 | -1.709347 | -1.049516 | C  | -0.651109 | -3.105366 | -1.606517 | C  | 2.633289  | -0.687304 | 2.501929  | C  | 2.259051  | -2.832429 | -0.889232 |
|  | C  | -1.738498 | 2.742447  | 0.314565  | C  | 2.231814  | 0.562984  | -2.605004 | C  | 3.215808  | 0.644075  | 2.053057  | C  | 0.677809  | -1.038789 | 3.374130  |
|  | H  | -2.184432 | 3.536242  | 0.934631  | C  | 1.478723  | -0.576687 | -3.230515 | N  | 2.036495  | -1.406197 | 1.374744  | C  | 1.805300  | -1.746227 | 2.662980  |
|  | C  | -2.621015 | -1.148501 | -2.209227 | C  | -2.552158 | 2.380966  | -0.853109 | H  | 1.351457  | -2.084453 | 1.731597  | C  | 2.519469  | 2.707496  | -0.115186 |
|  | H  | -3.408938 | -1.825151 | -2.578055 | C  | -2.613261 | -2.339560 | -0.318924 | H  | 3.521740  | 1.226787  | 2.940951  | C  | 1.994756  | -1.317595 | -2.790887 |
|  | O  | -2.225198 | 0.947097  | -1.160596 | C  | -3.263887 | 1.122643  | -1.273347 | H  | 0.901148  | -2.066228 | -2.078216 | C  | 3.237112  | 1.644374  | -0.910278 |
|  | H  | -0.925121 | 3.188669  | -0.270063 | C  | -3.322783 | -1.199394 | -0.991902 | N  | 1.599617  | -1.588093 | -1.492140 | C  | 2.975186  | -0.268045 | -2.338619 |
|  | H  | -3.715241 | 1.923890  | -0.098205 | C  | 0.820998  | 2.575894  | -2.346151 | H  | 1.848865  | -0.645535 | -3.335251 | C  | 1.426720  | 1.286745  | 3.175486  |
|  | C  | -2.767257 | 2.149497  | -0.615868 | H  | 1.196410  | 2.715779  | -3.369608 | C  | 2.899053  | 0.508280  | -1.875175 | H  | 1.987096  | 0.951102  | 4.062848  |
|  | H  | -4.130277 | 0.184545  | -1.366054 | H  | 0.441917  | -2.953794 | -3.441019 | C  | 2.450221  | -0.828313 | -2.427613 | H  | 3.246492  | -3.092987 | 0.981483  |
|  | H  | -1.805013 | -1.084603 | -2.942125 | H  | -0.839071 | -1.696639 | -3.234356 | H  | 3.899948  | 2.181968  | 0.220051  | H  | 3.282096  | -1.405723 | 0.407825  |
|  | C  | -3.182636 | 0.229000  | -1.930473 | H  | -1.071548 | 3.519811  | -2.685709 | H  | 3.415102  | -1.285930 | 3.006086  | H  | 3.042033  | 2.468379  | 2.429285  |
|  | H  | -2.989525 | 2.872405  | -1.421918 | H  | -1.053100 | 1.745969  | -3.021844 | H  | 3.499807  | 1.032647  | -2.642107 | H  | 3.018759  | 0.818049  | 1.772163  |
|  | H  | -3.377846 | 0.757857  | -2.880133 | H  | -1.435092 | -3.757116 | -2.018083 | H  | 1.549432  | -3.367837 | -0.414389 | H  | 3.157816  | -3.050681 | -1.487537 |
|  |    |           |           |           | H  | 0.119999  | -3.733119 | -1.139682 | C  | 2.304877  | -2.632564 | -0.729544 | H  | 1.739162  | -3.795975 | -0.734484 |
|  |    |           |           |           | H  | 3.028194  | 0.196028  | -1.942271 | H  | 4.129168  | 0.481406  | 1.459397  | H  | -0.240322 | -1.644054 | 3.300772  |
|  |    |           |           |           | H  | 2.705517  | 1.185434  | -3.377677 | C  | 2.998151  | -2.081968 | 0.504731  | H  | 0.903554  | -0.944793 | 4.448695  |

|            |                                                                                                                                                                                                                                                                                                                                                                                                                                                                                                                                                                                                                                                                                                                                                                                                                                                                                                                                                                                                                                                                                                   |                                                                                                                                                                                                                                                                                                                                                                                                                                                                                                                                                                                                                                                                                                                                                                                                                                                                                                                                                                                                                                                                                            |                                                                                                                                                                                                                                                                                                                                                                                                                                                                                                                                                                                                                                                                                                                                                                                                                                                                                                                                                                                                                                                                                                                               |                                                                                                                                                                                                                                                                                                                                                                                                                                                                                                                                                                                                                                                                                                                                                                                                                                                                                                                                                                                                                                                                                                                             |
|------------|---------------------------------------------------------------------------------------------------------------------------------------------------------------------------------------------------------------------------------------------------------------------------------------------------------------------------------------------------------------------------------------------------------------------------------------------------------------------------------------------------------------------------------------------------------------------------------------------------------------------------------------------------------------------------------------------------------------------------------------------------------------------------------------------------------------------------------------------------------------------------------------------------------------------------------------------------------------------------------------------------------------------------------------------------------------------------------------------------|--------------------------------------------------------------------------------------------------------------------------------------------------------------------------------------------------------------------------------------------------------------------------------------------------------------------------------------------------------------------------------------------------------------------------------------------------------------------------------------------------------------------------------------------------------------------------------------------------------------------------------------------------------------------------------------------------------------------------------------------------------------------------------------------------------------------------------------------------------------------------------------------------------------------------------------------------------------------------------------------------------------------------------------------------------------------------------------------|-------------------------------------------------------------------------------------------------------------------------------------------------------------------------------------------------------------------------------------------------------------------------------------------------------------------------------------------------------------------------------------------------------------------------------------------------------------------------------------------------------------------------------------------------------------------------------------------------------------------------------------------------------------------------------------------------------------------------------------------------------------------------------------------------------------------------------------------------------------------------------------------------------------------------------------------------------------------------------------------------------------------------------------------------------------------------------------------------------------------------------|-----------------------------------------------------------------------------------------------------------------------------------------------------------------------------------------------------------------------------------------------------------------------------------------------------------------------------------------------------------------------------------------------------------------------------------------------------------------------------------------------------------------------------------------------------------------------------------------------------------------------------------------------------------------------------------------------------------------------------------------------------------------------------------------------------------------------------------------------------------------------------------------------------------------------------------------------------------------------------------------------------------------------------------------------------------------------------------------------------------------------------|
|            |                                                                                                                                                                                                                                                                                                                                                                                                                                                                                                                                                                                                                                                                                                                                                                                                                                                                                                                                                                                                                                                                                                   | H 0.669891 -0.207069 -3.884020<br>H 2.173808 -1.199620 -3.821488<br>H -2.934508 3.238492 -1.428505<br>H -2.723873 2.572569 0.210730<br>H -2.732779 -2.280585 0.771002<br>H -3.019671 -3.302757 -0.660064<br>H -4.339910 1.218842 -1.039719<br>H -3.146449 0.929272 -2.353690<br>H -3.230640 -1.264801 -2.091020<br>H -4.391798 -1.204752 -0.712368<br>H 1.183307 3.407137 -1.723511                                                                                                                                                                                                                                                                                                                                                                                                                                                                                                                                                                                                                                                                                                        | H 3.541707 0.376423 -0.996798<br>H 3.775320 -1.361880 0.211400<br>H 3.328591 -1.420683 -2.736853<br>H 3.517571 -2.904702 1.029597<br>H 3.041033 -3.159560 -1.361465                                                                                                                                                                                                                                                                                                                                                                                                                                                                                                                                                                                                                                                                                                                                                                                                                                                                                                                                                           | H 2.719870 -1.139274 2.700690<br>H 2.033134 -2.701258 3.166323<br>H 3.251543 3.380020 0.363006<br>H 1.929260 3.325205 -0.807265<br>H 1.230640 -0.841353 -3.427684<br>H 2.501286 -2.074607 -3.412699<br>H 3.884917 2.137278 -1.658364<br>H 3.885202 1.030724 -0.268170<br>H 3.755875 -0.711343 -1.705489<br>H 3.476319 0.179844 -3.215613<br>H 0.876069 2.198061 3.478269<br>H 0.892042 -2.856477 1.246076<br>H -0.460227 0.617672 3.194921<br>H 1.021567 2.879870 1.237805<br>H 0.611741 -2.554432 -2.004767<br>H 0.469135 2.490781 -2.140050<br>H -0.931900 2.797853 1.555694<br>H -0.884847 -0.853008 -3.031440<br>H -0.469528 -3.313723 -0.155992<br>H -1.988996 -0.597773 2.519880<br>H 1.856303 1.378772 -2.329747                                                                                                                                                                                                                                                                                                                                                                                                     |
| 0<br>(S=2) | O 2.657466 -0.982888 -0.840740<br>O 1.224117 -1.663262 1.299744<br>O 1.935659 1.488582 -1.390702<br>O 1.921192 0.980010 1.257963<br>C 3.622235 -0.252517 -1.574498<br>C 2.084103 -2.654222 0.738104<br>C 2.894183 0.888541 -2.258373<br>C 1.624469 -1.048463 2.527324<br>C 2.344011 2.530153 -0.507370<br>C 2.474503 0.185675 2.313912<br>C 2.832218 1.985681 0.819507<br>C 3.207237 -2.041866 -0.075478<br>H 4.099045 -0.897531 -2.333754<br>H 4.409867 0.106032 -0.887593<br>H 1.432930 -3.240583 0.076562<br>H 2.488640 -3.300607 1.533517<br>H 3.603398 1.645885 -2.627877<br>H 2.297138 0.505939 -3.097336<br>H 2.169238 -1.765244 3.163830<br>H 0.693494 -0.799171 3.052666<br>H 1.439734 3.140572 -0.368450<br>H 3.124032 3.149288 -0.978894<br>H 2.506116 0.769247 3.252714<br>H 3.508859 -0.081800 2.044102<br>H 3.835556 1.537207 0.725733<br>H 2.890087 2.796367 1.565877<br>H 3.638354 -2.811642 -0.740803<br>H 4.017354 -1.646625 0.562415<br>Th -0.000104 -0.002185 -0.433167<br>H -4.100252 0.895444 -2.333051<br>H -3.636163 2.812329 -0.745529<br>C -3.623632 0.251480 -1.572772 | O -0.700725 -1.755021 1.816631<br>O 1.592908 -0.229121 2.220593<br>O -2.567490 0.080811 0.981552<br>O 1.536658 2.047028 0.619893<br>O -1.166865 2.466438 0.514907<br>C 2.050482 1.013248 2.752475<br>C -2.668357 -0.437431 2.310615<br>C 2.538557 1.898191 1.632333<br>C 0.378277 -2.237132 2.643895<br>C 1.111556 -1.082482 3.266789<br>C -3.250154 1.325421 0.784587<br>C 1.027416 3.358133 0.325874<br>C -2.414584 2.505422 1.206234<br>C -0.326857 3.537103 0.951538<br>C -2.039246 -1.808849 2.330175<br>H -2.032509 -2.200252 3.357058<br>H 2.879898 0.828559 3.457120<br>H 1.206755 1.489242 3.283110<br>H -3.731557 -0.521810 2.593422<br>H -2.144566 0.238807 3.006176<br>H 2.807630 2.882581 2.041089<br>H 3.425848 1.460769 1.154106<br>H 1.040892 -2.825505 1.992083<br>H -0.007301 -2.916002 3.417883<br>H 0.442702 -0.493822 3.917895<br>H 1.965539 -1.461971 3.855826<br>H -4.200510 1.321335 1.340703<br>H -3.474697 1.386453 -0.285367<br>H 0.963589 3.433634 -0.768804<br>H 1.723460 4.130567 0.683751<br>H -2.947219 3.438208 0.948438<br>H -2.212262 2.491588 2.291064 | N -1.702846 -1.288070 -1.520622<br>N -1.553582 1.635070 -1.457565<br>N -2.240204 -1.375222 1.190968<br>N -1.994459 1.380295 1.404233<br>C -2.136319 -2.580907 -0.962989<br>C -2.345470 0.888582 -2.454900<br>C -2.884123 -2.390909 0.350735<br>C -2.317561 2.627205 -0.676933<br>C -3.159568 -0.673134 2.091211<br>C -2.987706 2.025715 0.545846<br>C -2.558578 0.650873 2.543092<br>C -2.835320 -0.454071 -1.954805<br>H -1.231938 -3.179593 -0.788129<br>H -2.775972 -3.134348 -1.674950<br>H -1.689155 0.716030 -3.325910<br>H -3.200492 1.489307 -2.810439<br>H -3.914901 -2.065503 0.153811<br>H -2.956553 -3.365929 0.863775<br>H -3.074213 3.126941 -1.306642<br>H -1.601524 3.392302 -0.340824<br>H -3.427614 -1.276440 2.976263<br>H -4.097110 -0.495768 1.543135<br>H -3.534471 2.820611 1.085255<br>H -3.736974 1.280214 0.244289<br>H -3.324983 1.243360 3.076226<br>H -1.727819 0.466275 3.238580<br>H -3.396029 -0.954835 -2.766374<br>H -3.527785 -0.333581 -1.113483<br>Th -0.000198 -0.000358 0.168691<br>H -1.152798 -1.483281 -2.374314<br>H -1.495852 -1.839384 1.748312<br>H -1.328244 2.089176 1.752306 | N -0.627803 2.220386 -1.662523<br>N -1.624925 -0.502399 -2.214679<br>N -1.636492 2.097009 1.121705<br>N -1.152614 -2.630877 -0.233526<br>N -2.310690 -0.682476 1.580823<br>C -2.566214 -1.616523 -2.024494<br>C -2.202201 2.990904 0.097476<br>C -1.884046 -2.854405 -1.490119<br>C -1.433759 1.862928 -2.844688<br>C -2.367204 0.700764 -2.624378<br>C -2.684499 1.675573 2.060779<br>C -1.923090 -3.023231 0.954174<br>C -3.326322 0.377558 1.649401<br>C -2.945689 -1.987917 1.347966<br>C -1.159329 3.376921 -0.922308<br>H -1.573681 4.127419 -1.614638<br>H -3.078009 -1.863154 -2.972512<br>H -3.339978 -1.263403 -1.330355<br>H -2.603682 3.904464 0.569778<br>H -3.048941 2.482866 -0.384347<br>H -2.624572 -3.664107 -1.379357<br>H -1.161388 -3.230968 -2.239523<br>H -0.716728 1.610959 -3.650708<br>H -2.001358 2.734812 -3.209455<br>H -3.105718 0.913737 -1.838058<br>H -2.933263 0.511779 -3.555188<br>H -3.448762 2.461676 2.182582<br>H -2.221701 1.556998 3.058778<br>H -1.202270 -3.183806 1.775411<br>H -2.413384 -3.999162 0.799274<br>H -4.120761 0.120535 2.374720<br>H -3.802610 0.454242 0.659592 |

|  |                                 |                                 |                                |                                 |
|--|---------------------------------|---------------------------------|--------------------------------|---------------------------------|
|  | H -2.300686 -0.511361 -3.095044 | H -0.262698 3.504924 2.053793   | H -0.859600 2.166708 -1.999693 | H -3.697548 -1.863045 0.558033  |
|  | C -3.205184 2.043925 -0.078531  | H -0.762184 4.501363 0.633350   | H 1.223749 3.178183 -0.794896  | H -3.493629 -2.327314 2.244544  |
|  | O -2.657422 0.982205 -0.841343  | H -2.608544 -2.504134 1.695388  | H 1.496051 1.840793 1.751831   | H -0.320656 3.870396 -0.405680  |
|  | H -1.429235 3.240824 0.068088   | Th -0.018017 0.001518 0.013414  | H 1.156806 1.475819 -2.378184  | Th -0.002805 0.009245 -0.016655 |
|  | C -2.897419 -0.891777 -2.254890 | O -1.794126 0.601811 -1.815276  | C 2.130657 2.582353 -0.966569  | N 0.543879 0.224570 2.770852    |
|  | H -4.411208 -0.104657 -0.884533 | O 0.856883 1.341737 -2.233364   | N 2.237998 1.379207 1.189407   | N 1.606481 -1.935831 1.153117   |
|  | C -2.080395 2.657196 0.732046   | O -1.589331 -2.012722 -0.990206 | N 1.703231 1.286293 -1.521220  | N 1.606342 2.131916 0.886617    |
|  | H -4.015067 1.651487 0.561404   | O 2.560582 -0.147563 -0.612880  | H 1.735446 -0.460481 3.237799  | N 1.392004 -1.851728 -1.712281  |
|  | H -3.607690 -1.649197 -2.622210 | O 1.132795 -2.477021 -0.543149  | H 2.939904 3.374675 0.861899   | N 2.216830 0.881835 -1.613877   |
|  | H -2.483197 3.306501 1.525956   | C 2.098835 0.883512 -2.760887   | C 2.876502 2.398837 0.349369   | C 2.799535 -2.192384 0.329255   |
|  | O -1.938710 -1.491127 -1.386886 | C -2.042816 -1.750878 -2.319491 | H 2.769793 3.136148 -1.678755  | C 2.438841 1.641458 1.998471    |
|  | O -1.221132 1.666774 1.295564   | C 3.087638 0.704810 -1.636246   | C 2.563751 -0.646901 2.539843  | C 2.377423 -2.715254 -1.023962  |
|  | C -2.347505 -2.529978 -0.500538 | C -1.455789 1.726082 -2.653449  | C 3.163052 0.676105 2.083185   | C 0.842826 -1.105796 3.324805   |
|  | H -3.128853 -3.149242 -0.969708 | C -0.104987 1.522575 -3.278830  | N 1.995796 -1.378927 1.404638  | C 1.973458 -1.759786 2.567368   |
|  | C -1.621407 1.055584 2.524936   | C -1.079761 -3.337568 -0.796206 | H 1.326982 -2.083553 1.756303  | C 2.432062 2.804869 -0.130353   |
|  | H -2.165260 1.774454 3.159884   | C 3.229075 -1.388115 -0.334481  | H 3.438350 1.279318 2.966083   | C 1.979676 -1.177729 -2.881148  |
|  | O -1.920999 -0.976141 1.260959  | C 0.358566 -3.461664 -1.224279  | H 0.861799 -2.163927 -2.003578 | C 3.171514 1.804384 -0.985758   |
|  | H -1.443807 -3.141207 -0.361152 | C 2.492286 -2.529640 -0.975389  | N 1.554938 -1.635895 -1.456212 | C 2.933865 -0.097955 -2.440356  |
|  | H -3.836525 -1.532040 0.731573  | C -2.692378 -0.389737 -2.332826 | H 1.705437 -0.719832 -3.324726 | C 1.556691 1.229797 3.150358    |
|  | C -2.833730 -1.981661 0.825487  | H -2.991675 -0.128417 -3.357426 | C 2.839827 0.452959 -1.945739  | H 2.168353 0.875213 3.994979    |
|  | H -3.506990 0.089404 2.045446   | H 2.492921 1.626253 -3.476346   | C 2.354679 -0.890579 -2.448020 | H 3.445362 -2.952591 0.806379   |
|  | H -0.690432 0.806915 3.050566   | H 1.921778 -0.074149 -3.282228  | H 3.910263 2.081401 0.155240   | H 3.379494 -1.259548 0.259134   |
|  | C -2.472724 -0.178349 2.315262  | H -2.786560 -2.511335 -2.612489 | H 3.331911 -1.238145 3.071814  | H 3.127606 2.435318 2.342428    |
|  | H -2.892040 -2.790542 1.573769  | H -1.187353 -1.780687 -3.014047 | H 3.406732 0.953410 -2.753182  | H 3.057549 0.808344 1.637169    |
|  | H -2.504239 -0.759458 3.255579  | H 4.019097 0.279084 -2.035795   | H 1.590544 -3.391847 -0.337215 | H 3.261296 -2.883606 -1.659042  |
|  |                                 | H 3.315292 1.673739 -1.170577   | C 2.311818 -2.631970 -0.673949 | H 1.905766 -3.702907 -0.865774  |
|  |                                 | H -1.464241 2.616921 -2.008802  | H 4.096317 0.497274 1.528258   | H -0.060555 -1.732147 3.247858  |
|  |                                 | H -2.224405 1.871789 -3.426173  | C 2.985294 -2.032600 0.548032  | H 1.089222 -1.041251 4.397268   |
|  |                                 | H -0.097288 0.626797 -3.923908  | H 3.525317 0.333944 -1.098528  | H 2.877182 -1.137486 2.620366   |
|  |                                 | H 0.162020 2.411393 -3.878577   | H 3.739709 -1.292758 0.245318  | H 2.226985 -2.731482 3.024413   |
|  |                                 | H -1.699736 -4.061193 -1.348309 | H 3.212792 -1.491487 -2.795622 | H 3.146430 3.500672 0.341469    |
|  |                                 | H -1.172256 -3.548948 0.274184  | H 3.526599 -2.829917 1.089361  | H 1.781447 3.409118 -0.778923   |
|  |                                 | H 3.239933 -1.500094 0.758466   | H 3.065594 -3.137616 -1.302408 | H 1.173989 -0.717356 -3.476446  |
|  |                                 | H 4.269901 -1.351870 -0.687509  |                                | H 2.495310 -1.898589 -3.538335  |
|  |                                 | H 0.729555 -4.468873 -0.961308  |                                | H 3.747869 2.349639 -1.754884   |
|  |                                 | H 0.474823 -3.309778 -2.311519  |                                | H 3.890169 1.220415 -0.392236   |
|  |                                 | H 2.516091 -2.452882 -2.077322  |                                | H 3.763670 -0.522133 -1.857993  |
|  |                                 | H 2.943689 -3.489130 -0.664280  |                                | H 3.372140 0.395552 -3.326464   |
|  |                                 | H -3.589219 -0.386837 -1.695552 |                                | H 1.012867 2.125075 3.508649    |
|  |                                 |                                 |                                | H 1.061702 -2.818610 1.111579   |
|  |                                 |                                 |                                | H -0.325842 0.544742 3.233246   |
|  |                                 |                                 |                                | H 0.996521 2.852413 1.303347    |
|  |                                 |                                 |                                | H 0.680299 -2.495369 -2.076519  |
|  |                                 |                                 |                                | H 0.264266 2.557977 -2.092683   |
|  |                                 |                                 |                                | H -0.997002 2.689789 1.692710   |
|  |                                 |                                 |                                | H -1.007992 -0.746958 -2.996492 |
|  |                                 |                                 |                                | H -0.370597 -3.329489 -0.250465 |
|  |                                 |                                 |                                | H -1.893003 -0.727329 2.516293  |
|  |                                 |                                 |                                | H 1.718303 1.473719 -2.323473   |
